# Supplementary material for: tRNA-like Transcripts from the NEAT1-MALAT1 Genomic Region Critically Influence Human Innate Immunity and Macrophage Functions
Source: MDPI journal article supplement (doi:10.3390/cells11243970), 2022-12-08
Supplement: s1 [file s1]

## SUPPLEMENTAL MATERIAL

# tRNA-like Transcripts from the *NEAT1-MALAT1* Genomic Region Critically Influence Human Innate Immunity and Macrophage Functions

Martina Gast <sup>1,2,†</sup>, Vanasa Nageswaran <sup>1,3,†</sup>, Andreas W. Kuss <sup>4,†</sup>, Ana Tzvetkova <sup>4,5</sup>, Xiaomin Wang <sup>1</sup>, Liliana H. Mochmann <sup>1</sup>, Pegah Ramezani Rad <sup>1</sup>, Stefan Weiss <sup>4,6</sup>, Stefan Simm <sup>5</sup>, Tanja Zeller <sup>7,8</sup>, Henry Voelzke <sup>6,9</sup>, Wolfgang Hoffmann <sup>6,9</sup>, Uwe Völker <sup>4,6</sup>, Stefan B. Felix <sup>6,10</sup>, Marcus Dörr <sup>6,10</sup>, Antje Beling <sup>2,11,12</sup>, Carsten Skurk <sup>1,2</sup>, David-Manuel Leistner <sup>1,2,12</sup>, Bernhard H. Rauch <sup>6,13,14</sup>, Tetsuro Hirose <sup>15</sup>, Bettina Heidecker <sup>1</sup>, Karin Klingel <sup>16</sup>, Shinichi Nakagawa <sup>17,18</sup>, Wolfram C. Poller <sup>19,20</sup>, Filip K. Swirski <sup>19,20</sup>, Arash Haghikia <sup>1,2,12,‡</sup> and Wolfgang Poller <sup>1,2,21,\*;‡</sup>

<sup>1</sup> Department of Cardiology, Campus Benjamin Franklin, Charité—Universitätsmedizin Berlin, Corporate Member of Freie Universität Berlin, Humboldt-Universität zu Berlin, Berlin Institute of Health, 12200 Berlin, Germany

<sup>2</sup> German Center for Cardiovascular Research (DZHK), Site Berlin, 12200 Berlin, Germany

<sup>3</sup> Institute for Chemistry and Biochemistry, Freie Universität Berlin, 12200 Berlin, Germany

<sup>4</sup> Department of Functional Genomics, Interfaculty Institute of Genetics and Functional Genomics, University Medicine Greifswald, 17475 Greifswald, Germany

<sup>5</sup> Institute of Bioinformatics, University Medicine Greifswald, 17475 Greifswald, Germany

<sup>6</sup> German Center for Cardiovascular Research (DZHK), Site Greifswald, 17487 Greifswald, Germany

<sup>7</sup> University Center of Cardiovascular Science, University Heart and Vascular Center, 20246 Hamburg, Germany

<sup>8</sup> German Center for Cardiovascular Research (DZHK), Site Hamburg/Lübeck/Kiel, 20246 Hamburg, Germany

<sup>9</sup> Institute for Community Medicine, University Medicine Greifswald, 17475 Greifswald, Germany

<sup>10</sup> Department of Cardiology, University Medicine Greifswald, 17475 Greifswald, Germany

<sup>11</sup> Institute for Biochemistry, Charité—Universitätsmedizin Berlin, Corporate Member of Freie Universität Berlin, Humboldt-Universität zu Berlin, Berlin Institute of Health, 10178 Berlin, Germany

<sup>12</sup> Berlin Institute of Health (BIH), 10178 Berlin, Germany

<sup>13</sup> Institute for Pharmacology, University Medicine Greifswald, 17487 Greifswald, Germany

<sup>14</sup> Department Human Medicine, Section Pharmacology and Toxicology, Carl von Ossietzky Universität, 26129 Oldenburg, Germany

<sup>15</sup> Graduate School of Frontier Biosciences, Osaka University, 1-3 Yamadaoka, Suita 565-0871, Japan

<sup>16</sup> Institute for Pathology and Neuropathology, Department of Pathology, University Hospital Tübingen, 72076 Tübingen, Germany

<sup>17</sup> RNA Biology Laboratory, RIKEN Advanced Research Institute, Wako, Saitama 351-0198, Japan

<sup>18</sup> Faculty of Pharmaceutical Sciences, Hokkaido University, Sapporo 060-0812, Japan

<sup>19</sup> Center for Systems Biology, Massachusetts General Hospital, Harvard Medical School, Boston, MA 02114, USA

<sup>20</sup> Cardiovascular Research Institute, Icahn School of Medicine at Mount Sinai, New York, NY 10029, USA

<sup>21</sup> Berlin-Brandenburg Center for Regenerative Therapies (BCRT), Charité—Universitätsmedizin Berlin, Corporate Member of Freie Universität Berlin, Humboldt-Universität zu Berlin, Berlin Institute of Health, 13353 Berlin, Germany

\* Correspondence: pollerwolfgang1@gmail.com

† These authors contributed equally to this work as first authors.

‡ These authors contributed equally to this work as last authors.

For high resolution versions of the supplemental figures please refer to the Supplementary Information source file.

## Details of patient cohorts and experimental methods

For human studies approval was granted by the institutional ethics review board and the regulatory authorities. Investigation of human tissues was conform to the principles in the Declaration of Helsinki. Informed consent was given prior to inclusion of people in the study.

### SHIP population study and cohorts

SHIP samples were genotyped using the *Affymetrix Genome-Wide Human SNP Array 6.0*. Genotyping of samples within SHIP-TREND was obtained in two batches using *Illumina Infinium HumanOmni2.5 BeadChip* and the *Illumina Infinium Global Screening Array*, respectively. Genotypes were determined using *Birdseed 2* for SHIP and the *GenomeStudio 2.0 Genotyping Module (GenCall algorithm)* for SHIP-TREND. Standard genotype quality control was performed excluding arrays < 92% sample call rate for SHIP and <94% sample call rate for SHIP-TREND and duplicates (based on estimated IBD), mismatches between reported and genotyped sex, genetic PCA outliers, and arrays with extreme heterozygosity. Variants with call rate < 0.95 and a Hardy-Weinberg equilibrium p-value < 0.0001 were removed before imputation. Pre-phasing and Imputation of genotypes was performed with the Eagle and Minimac3 software to HRC reference v1.1 panel on Michigan Imputation Server v1.0.1 (<https://imputationserver.sph.umich.edu/>).

### CRISPR-Cas9 experiments

THP-1 cells were grown in RPMI medium containing FCS (10% [v/v]) and penicillin/streptomycin (50 I.U./50 µg/ml). Parts of the *menRNA* and *mascrRNA* regions were deleted from THP-1 cells using an adaptation of the CRISPR/Cas9 protocol described in Gundry *et al.* 2016. Protospacer sequences for each target gene were identified using the CRISPRscan scoring algorithm [[www.crisprscan.org](http://www.crisprscan.org) (Moreno-Mateos *et al.*)]. Extensive target searches employing <http://www.crisprscan.com/>, <http://crispor.tefor.net/>, and <https://cctop.cos.uni-heidelberg.de> identified no off-targets of potential relevance. DNA templates for single guide RNAs (sgRNAs) were generated by PCR (KAPA HiFi HotStart ReadyMix PCR Kit) using the pX458 plasmid containing the sgRNA scaffold sequence and using the following primers:

|                   |                                                          |
|-------------------|----------------------------------------------------------|
| G1_human_mascrNA  | taatacgactcactataGGTTGGCACTCTGGTTCCgtttagagctagaaatagc   |
| G5_human_mascrNA  | taatacgactcactataGGACGGGGTTCAAATCCCTGgtttagagctagaaatagc |
| G9_human_menRNA   | taatacgactcactataGGGGCACGTCCAGCACGGCTgtttagagctagaaatagc |
| G10_human_menRNA  | taatacgactcactataGGTCCAGCACGGCTGGGCCGgtttagagctagaaatagc |
| universal reverse | AGCACCGACTCGGTGCCACT                                     |

PCR products were used to generate sgRNAs by *in vitro* transcription using HiScribe T7 High Yield RNA Synthesis Kit. 0.5µg of purified sgRNA was incubated with Cas9 protein (1 µg; PNA Bio) for 15-20 min at room temperature. 2x10<sup>5</sup> THP-1 cells were electroporated with the sgRNA/Cas9 complex using the Neon Transfection System at 1400 V, 20 ms, and one pulse. For the small RNA-deficient cell lines, two sgRNAs were selected at either end of the target sequence to delete the region in between. Deletion of *mascrNA* and *menRNA* was confirmed by PCR with the following primer pairs:

|                    |                        |
|--------------------|------------------------|
| CRISPR_hu-masc_fw  | CGTATTGTTTCTCAGGTTTTGC |
| CRISPR_hu-masc_rev | ACCTCCCAAACTCCAAGA     |
| CRISPR_hu-men_fw   | TCTGTGAAAGAGTGAGCAGGA  |
| CRISPR_hu-masc_rev | CCCAATGCTACCCCTCTAGG   |

Single-cell clones were generated by single-cell plating of the parental cell line. Gene deletions in the single-cell clones were confirmed by sequencing and proved to be stable over >25 passages so far.

### **Cell culture studies**

#### **Human monocyte cultures**

Human THP-1 cells were cultured in RPMI 1640 medium with 10% fetal bovine serum, 2 mM L-glutamine, 100 U/mL penicillin and 100 µg/mL streptomycin. For gene expression analysis of wildtype (WT) and CRISPR-Cas9 targeted THP-1 cells under immune challenge, cells were stimulated with 100 ng/ml LPS, 10 ng/ml LPS 1 µg/ml, 1 ng/ml LPS, or 1 µg/ml Concanavalin A (Con A). After 24 h, RNA was isolated by TRIzol/Chloroform.

#### **THP-1 monocyte adhesion to flow-primed human aortic endothelial cells**

For analysis of WT and CRISPR-Cas9 targeted THP-1 monocytes adhesion to flow-primed endothelial cells, primary human aortic endothelial cells (HAECs) were cultured in Endothelial Growth Medium-2 with 10% fetal bovine serum, 100 U/mL penicillin and 100 µg/mL streptomycin and seeded to confluence in µ-Slide γ-shaped ibiTreat chambers. Endothelial cells were exposed to unidirectional flow (20 dyn/cm<sup>2</sup>) for 48 h using yellow/green perfusion sets prior to the experiment. THP-1 monocytes were labelled with 1,1'-dioctadecyl-3,3,3',3'-tetramethylindocarbocyanine (Dil) for 15 min at 37°C, respectively, and after three times washing  $1 \times 10^6$  labelled cells were added to the flow reservoir for 30 min. After flow-termination, non-adherent cells were gently washed out with PBS, then cells were fixed with 4% paraformaldehyde and the number of cells adhering to both the straight and branched channel regions was assessed by fluorescence phase-contrast microscope quantified using ImageJ Software.

#### **Tube formation angiogenesis assay**

**(a) Conditioned media transfer experiment:** Tube formation by HAECs treated with  $\Delta$ menRNA and  $\Delta$ masRNA monocyte-conditioned media was assayed on reduced growth factor basement membrane extract (BME) in 96-well tissue cultured-treated clear-bottom plates ( $15 \times 10^3$  cells per well). Briefly, 60 µl of ice-cold BME was added per well and incubated at 37°C and 5% CO<sub>2</sub> for 30 min to allow gel formation. HAECs were plated on top of the gelled BME at a density of  $1.5 \times 10^4$  cells/well in 50 µl culture medium followed by transfer of 50 µl of monocyte-conditioned media of both  $\Delta$ menRNA and  $\Delta$ masRNA and incubated further for 24 h. After tube formation was observed, endothelial cells were stained by adding 50 µl of 6 µM Calcein AM solution per well for 15 min at 37°C. Tubular network of the cells was captured using a fluorescent inverted microscope and quantified by ImageJ Software.

**(b) Monocyte-HAEC co-cultures in matrigel:** Endothelial tube formation in reduced growth factor matrigel was performed similarly as described above. Here, direct Dil-labeled co-cultured  $\Delta$ menRNA and  $\Delta$ masRNA monocytes at a cell density of  $5 \times 10^3$  per well together with HAECs ( $1.5 \times 10^4$  cells/well) were added on the BME gel and cultured for 24 h at 37°C and 5% CO<sub>2</sub> to form tubular networks.

#### **Reactive oxygen species assay**

Intracellular ROS production in WT and CRISPR-Cas9 targeted THP-1 macrophages was determined as previously described using 2',7'-dichlorodihydrofluorescein diacetate (H<sub>2</sub>DCFDA). Upon cleavage of the acetate groups by intracellular esterases, the cell-permeant H<sub>2</sub>DCFDA is retained within the cells and easily oxidized to the highly fluorescent 2',7'-dichlorofluorescein (DCF) in response to ROS production/oxidative stress. Control and CRISPR/Cas9-targeted THP-1 cells were cultured in black 96 wells (overnight treatment with 0,1 µM PMA) before LPS addition for 24h. After washing with HBSS, cells were incubated with 5 µM H<sub>2</sub>DCFDA (Molecular Probes) in HBSS for 1 h at 37 °C. Cells were washed again and ROS production was induced by 400 µM H<sub>2</sub>O<sub>2</sub>. Fluorescence intensity was quantified every 10 min (excitation 485 nm, emission 535 nm) at 37°C using a fluorescence plate reader (Tecan).

### **Cytokine measurements**

Conditioned cell culture media of wildtype (WT) and CRISPR-Cas9 targeted THP-1 cells were tested for IFN $\gamma$ , TNF, IL6, MCP1, IL10, and IL12p70 by use of *Mouse Inflammation Cytometric Bead Assay (CBA)* (BD Biosciences, Heidelberg, Germany) on a *FACS Cantoll flow cytometer* (BD Biosciences) according to the manufacturer's protocol.

### **Cell proliferation studies**

The proliferation assay of WT and CRISPR-Cas9 targeted THP-1 cells was conducted as follows: 5 x10<sup>4</sup> cells were seeded into clear 96 well plates, one plate for each time point. Proliferation was determined using WST1 reagent (*Sigma-Aldrich*) according to the manufacturer's instructions. Absorbance at 450 nm was measured 2 h after addition of WST1 and incubation at 37°C on a *Tecan* plate reader. Absorbance of WT cells was set to one at each time point.

### **Foam cell formation and oxLDL uptake**

To induce foam cell formation, we seeded 5x10<sup>5</sup> THP-1 monocytes per well containing glass cover slips. Monocyte differentiation into macrophages was induced by adding 100 nM PMA to each well on days 0 and 1 and incubation for 48h hours. Thereafter the thus generated macrophages were washed with PBS, then incubated with 50 $\mu$ g/ml human ox-LDL for 24h in serum-free medium to induce foam cell formation. After ox-LDL incubation, Oil Red O staining (ORO) of the cells was performed as follows: wash with PBS, fix cells with 4% PFA/PBS for 15 min at RT, wash 3 times with PBS, rinse with 60% isopropanol for 15 s to facilitate the staining of neutral lipids, stain cells with filtered ORO working solution for 15 min at RT and in dark. ORO stock solution was prepared by dissolving 0.5 g ORO powder in 80 ml isopropanol (100%), mixed at 56 °C overnight, adjusted to 100 ml, mixed under gentle stirring, and filtered after pre-warming to 60°C. Working solution was prepared by diluting ORO stock solution with ddH<sub>2</sub>O 3:2 = factor 1.5. For staining, cells were rinsed with water and then hematoxylin used as a counterstain (cell nuclei) for 10 s. Destaining by washing with 60% isopropanol for 15 s, then PBS 3 times. Glass cover slips were taken out and mounted on slides for polarization microscopy and microphotography.

### **Monocyte-macrophage transition and macrophage polarization experiments**

Monocyte-M0 macrophage differentiation and subsequent M1/M2 macrophage polarization studies employing FACS and TaqMan were conducted as follows: First, M0 macrophages were generated by incubation of THP-1 monocyte clones for seven days, with PMA at a concentration of 100 ng/ml. Thereafter, the cells were further incubated for another seven days, either with IFN- $\gamma$  at 20 ng/ml plus LPS at 100 ng/ml to induce M1 polarization, or with IL-4 at 20 ng/ml plus IL-13 at 20 ng/ml to induce M2 polarization. The 'M0' TaqMan-based expression profiles and FACS data in Fig. 7 were obtained on day 7 of culture to characterize monocyte - M0 macrophage transition. The 'M1' and 'M2' expression profiles displayed there were obtained in day 14 of culture.

### **FACS analyses of the macrophage clones**

After macrophage polarization, cells were washed once with ice-cold PBS and scrapped off using a mini scraper. Subsequently, macrophages were again washed with PBS + 5% FBS and incubated with 50  $\mu$ l Fc $\gamma$ -receptor block (*BD Biosciences*) in PBS for 10 min at RT to block unspecific binding. Cells were centrifuged at 300 x g for 5 min at 4°C. Then cells pellets were resuspended with 50  $\mu$ l of FACS Buffer (PBS + 0,5%FBS + 0,05% NaN<sub>3</sub>) and stained with APC mouse anti-human CD14 (*BioLegend*), PE mouse anti-human CD11b (*BD Biosciences*) and Live/Dead Fixable Aqua Dead Cell Stain (*Invitrogen*) for 30 min at 4 °C in the dark. Cells were resuspended in 450  $\mu$ l of FACS Buffer and analyzed with Attune™ NxT Flow Cytometer (*Thermo Fisher Scientific*). Statistical analysis was performed using GraphPad



Prism 9 software. Experimental data were analyzed by using one-way analysis of variance (ANOVA) with Dunnett's post hoc test for multiple comparisons. The distribution of variables was assessed by Kolmogorov–Smirnov tests of normality.

#### **Human adenovirus and coxsackievirus B3 studies**

THP-1 cells were cultured in *RPMI 1640* medium (ATCC modification + 10 % fetal calf serum + 1 % P/S) at 37 °C, 5 % CO<sub>2</sub>. 5x10<sup>5</sup> cells were seeded in 12-well culture plates and differentiation to macrophage-like cells was triggered by addition of 0.1 µM PMA o/n. Afterwards cells were transduced with coxsackievirus B3 at MOI 30. Detection of CVB3 genome, replicative intermediates, and plaque forming units (PFU) was conducted as described. In the adenovirus experiments, cells were instead transduced with a recombinant adenoviral virus expressing GFP (AdV5-GFP) or an “empty” adenovector expressing no transgene, at MOI 25, 12h post PMA addition. Virus structures were described previously.

#### **RNA sequencing and data analysis**

For the transcriptome mapping of control vs. CRISPR-Cas9 generated  $\Delta$ menRNA or  $\Delta$ masRNA cells, four biological cell culture replicates were grown for each of the three clones. From each of these cultures separate total RNA isolations were conducted by *TRIZOL*/Chloroform method. Thereafter the individual RNA preps were pooled for each of the clones, and the three resulting RNA pools (control,  $\Delta$ menRNA,  $\Delta$ masRNA) were subsequently used for RNA-seq analyses as follows. RNA integrity was visualized using *Agilent Bioanalyzer 2100*. For NGS-library preparation we used *Illumina TruSeq Stranded Total RNA Library Prep* Human/Mouse/Rat (S45-S56) or *NEBNext Ultr II Directional RNA Library Prep* Kit Illumina (E7760S) in combination with the *NEBNext rRNA Depletion Kit* (Human/Mouse/Rat) (E6310L) (S145-S154). For all samples paired end (2x75bp) sequencing was carried out on an *Illumina NextSeq* platform using *NextSeq 500/550 High Output Kit* v2.5 (150 cycles). The resulting reads were mapped to the human genome (GRCh37 release 87/hg19) using *STAR* v2.7.5b with standard options. We then ran the *htseq-count* module from software package *HTSeq* with the stranded=reverse option reflecting the used library kit. As we used rRNA-depleted samples, all with rRNA-annotation were excluded from further analyses. To detect differentially expressed genes we used the R package *DESeq* v1.34.1. Next we normalized the raw gene specific read counts as Transcripts per Million base pairs (TPM) in order to perform a gene set enrichment analysis (GSEA) using the R package *ssGSEA2.0* by mapping them against a selection of gene set collections from *Molecular Signature Database (MsigDB)*. We thus generated Enrichment Scores (ES) for each sample and various gene sets. ES reflects how strongly the majority of genes from an individual gene set are expressed per regarded sample. This ES was then normalized to account for variations in gene set size. To correct for multiple testing the *ssGSEA* package uses Benjamini-Hochberg method, which calculates false discovery rates (FDR). For any combination of gene set and sample with a FDR value  $\geq 0.05$  we set the NES to zero. The gene set collections we used were: C2.CP: Canonical pathways; KEGG selection as a subset of CP; C2.CGP: chemical and genetic perturbations; C7: immunologic signature gene sets.

#### **Quantitative RT-PCR**

For quantitative gene expression analyses, isolated RNA was digested using *RNase free peqGOLD DNase I* (*Peqlab, Erlangen, Germany*) for 30 min to avoid genomic DNA contamination. To analyze the mRNA expression of target genes, 1 µg to 1,5 µg of total RNA was reverse transcribed using the *High Capacity RNA-to-cDNA* kit (*Life Technologies, Darmstadt, Germany*) according to the manufacturer's protocol and finally diluted to a concentration of 25 ng/µl. Assays for the following human target and reference genes were employed:

| RT-PCR target | Gene name                    | TaqMan assay ID |
|---------------|------------------------------|-----------------|
| AEN           | apoptosis enhancing nuclease | Hs00224322_m1   |
| AGO1          | argonaute RISC component 1   | Hs01084661_m1   |

|               |                                                             |               |
|---------------|-------------------------------------------------------------|---------------|
| AGO2          | argonaute RISC component 2                                  | Hs01085579_m1 |
| ANG           | angiogenin                                                  | Hs04195574_sH |
| ANGPT1        | angiopoietin 1                                              | Hs00919201_m1 |
| ANGPT4        | angiopoietin 4                                              | Hs00907074_m1 |
| ANGPTL4       | angiopoietin like 6                                         | Hs01101122_m1 |
| BOK           | BCL2 family apoptosis regulator BOK                         | Hs00261296_m1 |
| CIITA         | class II major histocompatibility complex transactivator    | Hs00931699_m1 |
| CCR5          | C-C motif chemokine receptor 5                              | Hs00152917_m1 |
| CCR7          | C-C motif chemokine receptor 7                              | Hs01013469_m1 |
| CD11b (ITGAM) | integrin subunit $\alpha_M$                                 |               |
| CD11c (ITGAX) | integrin subunit $\alpha_X$                                 |               |
| CD36 (SCARB3) | scavenger receptor                                          |               |
| CD64 (FCGR1A) | IgG Fc receptor 1                                           |               |
| CD80          | CTLA-4 counter-receptor                                     |               |
| CD93 (C1QR1)  |                                                             |               |
| CSF1 (MCSF)   | macrophage colony stimulating factor                        |               |
| CSF1R (CD115) | CSF1 receptor                                               |               |
| CTIF          | cap binding complex dependent translation initiation factor | Hs00969548_m1 |
| EEF1A2        | eukaryotic translation elongation factor 1 $\alpha_2$       | Hs00951287_m1 |
| EIF3CL        | eukaryotic translation initiation factor 3 subunit C like   | Hs01105769_g1 |
| ESAM          | endothelial cell adhesion molecule                          | Hs01113367_g1 |
| FAS           | Fas cell surface death receptor                             | Hs00236330_m1 |
| FASLG         | Fas ligand                                                  | Hs00181226_g1 |
| GADD45G       | growth arrest and DNA damage inducible $\gamma$             | Hs02566147_s1 |
| HDAC4         | histone deacetylase 4                                       | Hs01041648_m1 |
| HDAC 9        | histone deacetylase 9                                       | Hs01081548_g1 |
| ICAM1         | intercellular adhesion molecule 1                           | Hs00164932_m1 |
| ICAM2         | intercellular adhesion molecule 2                           | Hs00609563_m1 |
| ICAM3         | intercellular adhesion molecule 3                           | Hs00913466_g1 |
| ICAM4         | intercellular adhesion molecule 3                           | Hs05017468_s1 |
| IFIT1         | interferon induced protein with tetratricopeptide repeats 1 | Hs01911452_s1 |
| IFIT2         | interferon induced protein with tetratricopeptide repeats 2 | Hs01584837_s1 |
| IFIT3         | interferon induced protein with tetratricopeptide repeats 3 | Hs01922752_s1 |
| IFITM1        | interferon induced transmembrane protein 1                  | Hs00705137_s1 |
| IFITM2        | interferon induced transmembrane protein 2                  | Hs00829485_sH |
| IFITM3        | interferon induced transmembrane protein 3                  | Hs04194512_g1 |
| IFITM5        | interferon induced transmembrane protein 5                  | Hs00416846_m1 |
| IFNAR1        | interferon alpha and beta receptor subunit 1                | Hs01066116_m1 |
| IFNAR2        | interferon $\alpha$ and $\beta$ receptor subunit 2          | Hs01022059_m1 |
| IFNB1         | interferon beta 1                                           | Hs00277188_s1 |
| IFNG          | interferon gamma                                            | Hs00989291_m1 |
| IL1A          | interleukin 1A                                              | Hs00174092_m1 |
| IL1B          | interleukin 1B                                              | Hs01555410_m1 |

|              |                                                                     |               |
|--------------|---------------------------------------------------------------------|---------------|
| IL10         | interleukin 10                                                      | Hs00961619_m1 |
| IL18R1       | interleukin 18 receptor 1                                           | Hs00977691_m1 |
| IL18RAP      | interleukin 18 receptor accessory protein                           | Hs00187256_m1 |
| IL2          | interleukin 2                                                       | Hs00174114_m1 |
| IL2RB        | interleukin 2 receptor $\beta$                                      | Hs01081697_m1 |
| IL2RG        | interleukin 2 receptor $\gamma$                                     | Hs00415671_m1 |
| IL4R         | interleukin 4 receptor                                              | Hs00965057_m1 |
| IL6 (IFNB2)  | interleukin 6                                                       | Hs00174131_m1 |
| IL6R         | interleukin 6 receptor                                              | Hs01075664_m1 |
| IL8          | interleukin 8                                                       | Hs00174103_m1 |
| IRF3         | interferon regulatory factor 3                                      | Hs01547282_m1 |
| IRF7         | interferon regulatory factor 7                                      | Hs01014809_g1 |
| IRF9         | interferon regulatory factor 3                                      | Hs00196051_m1 |
| ISG15        | ISG15 ubiquitin like modifier                                       | Hs01921425_s1 |
| MAVS         | mitochondrial antiviral signaling protein                           | Hs00920075_m1 |
| MALAT1       | metastasis associated lung adenocarcinoma transcript 1              | Hs00273907_s1 |
| MCAM (CD146) | melanoma cell adhesion molecule                                     |               |
| MEFV         | MEFV innate immunity regulator pyrin                                | Hs00925524_m1 |
| MRC1 (CD206) | macrophage mannose receptor 1                                       |               |
| MSR1 (SR-A)  | macrophage scavenger receptor 1                                     |               |
| NAIP         | NLR family apoptosis inhibitory protein                             | Hs03037952_m1 |
| NCAM1        | neural cell adhesion molecule 1                                     | Hs00941830_m1 |
| NCAM2        | neural cell adhesion molecule 2                                     | Hs01562296_m1 |
| NEAT1        | nuclear paraspeckle assembly transcript 1                           | Hs01008264_s1 |
| NFATC2       | nuclear factor of activated T cells 2                               | Hs00905451_m1 |
| NOD2         | nucleotide binding oligomerization domain containing 2              | Hs01550753_m1 |
| NOS2         | nitric oxide synthase 2                                             | Hs01075529_m1 |
| NOS3         | nitric oxide synthase 3                                             | Hs01574665_m1 |
| NLRC3        | NLR family CARD domain containing 3                                 | Hs01054713_m1 |
| NLRC4        | NLR family CARD domain containing 4                                 | Hs00368367_m1 |
| NLRC5        | NLR family CARD domain containing 5                                 | Hs01072143_m1 |
| NT5C1A       | 5'-nucleotidase cytosolic 1A                                        | Hs00261369_m1 |
| OLR1 (LOX1)  | oxidized low density lipoprotein receptor 1                         |               |
| RIPK3        | receptor interacting serine/threonine kinase 3                      | Hs00179132_m1 |
| RLR1 (DDX58) | RIG-like receptor 1                                                 | Hs00204833_m1 |
| RLR2 (IFIH1) | RIG-like receptor 2                                                 | Hs01070332_m1 |
| RLR3 (DHX58) | RIG-like receptor 3                                                 | Hs00225561_m1 |
| ROCK1        | MARCKS cis-regulating lncRNA promoter of cytokines and inflammation |               |
| SERPING1     |                                                                     |               |
| SLFN12L      | schlafen family member 12 like                                      | Hs04334088_m1 |
| SLFN5        | schlafen family member 5                                            | Hs00288058_m1 |
| SOX4         | SRY-box transcription factor 4                                      | Hs05029754_s1 |
| TGFA         | transforming growth factor $\alpha$                                 | Hs00608187_m1 |

|               |                                            |               |
|---------------|--------------------------------------------|---------------|
| TGFB2         | transforming growth factor $\beta$ 2       | Hs00234244_m1 |
| TGFB1         | transforming growth factor $\beta$ induced | Hs00932747_m1 |
| TLR1 (LPRS)   |                                            |               |
| TLR2          | Toll-like receptor 2                       | Hs02621280_s1 |
| TLR8          | Toll-like receptor 8                       | Hs00152972_m1 |
| TLR9          | Toll-like receptor 9                       | Hs00152973_m1 |
| TLR10 (CD290) | Toll-like receptor 10                      |               |
| TNF (TNFSF2)  | tumour necrosis factor $\alpha$            | Hs00174128_m1 |
| TWIST2        | twist family bHLH transcription factor 2   | Hs02379973_s1 |
| VCAM          | vascular cell adhesion molecule 1          | Hs01003372_m1 |
| VEGFA         | vascular endothelial growth factor A       | Hs00900055_m1 |
| 18S           | 18S-RNA                                    | Hs9999901_s1  |
| GAPDH         | glyceraldehyde-3-phosphate dehydrogenase   | Hs99999905_m1 |
| HPRT1         | hypoxanthine phosphoribosyltransferase 1   | Hs01003267_m1 |

Expression levels measured by qPCR were quantified as delta-delta- $C_t$  values, determined by the  $C_t$  value of a candidate RNA minus the  $C_t$  of the reference gene.

### **Statistical analyses**

**Cell culture experiments:** Statistical data analyses were done using *IBM SPSS Statistics 24* or *GraphPad* software. Descriptive statistics include absolute and relative frequencies for categorial variables and mean and standard deviation, median, and range for quantitative measurements. For inter-group comparisons Student's t-test or the  $\chi^2$  test was used for quantitative or categorical variables, respectively. P-values  $\leq 0.05$  are considered significant, and no Bonferroni adjustment has been performed.

**Human molecular genetics:** Genome-wide association analyses of healthy samples versus samples with inflammatory, metabolic, and/or cardiovascular conditions were performed via logistic regression analysis implemented in *snptest* v2.5.2. For sensitivity analysis samples were stratified by sex. Summary-level results were meta-analyzed with *METAL* (Willer CJ, Li Y, Abecasis GR. *METAL: fast and efficient meta-analysis of genomewide association scans. Bioinformatics.* 2010;26:2190–1) using the classical approach which utilizes the effect size estimates and standard errors. Only variants with an imputation quality > 30% and Hardy-Weinberg equilibrium p-value > 0.0001 were included in the meta-analysis. Variants with p-value <  $5 \times 10^{-8}$  (the standard threshold) were considered to be genome-wide significant.

### **References regarding the methods**

1. M. C. Gundry *et al.*, Highly Efficient Genome Editing of Murine and Human Hematopoietic Progenitor Cells by CRISPR/Cas9. *Cell Rep* 17, 1453-1461 (2016).
2. L. Brunetti, M. C. Gundry, A. Kitano, D. Nakada, M. A. Goodell, Highly Efficient Gene Disruption of Murine and Human Hematopoietic Progenitor Cells by CRISPR/Cas9. *J Vis Exp* (2018).
3. M. Kespohl *et al.*, Protein modification with ISG15 blocks coxsackievirus pathology by antiviral and metabolic reprogramming. *Sci Adv* 6, eaay1109 (2020).
4. S. Pinkert *et al.*, Prevention of cardiac dysfunction in acute coxsackievirus B3 cardiomyopathy by inducible expression of a soluble coxsackievirus-adenovirus receptor. *Circulation* 120, 2358-2366 (2009).
5. D. Werk *et al.*, Combination of soluble coxsackievirus-adenovirus receptor and anti-coxsackievirus siRNAs exerts synergistic antiviral activity against coxsackievirus B3. *Antiviral Res* 83, 298-306 (2009).
6. H. Fechner *et al.*, Coxsackievirus B3 and adenovirus infections of cardiac cells are efficiently inhibited by vector-mediated RNA interference targeting their common receptor. *Gene Ther* 14, 960-971 (2007).
7. L. Suckau *et al.*, Long-term cardiac-targeted RNA interference for the treatment of heart failure restores cardiac function and reduces pathological hypertrophy. *Circulation* 119, 1241-1252 (2009).

8. A. Dobin *et al.*, STAR: ultrafast universal RNA-seq aligner. *Bioinformatics* 29, 15-21 (2013).
9. S. Anders, P. T. Pyl, W. Huber, HTSeq--a Python framework to work with high-throughput sequencing data. *Bioinformatics* 31, 166-169 (2015).
10. S. Anders, W. Huber, Differential expression analysis for sequence count data. *Genome Biol* 11, R106 (2010).
11. D. A. Barbie *et al.*, Systematic RNA interference reveals that oncogenic KRAS-driven cancers require TBK1. *Nature* 462, 108-112 (2009).
12. A. Subramanian *et al.*, Gene set enrichment analysis: a knowledge-based approach for interpreting genome-wide expression profiles. *Proc Natl Acad Sci U S A* 102, 15545-15550 (2005).
13. A. Liberzon *et al.*, Molecular signatures database (MSigDB) 3.0. *Bioinformatics* 27, 1739-1740 (2011).

### CRISPR-Cas9 target region to generate $\Delta$ menRNA cells

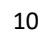

CRISPR-Cas9 target region to generate  $\Delta$ mascRNA cells

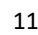

### Supplemental Figure S1C

#### Recombinant expression and Northern blot analysis of menRNA

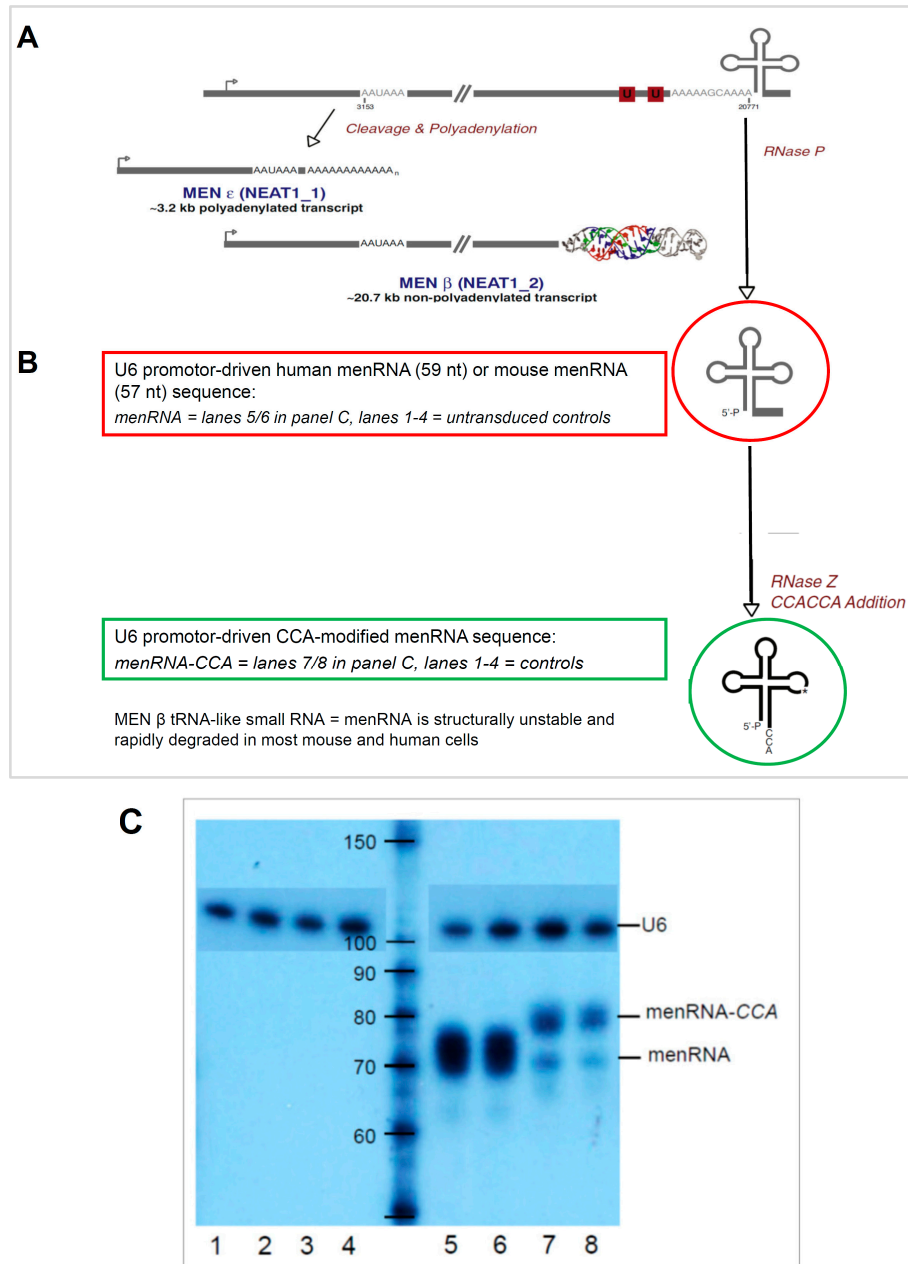

**Panel A:** Locations of two long primary transcripts from the *NEAT1* locus with size 3.7 kb and poly A tail (MEN ε), or size ≈23 kb and triple helical tail (MEN β). A tRNA-like 'menRNA' is enzymatically generated at the far 3' end of *NEAT1*. **Panel B:** Outline of the enzymatic biosynthesis of menRNA. This product is posttranscriptionally modified by CCA or CCACCA addition with CCACCA tagging it for rapid degradation (Wilusz *et al.* tRNAs marked with CCACCA are targeted for degradation. *Science* 2011;334:817-821 | Kuhn *et al.* On-enzyme refolding permits small RNA and tRNA surveillance by the CCA-adding enzyme. *Cell* 2015;160:644-658). **Panel C:** Northern blot analysis of HEK 293 cells transfected with recombinant adenovectors expressing menRNA (lanes 5/5) or menRNA±CCA (lanes 7/8). Lanes 1-4 show untransduced HEK 293 control cells. In these and several others including THP-1 cells there was no detectable menRNA. U6 RNA was employed as loading control.



## Supplemental Figure S2

Structure prediction for residual sequences in  $\Delta$ menRNA and  $\Delta$ masRNA cells

### Panel A

residual menRNA (human)

5'-ggcgctggtg gtggc**acgtc cagcacggct gggccgggg**tcgagtcccc gcagtgttg-3'

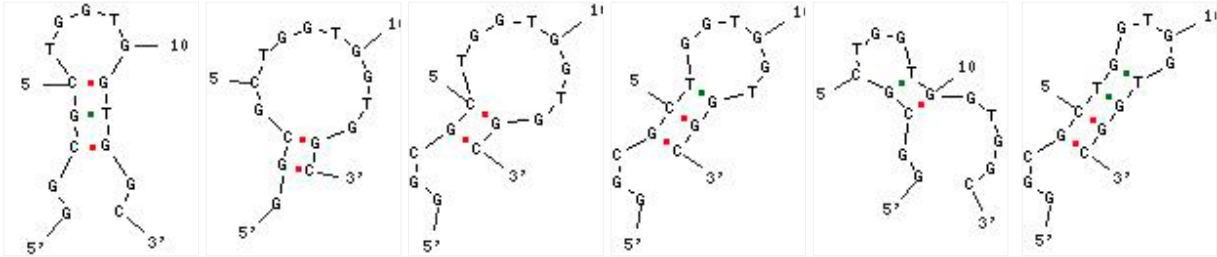

### Panel B

residual masRNA (human)

5'-GATGCTGGTGGTTGGCACTCCTGGTTTCCAGGACGGGGTTCAAATCCCTCGGGCGTCT-3'

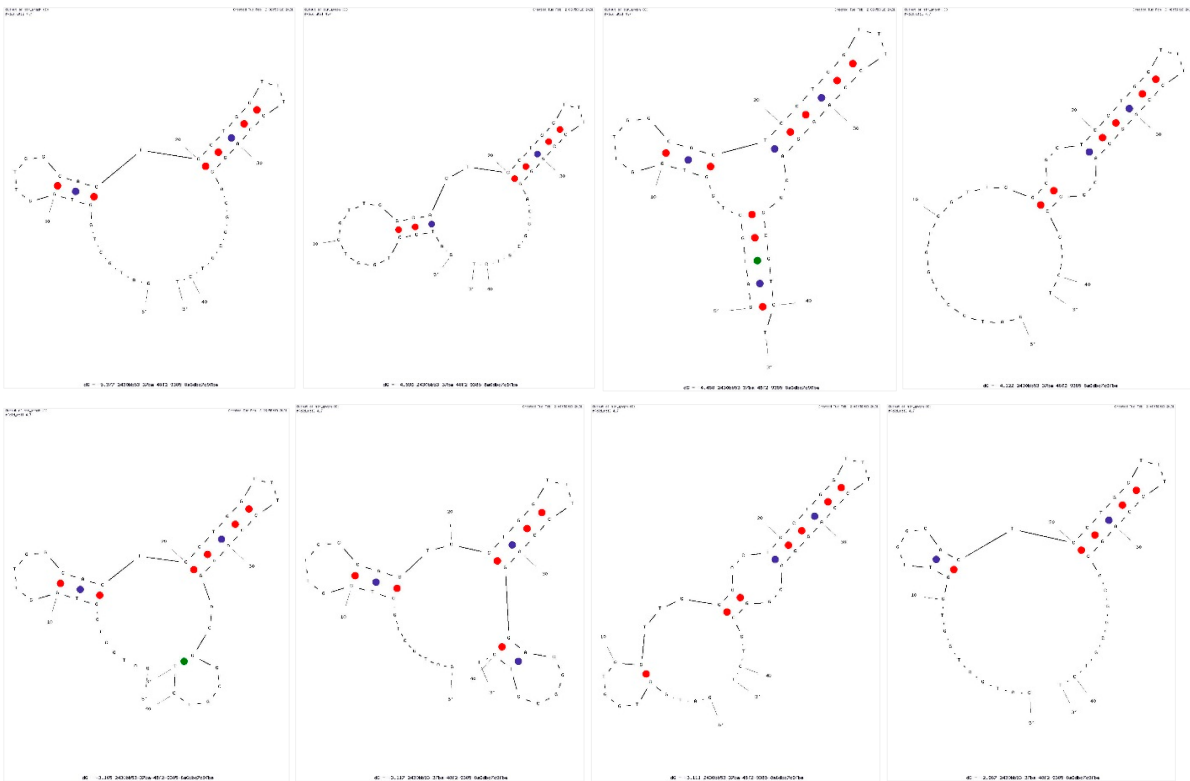

Possible structures acquired by sequence residues in  $\Delta$ menRNA and  $\Delta$ masRNA clones as predicted by OligoAnalyzer (IDT) <https://eu.idtdna.com/calc/analyzer>. None of these structures has resemblance with classical or atypical tRNAs.

### *In vitro* transcription of single-guide RNAs

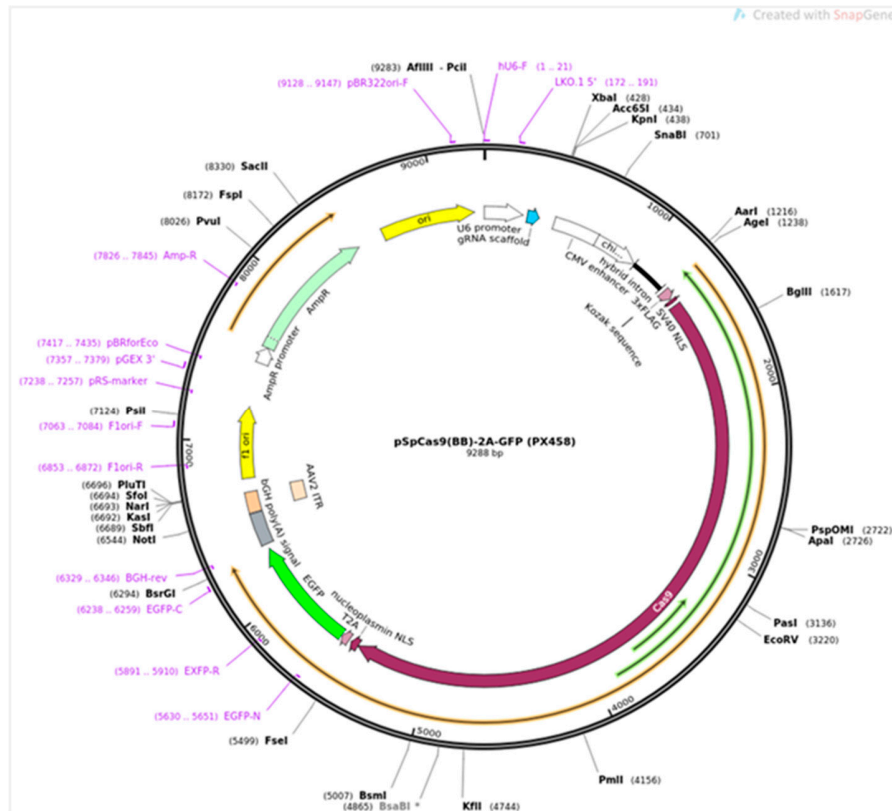

**Supplemental Figure S3B**

### PCR analysis of $\Delta$ menRNA and $\Delta$ mascRNA cells

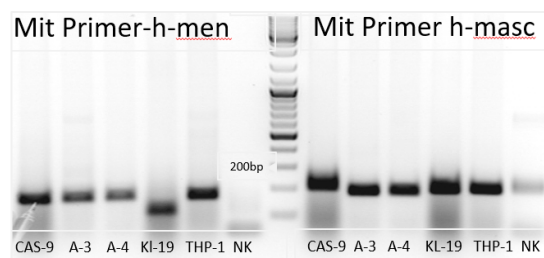

### Known sequence polymorphisms in the human menRNA and mascRNA sequences

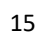

### Supplemental Figure S5

Outline regarding SNPs analyses in SHIP cohorts

| <b>SHIP genotypes</b> |                                              |                                                                |                       |
|-----------------------|----------------------------------------------|----------------------------------------------------------------|-----------------------|
|                       | GRCh38                                       | SNPs in <b>menRNA</b> (chr11: <b>65.445.541 - 65.445.598</b> ) |                       |
|                       | GRCh37                                       | $\Delta$ -222.234 $\Rightarrow$ 65.223.307 - 65.223.364        |                       |
|                       | GRCh38                                       | SNPs in <b>masRNA</b> (chr11: <b>65.506.117 - 65.506.174</b> ) |                       |
|                       | GRCh37                                       | $\Delta$ -222.234 $\Rightarrow$ 65.283.883 - 65.283.940        |                       |
| Gene                  | Build Chromosom:Position                     | cohort                                                         | variants* for 1KGp3v5 |
| <i>NEAT1</i>          | NR_002819.4                                  | SHIP-0                                                         | 19                    |
|                       | GRCh37 11:<br><b>65.190.269 - 65.194.003</b> | SHIP-Trend                                                     | 14                    |
|                       |                                              | SHIP-Trend (batch2)                                            | 13                    |
| <i>MALAT1</i>         | NR_131012.1                                  | SHIP-0                                                         | 43                    |
|                       | GRCh37 11:<br><b>65.265.224 - 65.273.940</b> | SHIP-Trend                                                     | 24                    |
|                       |                                              | SHIP-Trend (batch2)                                            | 32                    |

imputation panel for analyses: **1000G phase 3 version 5** (1KGp3v5)

**most of the variants in *NEAT1* and *MALAT1*** are rare, i.e. minor allele frequency (MAF) < 0.5 %

range of variants: ***start of NEAT1 - end of MALAT1*  $\pm$  10K bp** (i.e. 11: **65.180.269 - 65.283.940**)

meta analysis of all SHIP cohorts via logistic regression

adjusted for smoking status, (BMI)\*\* , (age)\*\* , (sex)\*\*

\* polymorphic variants only, \*\* if applicable

### Genetic heterogeneity of the *NEAT1-MALAT1* region in humans

SNPs available from the SHIP study for the *NEAT1-MALAT1* region, with their respective positions, are shown in Suppl. Fig. S6AB. No full sequence data for the specific target regions of the current study, i.e. *masRNA* and *menRNA*, are currently available for the SHIP general population or for any patient cohorts, although several SNP are known to occur *masRNA* and *menRNA* (Suppl. Fig. 4). Consistent with prior findings in cell culture and animal models (Gast *et al.* Immune system-mediated atherosclerosis caused by deficiency of long non-coding RNA *MALAT1* in ApoE<sup>-/-</sup> mice. Cardiovasc Res 2019;115: 302-314 | Cremer *et al.* Hematopoietic deficiency of the long noncoding RNA *MALAT1* promotes atherosclerosis and plaque inflammation. Circulation 2019;139:1320-1334), one *MALAT1* SNP with very low minor allele frequency (MAF=0.01) was associated (p=0.0062) with systemic low level inflammation (CRP>3.0 mg/L) (Suppl. Fig. S7). This SNP is located upstream of *MALAT1* in the promotor region regulating *MALAT1* expression (Suppl. Fig. S6A). Further, there was an association (p<0.01) of eight SNPs (low MAF=0.09 for all) within the *NEAT1* region with the phenotype of BMI >35 kg/m<sup>2</sup> and LDL >164 mg/dl (Suppl. Fig. S6B).

### Positions of *MALAT1* region SNPs analyzed in SHIP cohorts

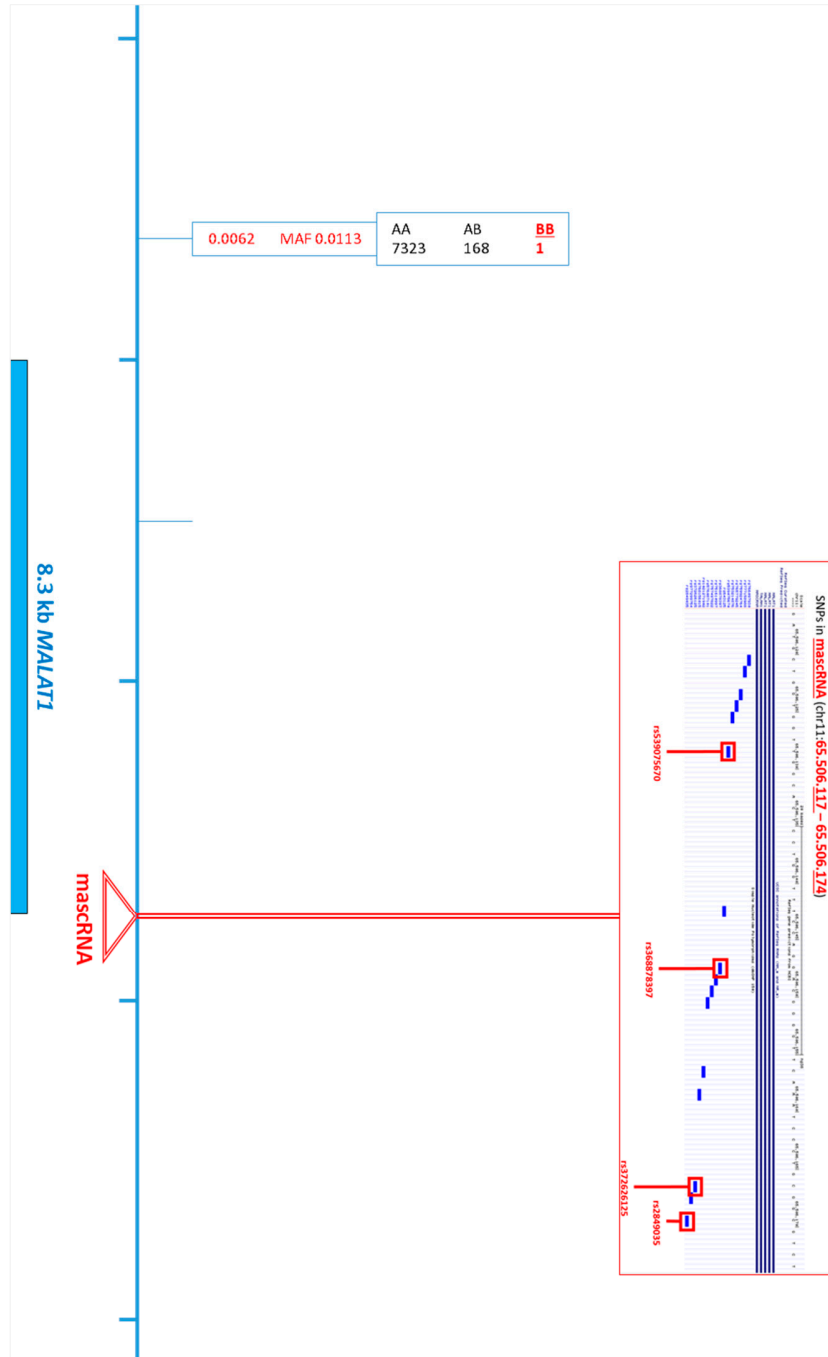

### Positions of *NEAT1* region SNPs analyzed in SHIP cohorts

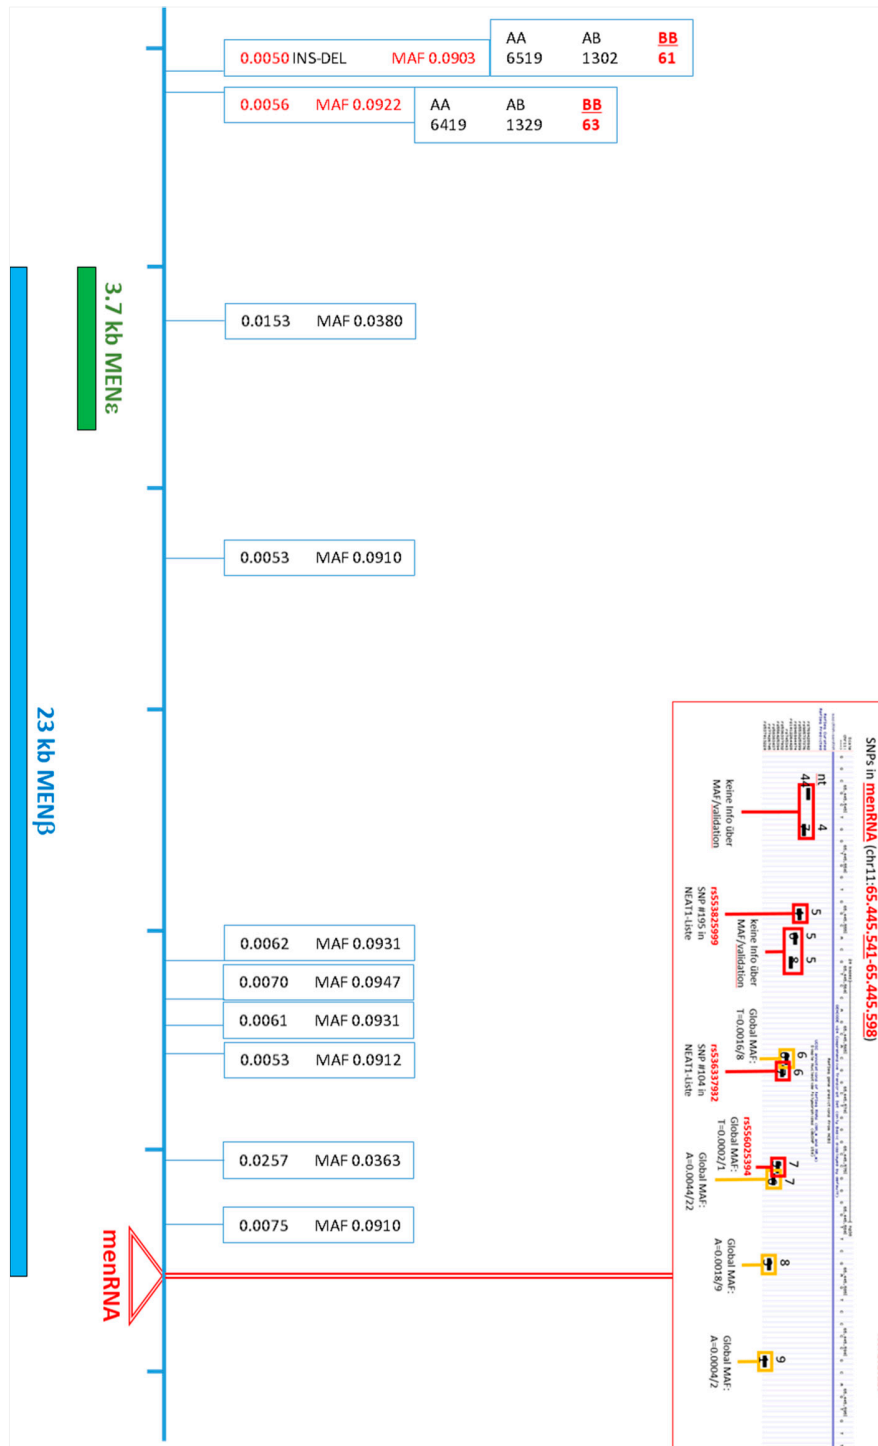

**Supplemental Figure S7**  
Human population genetic data

SNP associated with systemic low level inflammation **CRP >3.0 mg/L**

| rsID        | CHR | POS_GRCh38 | REF | ALT | MAF    | AA/AB/BB           | N    | beta   | se     | p-value       | gene          |
|-------------|-----|------------|-----|-----|--------|--------------------|------|--------|--------|---------------|---------------|
| rs113637620 | 11  | 65.495.816 | T   | C   | 0,0113 | 7323/168/ <b>1</b> | 7494 | 0,5087 | 0,1859 | <b>0,0062</b> | <i>MALAT1</i> |

SNPs associated with class II obesity **BMI >35 kg/m2** and **LDL >164 mg/dl**

| rsID                   | CHR | POS_GRCh38 | REF      | ALT      | MAF    | AA/AB/BB             | N    | beta    | se     | p-value       | gene         |
|------------------------|-----|------------|----------|----------|--------|----------------------|------|---------|--------|---------------|--------------|
| 11_65185874_IN_DE<br>L | 11  | 65.418.403 | GA       | <b>G</b> | 0,0903 | 6519/1302/ <b>61</b> | 7883 | -0,179  | 0,0638 | <b>0,0050</b> | <i>NEAT1</i> |
| rs508286               | 11  | 65.440.647 | A        | <b>G</b> | 0,0941 | 6463/1355/ <b>65</b> | 7883 | -0,172  | 0,0615 | <b>0,0052</b> | <i>NEAT1</i> |
| rs580933               | 11  | 65.429.413 | <b>C</b> | G        | 0,0912 | <b>62</b> /1315/6506 | 7883 | -0,1743 | 0,0625 | <b>0,0053</b> | <i>NEAT1</i> |
| rs550015               | 11  | 65.418.877 | <b>A</b> | G        | 0,0922 | <b>63</b> /1329/6491 | 7883 | -0,1757 | 0,0634 | <b>0,0056</b> | <i>NEAT1</i> |
| rs481335               | 11  | 65.439.998 | T        | <b>C</b> | 0,0931 | 6479/1340/ <b>64</b> | 7883 | -0,169  | 0,0617 | <b>0,0061</b> | <i>NEAT1</i> |
| rs673753               | 11  | 65.438.546 | C        | <b>T</b> | 0,0931 | 6479/1340/ <b>64</b> | 7883 | -0,1686 | 0,0616 | <b>0,0062</b> | <i>NEAT1</i> |
| rs475967               | 11  | 65.439.446 | A        | <b>G</b> | 0,0947 | 6454/1362/ <b>66</b> | 7883 | -0,1661 | 0,0616 | <b>0,0070</b> | <i>NEAT1</i> |
| rs550894               | 11  | 65.444.469 | C        | <b>A</b> | 0,0910 | 6510/1313/ <b>61</b> | 7883 | -0,1681 | 0,0629 | <b>0,0075</b> | <i>NEAT1</i> |

### Supplemental Figure S8A

Transduction of recombinant GFP-expressing adenovirus into CRISPR-Cas9-generated defective human macrophages

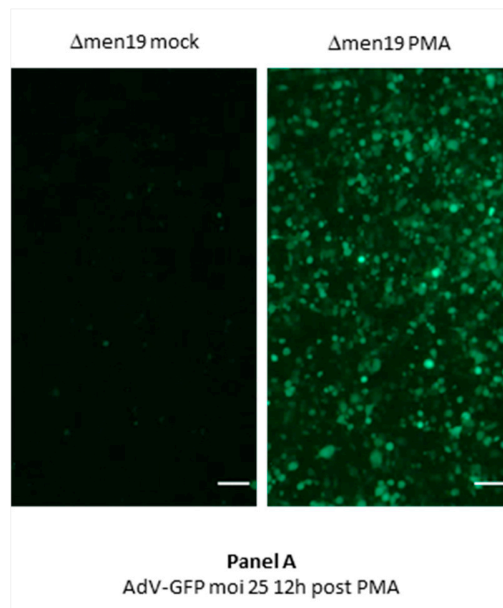

### Supplemental Figure S8B

Transduction of human coxsackievirus B3 into CRISPR-Cas9-generated defective human macrophages

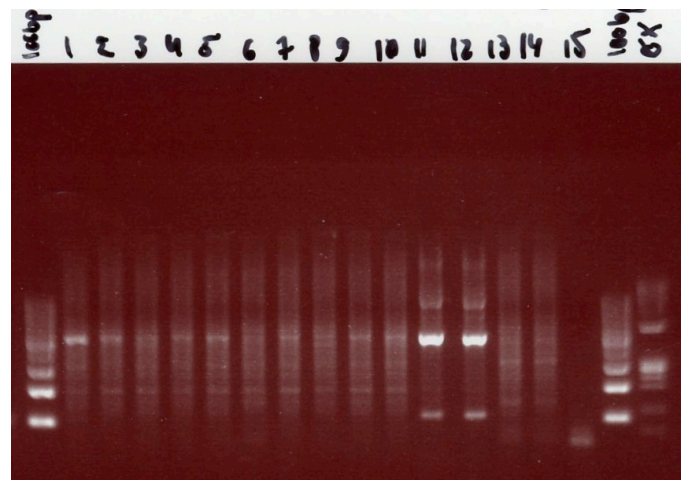

Marker: Øx bzw 100bp Peqlab  
 lane 1: Δmen19 cells + 30moi CVB3 (18.11.2020)  
 lane 2: Δmasc4 cells + 30moi CVB3 (18.11.2020)  
 lane 3: Δmasc3 cells + 30moi CVB3 (18.11.2020)  
 lane 4: cas 9 cells + 30moi CVB3 (18.11.2020)  
 lane 5: THP-1 cells + 30moi CVB3 (18.11.2020)  
 lane 6: Δmen19 cells + 30moi CVB3 (24.11.2020)  
 lane 7: Δmasc4 cells + 30moi CVB3 (24.11.2020)  
 lane 8: Δmasc3 cells + 30moi CVB3 (24.11.2020)  
 lane 9: cas 9 cells + 30moi CVB3 (24.11.2020)  
 lane 10: THP-1 cells + 30moi CVB3 (24.11.2020)  
 lanes 11+12: Vero cells + 30moi CVB3 (positive control)  
 lanes 13+14: Vero cells w/o CVB3 (negative control)  
 lane 15: water control PCR reagents  
 Expected fragment size for CVB3 replicative intermediates: 478bp



### Supplemental Figure S9A

Anomalous expression of innate immune sensor molecules and interferon-induced genes in  $\Delta$ menRNA and  $\Delta$ masRNA macrophages

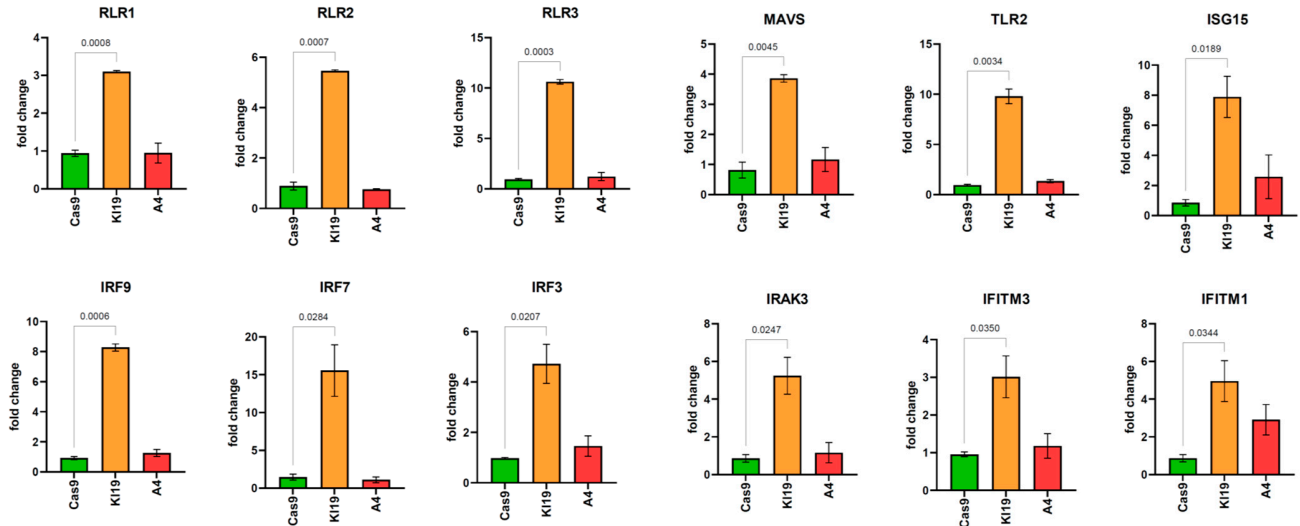

Upon PMA-induced differentiation of  $\Delta$ menRNA and  $\Delta$ masRNA monocytes into macrophages (Suppl. Fig. S8A), these displayed further disturbances of innate immune regulation under baseline conditions including constitutive induction of the cytosolic innate immune sensor molecules RLR1 (DEXD/H-box helicase DDX58), RLR2 (IFIH1; MDA-5), RLR3 (RNA helicase DHX58; LGP2), and MAVS (mitochondrial antiviral signaling protein). In  $\Delta$ menRNA macrophages several interferon (IFN) system genes were also constitutively upregulated up to ~15-fold: the IFN regulatory factors IRF3, IRF7, and IRF9; IFN-stimulated gene ISG15; IFN-induced transmembrane proteins IFITM1 and IFITM3. In  $\Delta$ menRNA macrophages several interferon (IFN) system genes were also constitutively upregulated up to ~15-fold: the IFN regulatory factors IRF3, IRF7, and IRF9; IFN-stimulated gene ISG15; IFN-induced transmembrane proteins IFITM1, IFITM3; and GVINP1. Bar graphs show means  $\pm$  SE from three biological replicates.

# Supplemental Figure S9B

FACS analysis of  $\Delta$ menRNA and  $\Delta$ mascrRNA monocyte to M0 macrophage transition

M0 Mφ derived from control monocytes

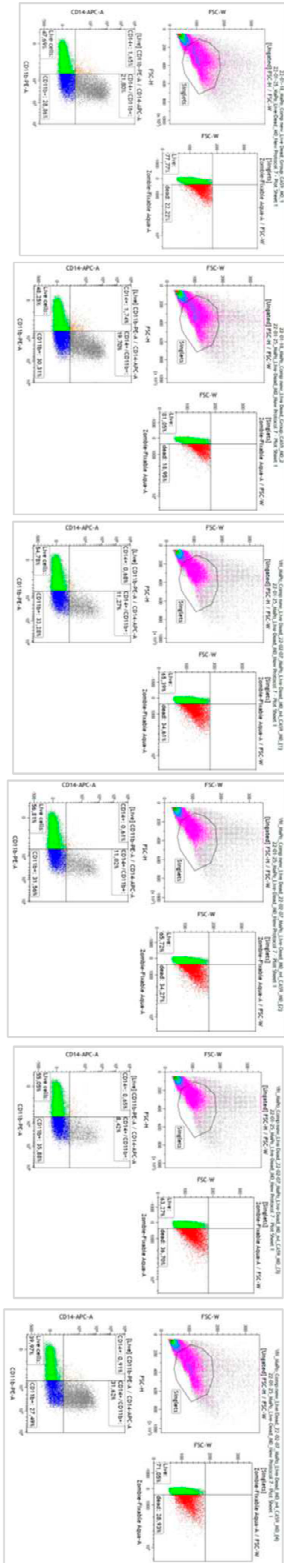

M0 Mφ derived from  $\Delta$ menRNA monocytes

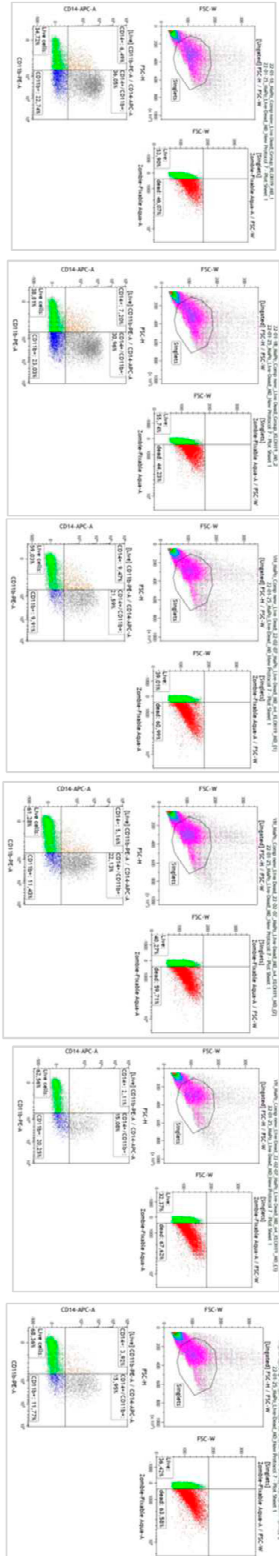

M0 Mφ derived from  $\Delta$ mascrRNA monocytes

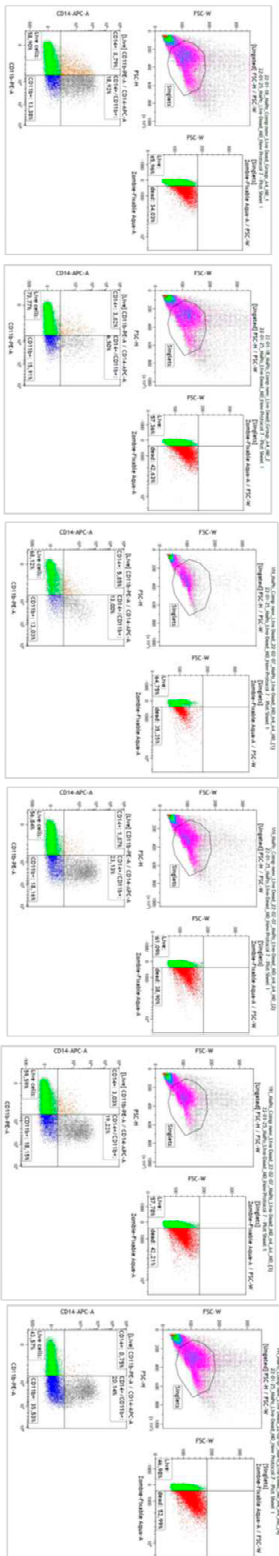

**Supplemental Table S1**  
RNA-seq FPKM data for  $\Delta$ menRNA monocytes

S1A - Innate immune sensors

| BASELINE |                                                          | control | $\Delta$ men19 | ratio  |
|----------|----------------------------------------------------------|---------|----------------|--------|
| CIITA    | class II major histocompatibility complex transactivator | 6,669   | 115,166        | 17,270 |
| NOD2     | nucleotide binding oligomerization domain containing 2   | 21,117  | 157,454        | 7,456  |
| NLRC5    | NLR family CARD domain containing 5                      | 230,068 | 870,944        | 3,786  |
| TLR2     | toll like receptor 2                                     | 379,000 | 1299,218       | 3,428  |
| PYCARD   | PYD and CARD domain containing                           | 368,997 | 147,557        | 0,400  |
| CARD10   | caspase recruitment domain family member 10              | 33,343  | 8,997          | 0,270  |
| NAIP     | NLR family apoptosis inhibitory protein                  | 54,460  | 8,997          | 0,165  |
| NLRC4    | NLR family CARD domain containing 4                      | 33,343  | 5,398          | 0,162  |
| MEFV     | MEFV innate immunity regulator, pyrin                    | 240,071 | 32,390         | 0,135  |
| NLRC3    | NLR family CARD domain containing 3                      | 185,610 | 14,396         | 0,078  |

| LPS100  |                                                        | control | $\Delta$ men19 | ratio |
|---------|--------------------------------------------------------|---------|----------------|-------|
| BOK     | BCL2 family apoptosis regulator BOK                    | 2,404   | 17,473         | 7,269 |
| NOD2    | nucleotide binding oligomerization domain containing 2 | 68,505  | 321,171        | 4,688 |
| FAM129C | niban apoptosis regulator 3                            | 2,404   | 9,985          | 4,154 |
| NLRC5   | NLR family CARD domain containing 5                    | 292,050 | 1161,542       | 3,977 |
| PYCARD  | PYD and CARD domain containing                         | 760,771 | 371,926        | 0,489 |
| RIPK3   | receptor interacting serine/threonine kinase 3         | 137,011 | 34,114         | 0,249 |
| NAIP    | NLR family apoptosis inhibitory protein                | 69,707  | 16,641         | 0,239 |
| CARD14  | caspase recruitment domain family member 14            | 4,807   | 0,832          | 0,173 |
| TLR1    | toll like receptor 1                                   | 104,561 | 15,809         | 0,151 |
| NLRC4   | NLR family CARD domain containing 4                    | 63,698  | 6,656          | 0,104 |
| MEFV    | MEFV innate immunity regulator, pyrin                  | 301,664 | 26,626         | 0,088 |
| MPEG1   | macrophage expressed 1                                 | 212,728 | 16,641         | 0,078 |
| TLR8    | toll like receptor 8                                   | 32,450  | 2,496          | 0,077 |
| TLR10   | toll like receptor 10                                  | 10,817  | 0,832          | 0,077 |
| NLRC3   | NLR family CARD domain containing 3                    | 137,011 | 4,160          | 0,030 |
| TLR7    | toll like receptor 7                                   | 4,807   | 0,000          |       |

S1B – Transcription and nuclear factors, epigenetic modifiers

| BASELINE |                                                                 | control | men19   | ratio  |
|----------|-----------------------------------------------------------------|---------|---------|--------|
| GDAP1L1  | ganglioside induced differentiation associated protein 1 like 1 | 0,000   | 17,995  |        |
| HDAC11   | histone deacetylase 11                                          | 0,000   | 3,599   |        |
| GCM1     | glial cells missing transcription factor 1                      | 0,000   | 8,098   |        |
| SIM1     | SIM bHLH transcription factor 1                                 | 0,000   | 8,098   |        |
| CCPG1    | cell cycle progression 1                                        | 52,238  | 556,936 | 10,662 |
| NPDC1    | neural proliferation, differentiation and control 1             | 4,446   | 44,987  | 10,119 |
| MTURN    | maturin, neural progenitor differentiation regulator homolog    | 24,452  | 233,931 | 9,567  |
| RGCC     | regulator of cell cycle                                         | 6,669   | 51,285  | 7,690  |
| GATA2    | GATA binding protein 2                                          | 21,117  | 91,773  | 4,346  |

|         |                                                           |         |         |       |
|---------|-----------------------------------------------------------|---------|---------|-------|
| NFATC2  | nuclear factor of activated T cells 2                     | 563,499 | 120,565 | 0,214 |
| METTL7B | methyltransferase like 7B                                 | 166,716 | 33,290  | 0,200 |
| TBX15   | T-box transcription factor 15                             | 73,355  | 13,496  | 0,184 |
| GATA6   | GATA binding protein 6                                    | 10,003  | 1,799   | 0,180 |
| HIC1    | HIC ZBTB transcriptional repressor 1                      | 5,557   | 0,900   | 0,162 |
| SOX4    | SRY-box transcription factor 4                            | 868,033 | 134,960 | 0,155 |
| EBF1    | EBF transcription factor 1                                | 6,669   | 0,900   | 0,135 |
| SPIB    | Spi-B transcription factor                                | 14,449  | 1,799   | 0,125 |
| HDAC9   | histone deacetylase 9                                     | 332,320 | 39,588  | 0,119 |
| TWIST2  | twist family bHLH transcription factor 2                  | 17,783  | 1,799   | 0,101 |
| TFAP2C  | transcription factor AP-2 gamma                           | 25,563  | 1,799   | 0,070 |
| GDAP1   | ganglioside induced differentiation associated protein 1  | 100,029 | 5,398   | 0,054 |
| SAMSN1  | SAM domain, SH3 domain and nuclear localization signals 1 | 184,499 | 5,398   | 0,029 |
| KDM5D   | lysine demethylase 5D                                     | 553,496 | 0,900   | 0,002 |

|        |                                                              |          |                |       |
|--------|--------------------------------------------------------------|----------|----------------|-------|
| LPS100 |                                                              | control  | $\Delta$ men19 | ratio |
| MNDA   | myeloid cell nuclear differentiation antigen                 | 245,177  | 1499,355       | 6,115 |
| MTURN  | maturin, neural progenitor differentiation regulator homolog | 51,680   | 255,439        | 4,943 |
| RAVER2 | ribonucleoprotein, PTB binding 2                             | 87,735   | 428,506        | 4,884 |
| RNASE2 | ribonuclease A family member 2                               | 567,273  | 2410,450       | 4,249 |
| HDAC4  | histone deacetylase 4                                        | 676,642  | 2322,252       | 3,432 |
| GATA2  | GATA binding protein 2                                       | 33,652   | 114,823        | 3,412 |
| HDAC9  | histone deacetylase 9                                        | 403,822  | 86,533         | 0,214 |
| GATA3  | GATA binding protein 3                                       | 22,835   | 2,496          | 0,109 |
| NFATC2 | nuclear factor of activated T cells 2                        | 1471,065 | 78,213         | 0,053 |
| GATA6  | GATA binding protein 6                                       | 16,826   | 0,832          | 0,049 |
| DNASE2 | deoxyribonuclease 2, lysosomal                               | 379,785  | 14,145         | 0,037 |
| SAMSN1 | SAM domain, SH3 domain and nuclear localization signals 1    | 627,366  | 17,473         | 0,028 |
| TWIST2 | twist family bHLH transcription factor 2                     | 61,294   | 1,664          | 0,027 |
| KDM5D  | lysine demethylase 5D                                        | 656,210  | 14,977         | 0,023 |

S1C – Translation and ribosomal factors, nucleic acid modifiers

|          |                                                             |          |                |       |
|----------|-------------------------------------------------------------|----------|----------------|-------|
| BASELINE |                                                             | control  | $\Delta$ men19 | ratio |
| NSUN7    | NOP2/Sun RNA methyltransferase family member 7              | 0,000    | 22,493         |       |
| EEF1A2   | eukaryotic translation elongation factor 1 alpha 2          | 13,337   | 92,673         | 6,948 |
| CTIF     | cap binding complex dependent translation initiation factor | 45,569   | 269,021        | 5,904 |
| PPARGC1A | PPARG coactivator 1 alpha                                   | 11,114   | 55,784         | 5,019 |
| SARS     | seryl-tRNA synthetase 1 - serine                            | 536,824  | 2288,927       | 4,264 |
| AARS     | alanyl-tRNA synthetase 1 - alanine                          | 1134,778 | 3961,535       | 3,491 |
| RNASE2   | ribonuclease A family member 2                              | 530,156  | 1765,281       | 3,330 |
| GARS     | glycyl-tRNA synthetase 1 - glycine                          | 821,353  | 2439,183       | 2,970 |
| TRMT61A  | tRNA methyltransferase 61A                                  | 118,924  | 42,288         | 0,356 |
| TRMT2B   | tRNA methyltransferase 2 homolog B                          | 261,188  | 82,776         | 0,317 |
| RIMKLA   | ribosomal modification protein rimK like family member A    | 27,786   | 4,499          | 0,162 |

|          |                                                          |          |          |       |
|----------|----------------------------------------------------------|----------|----------|-------|
| MT-TD    | mitochondrially encoded tRNA Asp (GAU/C) - aspartic acid | 6,669    | 0,900    | 0,135 |
| DNASE2   | deoxyribonuclease 2 lysosomal                            | 76,689   | 9,897    | 0,129 |
| MT-TE    | mitochondrially encoded tRNA Glu (GAA/G) - glutamic acid | 8,892    | 0,900    | 0,101 |
| DDX3Y    | DEAD-box helicase 3 Y-linked                             | 986,957  | 2,699    | 0,003 |
| RPS4Y1   | ribosomal protein S4 Y-linked 1                          | 1050,309 | 0,900    | 0,001 |
| EIF1AY   | eukaryotic translation initiation factor 1A Y-linked     | 152,267  | 0,000    |       |
| LPS100   |                                                          |          |          |       |
| NT5E     | 5'-nucleotidase ecto                                     | 9,615    | 54,083   | 5,625 |
| RAVER2   | ribonucleoprotein, PTB binding 2                         | 87,735   | 428,506  | 4,884 |
| RNASE2   | ribonuclease A family member 2                           | 567,273  | 2410,450 | 4,249 |
| MT-TV    | mitochondrially encoded tRNA Val (GUN) - valine          | 1,202    | 4,992    | 4,154 |
| MT-TY    | mitochondrially encoded tRNA Tyr (UAU/C) - tyrosine      | 1,202    | 4,992    | 4,154 |
| PPARGC1A | PPARG coactivator 1 alpha                                | 9,615    | 35,778   | 3,721 |
| MT-TM    | mitochondrially encoded tRNA Met (AUA/G) - methionine    | 14,422   | 4,160    | 0,288 |
| METTL7B  | methyltransferase like 7B                                | 359,353  | 95,686   | 0,266 |
| TPMT     | thiopurine S-methyltransferase                           | 322,096  | 75,717   | 0,235 |
| RNASE6   | ribonuclease A family member k6                          | 27,643   | 3,328    | 0,120 |
| MT-TD    | mitochondrially encoded tRNA Asp (GAU/C) - aspartic acid | 21,633   | 1,664    | 0,077 |
| DNASE2   | deoxyribonuclease 2 lysosomal                            | 379,785  | 14,145   | 0,037 |
| EIF1AY   | eukaryotic translation initiation factor 1A Y-linked     | 167,057  | 4,992    | 0,030 |
| DDX3Y    | DEAD-box helicase 3 Y-linked                             | 1022,775 | 28,290   | 0,028 |
| RPS4Y1   | ribosomal protein S4 Y-linked 1                          | 1044,408 | 23,297   | 0,022 |

S1D - Long noncoding RNAs, antisense transcripts, microRNAs

| BASELINE     |                                                                                         | control | $\Delta$ men19 | ratio |
|--------------|-----------------------------------------------------------------------------------------|---------|----------------|-------|
| MIR146A      | MIR3142 host gene                                                                       | 0,000   | 51,285         |       |
| MIR616       | microRNA 616                                                                            | 0,000   | 26,992         |       |
| RP11-1L12.3  | BBOX1 antisense RNA 1                                                                   | 0,000   | 15,296         |       |
| VAC14-AS1    | VAC14 antisense RNA 1                                                                   | 0,000   | 14,396         |       |
| AC008174.3   | FSIP2 antisense RNA 1                                                                   | 0,000   | 11,697         |       |
| MIR181A1HG   |                                                                                         | 105,587 | 19,794         | 0,187 |
| RP1-249H1.4  | MARCKS cis regulating lncRNA promoter of cytokines and inflammation (ROCKI)             | 102,252 | 15,296         | 0,150 |
| DGUOK-AS1    | DGUOK antisense RNA 1                                                                   | 12,226  | 1,799          | 0,147 |
| PCED1B-AS1   | PCED1B antisense RNA 1                                                                  | 524,599 | 58,483         | 0,111 |
| SENCR        | smooth muscle and endothelial cell enriched migration/differentiation-associated lncRNA | 11,114  | 0,900          | 0,081 |
| IL10RB-AS1   |                                                                                         | 14,449  | 0,900          | 0,062 |
| IL12A-AS1    | IL12A antisense RNA 1                                                                   | 47,792  | 1,799          | 0,038 |
| LPS100       |                                                                                         | control | $\Delta$ men19 | ratio |
| PCED1B-AS1   | PCED1B antisense RNA 1                                                                  | 343,729 | 69,892         | 0,203 |
| RP1-249H1.4  | MARCKS cis regulating lncRNA promoter of cytokines and inflammation (ROCKI)             | 82,928  | 15,809         | 0,191 |
| RP4-612B15.3 | CLCA4 antisense RNA 1                                                                   | 8,413   | 0,832          | 0,099 |
| KIF25-AS1    | KIF25 antisense RNA 1                                                                   | 12,019  | 0,832          | 0,069 |

|               |                                       |        |       |       |
|---------------|---------------------------------------|--------|-------|-------|
| RP11-366L20.2 | HMGA2 antisense RNA 1                 | 66,102 | 4,160 | 0,063 |
| RP11-82L2.1   | SMC2 antisense RNA 1 (head to head)   | 16,826 | 0,832 | 0,049 |
| IL12A-AS1     | IL12A antisense RNA 1                 | 63,698 | 0,832 | 0,013 |
| DPP10-AS1     | DPP10 antisense RNA 1                 | 8,413  | 0,000 |       |
| ZNF582-AS1    | ZNF582 antisense RNA 1 (head to head) | 7,211  | 0,000 |       |

S1E – Interleukins and TNF systems, interferon-induced genes

| BASELINE  |                                                            | control | $\Delta$ men19 | ratio  |
|-----------|------------------------------------------------------------|---------|----------------|--------|
| ADAMTS20  | ADAM metalloproteinase with thrombospondin type 1 motif 20 | 0,000   | 19,794         |        |
| IL8       | C-X-C motif chemokine ligand 8                             | 1,111   | 19,794         | 17,810 |
| SLFN12L   | schlafen family member 12 like                             | 0,000   | 22,493         |        |
| C1QTNF3   | C1q and TNF related 3                                      | 16,672  | 82,776         | 4,965  |
| TNFAIP8   | TNF alpha induced protein 8                                | 315,648 | 1485,463       | 4,706  |
| TNF       | tumor necrosis factor                                      | 216,730 | 510,150        | 2,354  |
| TNFK      | TRAF2 and NCK interacting kinase                           | 154,490 | 55,784         | 0,361  |
| TNFSF13   | TNF superfamily member 13                                  | 17,783  | 3,599          | 0,202  |
| ADAMTS4   | ADAM metalloproteinase with thrombospondin type 1 motif 4  | 12,226  | 1,799          | 0,147  |
| IL4R      | interleukin 4 receptor                                     | 198,947 | 27,892         | 0,140  |
| TNFRSF10C | TNF receptor superfamily member 10c                        | 6,669   | 0,900          | 0,135  |
| IL16      | interleukin 16                                             | 54,460  | 7,198          | 0,132  |
| ADAM21    | ADAM metalloproteinase domain 21                           | 8,892   | 0,900          | 0,101  |
| IL1RN     | interleukin 1 receptor antagonist                          | 156,713 | 12,596         | 0,080  |
| IL18R1    | interleukin 18 receptor 1                                  | 48,903  | 3,599          | 0,074  |
| IL2RB     | interleukin 2 receptor subunit beta                        | 20,006  | 0,900          | 0,045  |
| IL12A-AS1 | IL12A antisense RNA 1                                      | 47,792  | 1,799          | 0,038  |
| ADAM28    | ADAM metalloproteinase domain 28                           | 28,897  | 0,900          | 0,031  |
| ADAMTS9   | ADAM metalloproteinase with thrombospondin type 1 motif 9  | 526,822 | 5,398          | 0,010  |

| LPS100   |                                                            | control | $\Delta$ men19 | ratio  |
|----------|------------------------------------------------------------|---------|----------------|--------|
| TNFRSF19 | TNF receptor superfamily member 19                         | 0,000   | 5,824          |        |
| SLFN12L  | schlafen family member 12 like                             | 1,202   | 30,786         | 25,615 |
| IL9R     | interleukin 9 receptor                                     | 1,202   | 8,321          | 6,923  |
| IL17D    | interleukin 17D                                            | 1,202   | 7,488          | 6,231  |
| IL20RA   | interleukin 20 receptor subunit alpha                      | 1,202   | 4,992          | 4,154  |
| TNFAIP8  | TNF alpha induced protein 8                                | 430,262 | 1611,681       | 3,746  |
| IL8      | C-X-C motif chemokine ligand 8                             | 9,615   | 30,786         | 3,202  |
| ADAMTS5  | ADAM metalloproteinase with thrombospondin type 1 motif 5  | 14,422  | 4,160          | 0,288  |
| ADAMTS4  | ADAM metalloproteinase with thrombospondin type 1 motif 4  | 7,211   | 1,664          | 0,231  |
| IL4R     | interleukin 4 receptor                                     | 399,014 | 72,388         | 0,181  |
| ADAMTS10 | ADAM metalloproteinase with thrombospondin type 1 motif 10 | 90,139  | 13,313         | 0,148  |
| IL10RA   | interleukin 10 receptor subunit alpha                      | 198,305 | 28,290         | 0,143  |
| IRAK2    | interleukin 1 receptor associated kinase 2                 | 93,744  | 10,817         | 0,115  |
| SLFN5    | schlafen family member 5                                   | 292,050 | 29,122         | 0,100  |
| IL4I1    | interleukin 4 induced 1                                    | 486,749 | 43,267         | 0,089  |

|          |                                                           |         |        |       |
|----------|-----------------------------------------------------------|---------|--------|-------|
| TNFRSF25 | TNF receptor superfamily member 25                        | 82,928  | 6,656  | 0,080 |
| IL2RG    | interleukin 2 receptor subunit gamma                      | 10,817  | 0,832  | 0,077 |
| IL21R    | interleukin 21 receptor                                   | 55,285  | 4,160  | 0,075 |
| ADAMTS9  | ADAM metalloproteinase with thrombospondin type 1 motif 9 | 462,712 | 29,954 | 0,065 |
| ADAM28   | ADAM metalloproteinase domain 28                          | 222,342 | 11,649 | 0,052 |
| IL16     | interleukin 16                                            | 135,809 | 7,488  | 0,055 |
| TNFRSF9  | TNF receptor superfamily member 9                         | 20,431  | 0,832  | 0,041 |
| IL2RB    | interleukin 2 receptor subunit beta                       | 43,267  | 0,832  | 0,019 |
| TNIP3    | TNFAIP3 interacting protein 3                             | 93,744  | 1,664  | 0,018 |
| IL18R1   | interleukin 18 receptor 1                                 | 58,891  | 0,832  | 0,014 |
| ADAMTS3  | ADAM metalloproteinase with thrombospondin type 1 motif 3 | 10,817  | 0,000  |       |
| IL18RAP  | interleukin 18 receptor accessory protein                 | 7,211   | 0,000  |       |

S1F – Cluster of differentiation and other leukocyte markers

| <b>BASILINE</b> |                                                        | control | $\Delta$ men19 | ratio  |
|-----------------|--------------------------------------------------------|---------|----------------|--------|
| CD93            |                                                        | 42,235  | 1454,872       | 34,483 |
| MARCO           | macrophage receptor with collagenous structure = SR-A6 | 21,594  | 2,223          | 9,709  |
| FCGR2C          | Fc fragment of IgG receptor IIc                        | 10,003  | 1,799          | 0,180  |
| C8G             | complement C8 gamma chain                              | 5,557   | 0,900          | 0,162  |
| CD52            | CD52 molecule                                          | 56,683  | 8,997          | 0,159  |
| LILRB1          | leukocyte immunoglobulin like receptor B1              | 34,455  | 5,398          | 0,157  |
| LILRA1          | leukocyte immunoglobulin like receptor A1              | 163,381 | 22,493         | 0,138  |
| KIAA1462        | junctional cadherin 5 associated                       | 202,282 | 26,092         | 0,129  |
| KIAA1462        | junctional cadherin 5 associated                       | 202,282 | 26,092         | 0,129  |
| CD40            | CD40 molecule                                          | 71,132  | 8,098          | 0,114  |
| CD53            | CD53 molecule                                          | 671,308 | 70,179         | 0,105  |
| CD248           | CD248 molecule                                         | 8,892   | 0,900          | 0,101  |
| MPEG1           | macrophage expressed 1                                 | 14,449  | 0,900          | 0,062  |
| CD300A          | CD300a molecule                                        | 417,901 | 23,393         | 0,056  |
| CD300LB         | CD300 molecule like family member b                    | 18,894  | 0,900          | 0,048  |
| CD180           | CD180 molecule                                         | 296,754 | 8,098          | 0,027  |
| CD36            | scavenger receptor (SR-B2)                             | 300,088 | 6,298          | 0,021  |
| CFP             | complement factor properdin                            | 104,475 | 1,799          | 0,017  |
| LILRB2          | leukocyte immunoglobulin like receptor B2              | 60,018  | 0,900          | 0,015  |
| PCDH10          | protocadherin 10                                       | 316,760 | 3,599          | 0,011  |
| FCGR2B          | Fc fragment of IgG receptor IIb                        | 12,226  | 0,000          |        |

| <b>LPS100</b> |                                                        | control | $\Delta$ men19 | ratio |
|---------------|--------------------------------------------------------|---------|----------------|-------|
| MARCO         | macrophage receptor with collagenous structure = SR-A6 | 0,000   | 8,321          |       |
| C1R           | complement C1r                                         | 9,615   | 2,496          | 0,260 |
| C5AR1         | complement C5a receptor 1                              | 57,689  | 14,145         | 0,245 |
| LILRB1        | leukocyte immunoglobulin like receptor B1              | 193,498 | 32,450         | 0,168 |
| LILRA1        | leukocyte immunoglobulin like receptor A1              | 426,657 | 67,396         | 0,158 |
| LILRA2        | leukocyte immunoglobulin like receptor A2              | 962,682 | 150,601        | 0,156 |



|        |                                           |         |        |       |
|--------|-------------------------------------------|---------|--------|-------|
| LILRB2 | leukocyte immunoglobulin like receptor B2 | 300,463 | 17,473 | 0,058 |
| LILRA5 | leukocyte immunoglobulin like receptor A5 | 21,633  | 0,000  | 0,000 |
| CD300C | CD300c molecule                           | 97,350  | 19,969 | 0,205 |
| CD180  | CD180 molecule                            | 463,914 | 69,060 | 0,149 |
| CFP    | complement factor properdin               | 348,537 | 34,946 | 0,100 |
| CD248  | CD248 molecule                            | 16,826  | 1,664  | 0,099 |
| CD36   | scavenger receptor (SR-B2)                | 525,209 | 45,763 | 0,087 |
| CD40   | CD40 molecule                             | 367,766 | 25,794 | 0,070 |
| CD52   | CD52 molecule                             | 56,487  | 2,496  | 0,044 |
| CD300A | CD300a molecule                           | 296,857 | 11,649 | 0,039 |
| FCGR2C | Fc fragment of IgG receptor IIc           | 54,083  | 1,664  | 0,031 |
| CD48   | CD48 molecule                             | 33,652  | 0,832  | 0,025 |
| FCGR2B | Fc fragment of IgG receptor IIb           | 43,267  | 0,832  | 0,019 |
| CD80   | CD80 molecule                             | 57,689  | 0,000  |       |
| CD86   | CD86 molecule                             | 27,643  | 0,000  |       |
| CD1C   | CD1c molecule                             | 27,643  | 0,000  |       |
| CD1A   | CD1a molecule                             | 8,413   | 0,000  |       |
| CD1B   | CD1b molecule                             | 3,606   | 0,000  |       |
| CD1E   | CD1e molecule                             | 3,606   | 0,000  |       |

S1G – Cell adhesion molecules

| BASELINE |                                               | control | $\Delta$ men19 | ratio  |
|----------|-----------------------------------------------|---------|----------------|--------|
| GPR126   | adhesion G protein-coupled receptor G6        | 2,223   | 28,792         | 12,952 |
| BAI3     | adhesion G protein-coupled receptor B3        | 5,557   | 59,383         | 10,686 |
| NCAM2    | neural cell adhesion molecule 2               | 5,557   | 59,383         | 10,686 |
| CEACAM19 | CEA cell adhesion molecule 19                 | 1,111   | 10,797         | 9,714  |
| AMIGO1   | adhesion molecule with Ig like domain 1       | 6,669   | 61,182         | 9,175  |
| GPR97    | adhesion G protein-coupled receptor G3        | 3,334   | 22,493         | 6,746  |
| BAI2     | adhesion G protein-coupled receptor B2        | 2,223   | 9,897          | 4,452  |
| NCAM1    | neural cell adhesion molecule 1               | 36,677  | 13,496         | 0,368  |
| ICAM5    | intercellular adhesion molecule 5             | 7,780   | 2,699          | 0,347  |
| ICAM2    | intercellular adhesion molecule 2             | 58,906  | 17,095         | 0,290  |
| PVRL1    | nectin cell adhesion molecule 1               | 45,569  | 12,596         | 0,276  |
| GPR133   | adhesion G protein-coupled receptor D1        | 14,449  | 3,599          | 0,249  |
| ICAM3    | intercellular adhesion molecule 3             | 103,364 | 23,393         | 0,226  |
| KIRREL   | kirre like nephrin family adhesion molecule 1 | 96,695  | 21,594         | 0,223  |
| CEACAM21 | CEA cell adhesion molecule 21                 | 28,897  | 6,298          | 0,218  |
| MCAM     | melanoma cell adhesion molecule (CD146)       | 18,894  | 3,599          | 0,190  |
| ICAM1    | intercellular adhesion molecule 1             | 81,135  | 12,596         | 0,155  |
| GPR124   | adhesion G protein-coupled receptor A2        | 262,299 | 37,789         | 0,144  |
| ITGB7    | integrin subunit beta 7                       | 58,906  | 8,098          | 0,137  |
| ESAM     | endothelial cell adhesion molecule            | 17,783  | 1,799          | 0,101  |
| ITGAM    | integrin subunit alpha M (CD11b)              | 294,531 | 11,697         | 0,040  |
| ICAM4    | intercellular adhesion molecule 4             | 13,337  | 0,000          | 0,000  |
| NEGR1    | neuronal growth regulator 1                   | 74,466  | 2,699          | 0,036  |



|         |                                              |          |        |        |
|---------|----------------------------------------------|----------|--------|--------|
| AMICA1  | junction adhesion molecule like              | 7,780    | 0,000  | 0,000  |
| LPS100  |                                              | control  | Δmen19 | ratio  |
| CDH2    | cadherin 2                                   | 0,000    | 3,328  |        |
| NCAM2   | neural cell adhesion molecule 2              | 1,202    | 49,091 | 40,846 |
| CIB3    | calcium and integrin binding family member 3 | 1,202    | 20,801 | 17,308 |
| AMIGO1  | adhesion molecule with Ig like domain 1      | 4,807    | 74,885 | 15,577 |
| BAI3    | adhesion G protein-coupled receptor B3       | 6,009    | 33,282 | 5,538  |
| GPR126  | adhesion G protein-coupled receptor G6       | 8,413    | 30,786 | 3,659  |
| MCAM    | melanoma cell adhesion molecule (CD146)      | 27,643   | 7,488  | 0,271  |
| ITGAL   | integrin subunit alpha L                     | 352,142  | 69,060 | 0,196  |
| ITGB7   | integrin subunit beta 7                      | 74,515   | 14,145 | 0,190  |
| L1CAM   | L1 cell adhesion molecule                    | 161,048  | 20,801 | 0,129  |
| GPR124  | adhesion G protein-coupled receptor A2       | 218,737  | 25,794 | 0,118  |
| NCAM1   | neural cell adhesion molecule 1              | 90,139   | 9,985  | 0,111  |
| VCAM1   | vascular cell adhesion molecule 1            | 42,065   | 4,160  | 0,099  |
| CADM1   | cell adhesion molecule 1                     | 8,413    | 0,832  | 0,099  |
| ITGAX   | integrin subunit alpha X (CD11c)             | 1028,784 | 92,358 | 0,090  |
| ICAM1   | intercellular adhesion molecule 1            | 618,953  | 54,083 | 0,087  |
| ITGA6   | integrin subunit alpha 6                     | 325,701  | 28,290 | 0,087  |
| EMR1    | adhesion G protein-coupled receptor E1       | 58,891   | 4,160  | 0,071  |
| ITGAM   | integrin subunit alpha M (CD11b)             | 835,286  | 33,282 | 0,040  |
| ITGA1   | integrin subunit alpha 1                     | 58,891   | 1,664  | 0,028  |
| ICAM4   | intercellular adhesion molecule 4            | 7,211    | 0,000  |        |
| CEACAM1 | CEA cell adhesion molecule 1                 | 6,009    | 0,000  |        |
| ESAM    | endothelial cell adhesion molecule           | 6,009    | 0,000  |        |
| EMR3    | adhesion G protein-coupled receptor E3       | 4,807    | 0,000  |        |
| CEACAM3 | CEA cell adhesion molecule 3                 | 3,606    | 0,000  |        |

#### S1H – Growth and angiogenic factor systems

|                 |                                                                            |         |         |        |
|-----------------|----------------------------------------------------------------------------|---------|---------|--------|
| <b>BASELINE</b> |                                                                            | control | Δmen19  | ratio  |
| GREB1           | growth regulating estrogen receptor binding 1                              | 0,000   | 26,092  |        |
| LTBP1           | latent transforming growth factor beta binding protein 1                   | 0,000   | 9,897   |        |
| GADD45G         | growth arrest and DNA damage inducible gamma                               | 0,000   | 5,398   |        |
| GDF9            | growth differentiation factor 9                                            | 1,111   | 13,496  |        |
| GDF6            | growth differentiation factor 6                                            | 2,223   | 23,393  |        |
| FGF9            | fibroblast growth factor 9                                                 | 2,223   | 21,594  | 12,143 |
| IGFBPL1         | insulin like growth factor binding protein like 1                          | 2,223   | 16,195  | 10,524 |
| GDF15           | growth differentiation factor 15                                           | 2,223   | 16,195  | 9,714  |
| LTBP2           | latent transforming growth factor beta binding protein 2                   | 2,223   | 11,697  | 7,286  |
| TGFB2           | transforming growth factor beta 2                                          | 188,944 | 634,313 | 7,286  |
| CSF1            | colony stimulating factor 1 = macrophage colony stimulating factor (M-CSF) | 2,223   | 13,496  | 6,060  |
| TGFB3L          | transforming growth factor beta receptor 3 like                            | 16,672  | 47,686  | 5,262  |
| VEGFA           | vascular endothelial growth factor A                                       | 17,783  | 6,298   | 3,357  |

|         |                                                          |          |         |       |
|---------|----------------------------------------------------------|----------|---------|-------|
| LTBP3   | latent transforming growth factor beta binding protein 3 | 157,824  | 51,285  | 2,860 |
| FGFR3   | fibroblast growth factor receptor 3                      | 40,012   | 11,697  | 0,354 |
| FGFR1   | fibroblast growth factor receptor 1                      | 1571,573 | 364,393 | 0,325 |
| GAS2L1  | growth arrest specific 2 like 1                          | 8,892    | 1,799   | 0,292 |
| IGF2BP1 | insulin like growth factor 2 mRNA binding protein 1      | 74,466   | 2,699   | 0,232 |
| GRTP1   | growth hormone regulated TBC protein 1                   | 14,449   | 0,000   | 0,202 |
| CSF1R   | CSF1 receptor                                            | 704,652  | 98,071  | 0,139 |
| TGFA    | transforming growth factor alpha                         | 6,669    | 0,000   | 0,067 |
| NEGR1   | neuronal growth regulator 1                              | 74,466   | 2,699   | 0,036 |
| PDGFD   | platelet derived growth factor D                         | 14,449   | 0,000   |       |
| PGF     | placental growth factor                                  | 6,669    | 0,000   |       |

|         |                                                          |          |          |       |
|---------|----------------------------------------------------------|----------|----------|-------|
| LPS100  |                                                          | control  | Δmen19   |       |
| TGFB2   | transforming growth factor beta 2                        | 0,000    | 41,603   |       |
| LTBP1   | latent transforming growth factor beta binding protein 1 | 0,000    | 7,488    |       |
| IGFBP4  | insulin like growth factor binding protein 4             | 52,881   | 297,874  | 5,633 |
| TGFB3L  | transforming growth factor beta receptor 3 like          | 3,606    | 19,137   | 5,308 |
| IGFBPL1 | insulin like growth factor binding protein like 1        | 7,211    | 34,114   | 4,731 |
| PDGFC   | platelet derived growth factor C                         | 51,680   | 168,906  | 3,268 |
| GRB10   | growth factor receptor bound protein 10                  | 255,994  | 814,577  | 3,182 |
| VEGFA   | vascular endothelial growth factor A                     | 192,296  | 341,141  | 1,774 |
| GAS7    | growth arrest specific 7                                 | 4074,273 | 1399,509 | 0,343 |
| TGFB3   | transforming growth factor beta 3                        | 30,046   | 9,985    | 0,332 |
| TGFB1   | transforming growth factor beta induced                  | 694,670  | 219,661  | 0,316 |
| GDF9    | growth differentiation factor 9                          | 6,009    | 1,664    | 0,277 |
| IGF2BP1 | insulin like growth factor 2 mRNA binding protein 1      | 2573,162 | 546,657  | 0,212 |
| CSF1R   | CSF1 receptor                                            | 1118,923 | 212,173  | 0,190 |
| GRTP1   | growth hormone regulated TBC protein 1                   | 13,220   | 2,496    | 0,189 |
| GAS1    | growth arrest specific 1                                 | 4,807    | 0,832    | 0,173 |
| ANGPTL6 | angiopoietin like 6                                      | 16,826   | 2,496    | 0,148 |
| FGF17   | fibroblast growth factor 17                              | 8,413    | 0,832    | 0,099 |
| IGF2    | insulin like growth factor 2                             | 55,285   | 4,160    | 0,075 |
| PDGFRL  | platelet derived growth factor receptor like             | 15,624   | 0,832    | 0,053 |
| NEGR1   | neuronal growth regulator 1                              | 222,342  | 9,153    | 0,041 |
| ANGPT1  | angiopoietin 1                                           | 8,413    | 0,000    | 0,000 |

#### S1I – Chemokines and chemokine receptors

|          |                                                 |         |         |        |
|----------|-------------------------------------------------|---------|---------|--------|
| BASELINE |                                                 | control | Δmen19  | ratio  |
| CCL20    | C-C motif chemokine ligand 20                   | 1,111   | 25,193  | 22,667 |
| CCR2     | C-C motif chemokine receptor 2                  | 434,572 | 160,153 | 0,369  |
| CXCR3    | C-X-C motif chemokine receptor 3                | 13,337  | 0,900   | 0,067  |
| CX3CR1   | C-X3-C motif chemokine receptor 1 = fractalkine | 843,581 | 13,496  | 0,016  |
| CCR7     | C-C motif chemokine receptor 7                  | 7,780   | 0,000   | 0,000  |

| LPS100 |                                                | control | $\Delta$ men19 | ratio |
|--------|------------------------------------------------|---------|----------------|-------|
| CXCR4  | C-X-C motif chemokine receptor 4               | 242,774 | 865,332        | 3,564 |
| CXCL14 | C-X-C motif chemokine ligand 14                | 1,202   | 4,160          | 3,462 |
| IL8    | C-X-C motif chemokine ligand 8                 | 9,615   | 30,786         | 3,202 |
| CCL20  | C-C motif chemokine ligand 20                  | 4,807   | 14,977         | 3,115 |
| CCR2   | C-C motif chemokine receptor 2                 | 189,892 | 559,138        | 2,944 |
| CXCL10 | C-X-C motif chemokine ligand 10                | 75,717  | 14,977         | 0,198 |
| CXCL11 | C-X-C motif chemokine ligand 11                | 4,807   | 0,832          | 0,173 |
| CXCL13 | C-X-C motif chemokine ligand 13                | 44,468  | 4,992          | 0,112 |
| CX3CR1 | C-X3-C motif chemokine receptor 1= fractalkine | 735,532 | 81,541         | 0,111 |
| CCR7   | C-C motif chemokine receptor 7                 | 73,313  | 1,664          | 0,023 |
| CXCR3  | C-X-C motif chemokine receptor 3               | 38,459  | 0,832          | 0,022 |
| CXCL16 | C-X-C motif chemokine ligand 16                | 13,220  | 0,000          |       |
| ACKR3  | atypical chemokine receptor 3                  | 7,211   | 0,000          |       |
| CCR9   | C-C motif chemokine receptor 9                 | 6,009   | 0,000          |       |
| CCR10  | C-C motif chemokine receptor 10                | 6,009   | 0,000          |       |

### **Supplemental Table S2**

RNA-seq FPKM data for  $\Delta$ mascRNA monocytes

#### **S2A - Innate immune sensors**

| BASELINE |                                                                  | control | $\Delta$ mascA4 | ratio |
|----------|------------------------------------------------------------------|---------|-----------------|-------|
| IFITM10  | interferon induced transmembrane protein 10                      | 2,121   | 18,385          | 8,667 |
| IFITM3   | interferon induced transmembrane protein 3                       | 27,577  | 156,978         | 5,692 |
| IFITM1   | interferon induced transmembrane protein 1                       | 9,899   | 45,255          | 4,571 |
| CIITA    | class II major histocompatibility complex transactivator         | 42,426  | 182,434         | 4,300 |
| NAIP     | NLR family apoptosis inhibitory protein                          | 42,426  | 148,492         | 3,500 |
| KIAA1324 | endosome-lysosome associated apoptosis and autophagy regulator 1 | 1,414   | 4,243           | 3,000 |
| IFRD2    | interferon related developmental regulator 2                     | 955,301 | 308,299         | 0,323 |
| AEN      | apoptosis enhancing nuclease                                     | 661,852 | 178,191         | 0,269 |
| PERP     | p53 apoptosis effector related to PMP22                          | 164,756 | 32,527          | 0,197 |

#### **S2B – Transcription and nuclear factors, epigenetic modifiers**

| BASELINE |                                                           | control | $\Delta$ mascA4 | ratio  |
|----------|-----------------------------------------------------------|---------|-----------------|--------|
| SP5      | Sp5 transcription factor                                  | 1,414   | 28,284          | 20,000 |
| TP53INP1 | tumor protein p53 inducible nuclear protein 1             | 22,627  | 302,642         | 13,375 |
| SIM1     | SIM bHLH transcription factor 1                           | 3,536   | 45,255          | 12,800 |
| NPIB9    | nuclear pore complex interacting protein family member B9 | 0,707   | 8,485           | 12,000 |
| ETV1     | ETS variant transcription factor 1                        | 21,920  | 165,463         | 7,548  |
| ELF3     | E74 like ETS transcription factor 3                       | 0,707   | 4,243           | 6,000  |
| HDAC11   | histone deacetylase 11                                    | 1,414   | 8,485           | 6,000  |
| CHD5     | chromodomain helicase DNA binding protein 5               | 6,364   | 36,770          | 5,778  |

|         |                                       |         |          |       |
|---------|---------------------------------------|---------|----------|-------|
| METTL7A | methyltransferase like 7A             | 53,033  | 206,475  | 3,893 |
| NFATC4  | nuclear factor of activated T cells 4 | 67,882  | 260,215  | 3,833 |
| DNASE1  | deoxyribonuclease 1                   | 436,285 | 1159,655 | 2,658 |
| CCPG1   | cell cycle progression 1              | 86,974  | 181,019  | 2,081 |
| ETV4    | ETS variant transcription factor 4    | 77,075  | 9,899    | 0,128 |

#### S2C – Translation and ribosomal factors, nucleic acid modifiers

| BASELINE |                                                                    | control | $\Delta$ masCA4 | ratio |
|----------|--------------------------------------------------------------------|---------|-----------------|-------|
| RNASE6   | ribonuclease A family member k6                                    | 18,385  | 57,983          | 3,154 |
| DNASE1   | deoxyribonuclease 1                                                | 436,285 | 1159,655        | 2,658 |
| MRPS26   | mitochondrial ribosomal protein S26                                | 262,337 | 82,024          | 0,313 |
| MRPS12   | mitochondrial ribosomal protein S12                                | 458,205 | 132,936         | 0,290 |
| RRP9     | ribosomal RNA processing 9, U3 small nucleolar RNA binding protein | 498,510 | 123,037         | 0,247 |
| NT5C1A   | 5'-nucleotidase, cytosolic 1A                                      | 13,435  | 1,414           | 0,105 |

#### S2D - Long noncoding RNAs, antisense transcripts, microRNAs

| BASELINE      |                                                                             | control  | $\Delta$ masCA4 | ratio |
|---------------|-----------------------------------------------------------------------------|----------|-----------------|-------|
| RP11-443A13.5 | KCNMA1 antisense RNA 1                                                      | 0,000    | 24,042          |       |
| AC078883.3    | ITGA6 antisense RNA 1                                                       | 0,000    | 12,728          |       |
| RP11-496I9.1  | LMNTD2 antisense RNA 1                                                      | 0,000    | 12,728          |       |
| RP1-249H1.4   | MARCKS cis regulating lncRNA promoter of cytokines and inflammation (ROCKI) | 294,156  | 934,795         | 3,178 |
| MIR3648       | microRNA 3648-2                                                             | 3661,399 | 574,171         | 0,157 |
| MIRLET7D      | microRNA let-7d                                                             | 12,728   | 1,414           | 0,111 |
| CELF2-AS1     | CELF2 antisense RNA 1                                                       | 14,142   | 1,414           | 0,100 |

#### S2E – Interleukins and TNF systems, interferon-induced genes

| BASELINE |                                                            | control | $\Delta$ masCA4 | ratio |
|----------|------------------------------------------------------------|---------|-----------------|-------|
| ADAMTS4  | ADAM metalloproteinase with thrombospondin type 1 motif 4  | 4,243   | 26,870          | 6,333 |
| SLFN5    | schlafen family member 5                                   | 38,184  | 162,635         | 4,259 |
| IL17C    | interleukin 17C                                            | 0,707   | 2,828           | 4,000 |
| IL1B     | interleukin 1 beta                                         | 2,121   | 8,485           | 4,000 |
| IL10RA   | interleukin 10 receptor subunit alpha                      | 32,527  | 100,409         | 3,087 |
| ADAMTS10 | ADAM metalloproteinase with thrombospondin type 1 motif 10 | 76,368  | 224,860         | 2,944 |
| ADAM33   | ADAM metalloproteinase domain 33                           | 2,121   | 5,657           | 2,667 |
| ADAMTS6  | ADAM metalloproteinase with thrombospondin type 1 motif 6  | 17,678  | 46,669          | 2,640 |
| IL8      | C-X-C motif chemokine ligand 8                             | 2,121   | 4,243           | 2,000 |
| TRAF5    | TNF receptor associated factor 5                           | 33,234  | 5,657           | 0,170 |
| IL12A    | interleukin 12A                                            | 15,556  | 1,414           | 0,091 |

#### S2F – Cluster of differentiation and other leukocyte markers

| BASELINE |                                 | control | $\Delta$ masCA4 | ratio  |
|----------|---------------------------------|---------|-----------------|--------|
| FCGR2C   | Fc fragment of IgG receptor IIc | 7,778   | 288,500         | 37,091 |

|        |                                           |         |         |        |
|--------|-------------------------------------------|---------|---------|--------|
| FCGR2B | Fc fragment of IgG receptor IIb           | 7,071   | 207,889 | 29,400 |
| LSP1   | lymphocyte specific protein 1             | 12,728  | 309,713 | 24,333 |
| C1R    | complement C1r                            | 0,707   | 12,728  | 18,000 |
| C5AR2  | complement component 5a receptor 2        | 1,414   | 18,385  | 13,000 |
| LAX1   | lymphocyte transmembrane adaptor 1        | 1,414   | 9,899   | 7,000  |
| CFP    | complement factor properdin               | 71,418  | 434,164 | 6,079  |
| LILRA5 | leukocyte immunoglobulin like receptor A5 | 1,414   | 5,657   | 4,000  |
| LILRA4 | leukocyte immunoglobulin like receptor A4 | 0,707   | 2,828   | 4,000  |
| MST1   | macrophage stimulating 1                  | 34,648  | 138,593 | 4,000  |
| C5AR1  | complement C5a receptor 1                 | 14,142  | 55,154  | 3,900  |
| LILRB3 | leukocyte immunoglobulin like receptor B3 | 2,121   | 7,071   | 3,333  |
| LILRA6 | leukocyte immunoglobulin like receptor A6 | 1,414   | 4,243   | 3,000  |
| MPEG1  | macrophage expressed 1                    | 14,849  | 43,841  | 2,952  |
| CD93   | CD93 molecule                             | 824,487 | 2,828   | 0,003  |

#### S2G – Cell adhesion molecules

| BASELINE |                                               | control | $\Delta$ masA4 | ratio  |
|----------|-----------------------------------------------|---------|----------------|--------|
| JAM2     | junctional adhesion molecule 2                | 0,000   | 15,556         |        |
| NCKAP1   | NCK associated protein 1                      | 0,707   | 9,899          | 14,000 |
| CEACAM1  | CEA cell adhesion molecule 1                  | 0,707   | 8,485          | 12,000 |
| KIRREL3  | kirre like nephrin family adhesion molecule 3 | 0,707   | 7,071          | 10,000 |
| CEACAM6  | CEA cell adhesion molecule 6                  | 103,945 | 840,043        | 8,082  |
| AMICA1   | junction adhesion molecule like               | 3,536   | 21,213         | 6,000  |
| CEACAM4  | CEA cell adhesion molecule 4                  | 12,021  | 59,397         | 4,941  |
| ITGAM    | integrin subunit alpha M                      | 298,399 | 1364,716       | 4,573  |
| CEACAM19 | CEA cell adhesion molecule 19                 | 4,243   | 18,385         | 4,333  |
| PCDH11X  | protocadherin 11 X-linked                     | 4,950   | 19,799         | 4,000  |
| CDHR4    | cadherin related family member 4              | 0,707   | 2,828          | 4,000  |
| SMAGP    | small cell adhesion glycoprotein              | 41,719  | 161,220        | 3,864  |
| ITGA9    | integrin subunit alpha 9                      | 25,456  | 89,095         | 3,500  |
| ITGAX    | integrin subunit alpha X                      | 328,805 | 1093,187       | 3,325  |
| ICAM1    | intercellular adhesion molecule 1             | 57,983  | 190,919        | 3,293  |
| ICAM4    | intercellular adhesion molecule 4             | 16,263  | 49,497         | 3,043  |
| PCDHB9   | protocadherin beta 9                          | 4,950   | 14,142         | 2,857  |
| CDH23    | cadherin related 23                           | 45,962  | 130,108        | 2,831  |
| KIAA1462 | junctional cadherin 5 associated              | 502,046 | 155,563        | 0,310  |
| PCDH17   | protocadherin 17                              | 118,794 | 5,657          | 0,048  |

#### S2H – Growth and angiogenic factor systems

| BASELINE |                                                                | control | $\Delta$ masA4 | ratio |
|----------|----------------------------------------------------------------|---------|----------------|-------|
| ANGPT4   | angiopoietin 4                                                 | 0,000   | 5,657          |       |
| ANGPT1   | angiopoietin 1                                                 | 0,000   | 5,657          |       |
| IGFALS   | insulin like growth factor binding protein acid labile subunit | 0,000   | 5,657          |       |

|         |                                                                            |         |          |        |
|---------|----------------------------------------------------------------------------|---------|----------|--------|
| ANG     | angiogenin                                                                 | 0,707   | 8,485    | 12,000 |
| LTBP2   | latent transforming growth factor beta binding protein 2                   | 2,121   | 18,385   | 8,667  |
| GDF7    | growth differentiation factor 7                                            | 1,414   | 11,314   | 8,000  |
| TGFA    | transforming growth factor alpha                                           | 3,536   | 28,284   | 8,000  |
| FGF11   | fibroblast growth factor 11                                                | 4,243   | 32,527   | 7,667  |
| ANGPTL4 | angiopoietin like 4                                                        | 1,414   | 8,485    | 6,000  |
| FGF17   | fibroblast growth factor 17                                                | 2,828   | 15,556   | 5,500  |
| GDF5    | growth differentiation factor 5                                            | 0,707   | 2,828    | 4,000  |
| NGFR    | nerve growth factor receptor                                               | 2,828   | 8,485    | 3,000  |
| GADD45G | growth arrest and DNA damage inducible gamma                               | 1,414   | 4,243    | 3,000  |
| VEGFA   | vascular endothelial growth factor A                                       | 456,084 | 1294,005 | 2,837  |
| TGFB1   | transforming growth factor beta induced                                    | 717,006 | 2022,325 | 2,821  |
| CSF1    | colony stimulating factor 1 = macrophage colony-stimulating factor (M-CSF) | 4,950   | 1,414    | 0,286  |

S2I – Chemokines and chemokine receptors

| BASELINE |                                 | control | $\Delta$ mascA4 | ratio |
|----------|---------------------------------|---------|-----------------|-------|
| CXCL16   | C-X-C motif chemokine ligand 16 | 1,414   | 11,314          | 8,000 |
| CCL22    | C-C motif chemokine ligand 22   | 4,950   | 22,627          | 4,571 |
| ACKR2    | atypical chemokine receptor 2   | 6,364   | 28,284          | 4,444 |
| CCL24    | C-C motif chemokine ligand 24   | 4,243   | 18,385          | 4,333 |
| CCR10    | C-C motif chemokine receptor 10 | 0,707   | 2,828           | 4,000 |
| CRLF1    | cytokine receptor like factor 1 | 2,828   | 11,314          | 4,000 |
| CRLF2    | cytokine receptor like factor 2 | 1,414   | 5,657           | 4,000 |

### Supplemental Table S3

Genes in the KEGG pathways displayed in Figure 2C

#### S3A - Chemokines and chemokine receptors

[https://www.gsea-msigdb.org/gsea/msigdb/human/geneset/KEGG\\_CHEMOKINE\\_SIGNALING\\_PATHWAY.html](https://www.gsea-msigdb.org/gsea/msigdb/human/geneset/KEGG_CHEMOKINE_SIGNALING_PATHWAY.html) (189 genes)

| NCBI (Entrez)<br>Gene Id | Gene<br>Symbol | Gene Description                               |
|--------------------------|----------------|------------------------------------------------|
| 10000                    | AKT3           | AKT serine/threonine kinase 3 [Source:HGNC ... |
| 10235                    | RASGRP2        | RAS guanyl releasing protein 2 [Source:HGNC... |
| 10344                    | CCL26          | C-C motif chemokine ligand 26 [Source:HGNC ... |
| 10451                    | VAV3           | vav guanine nucleotide exchange factor 3 [S... |
| 10563                    | CXCL13         | C-X-C motif chemokine ligand 13 [Source:HGN... |
| 10663                    | CXCR6          | C-X-C motif chemokine receptor 6 [Source:HG... |
| 10681                    | GNB5           | G protein subunit beta 5 [Source:HGNC Symbo... |
| 107                      | ADCY1          | adenylate cyclase 1 [Source:HGNC Symbol;Acc... |
| 108                      | ADCY2          | adenylate cyclase 2 [Source:HGNC Symbol;Acc... |
| 10803                    | CCR9           | C-C motif chemokine receptor 9 [Source:HGNC... |
| 10850                    | CCL27          | C-C motif chemokine ligand 27 [Source:HGNC ... |
| 109                      | ADCY3          | adenylate cyclase 3 [Source:HGNC Symbol;Acc... |
| 111                      | ADCY5          | adenylate cyclase 5 [Source:HGNC Symbol;Acc... |
| 112                      | ADCY6          | adenylate cyclase 6 [Source:HGNC Symbol;Acc... |
| 113                      | ADCY7          | adenylate cyclase 7 [Source:HGNC Symbol;Acc... |
| 114                      | ADCY8          | adenylate cyclase 8 [Source:HGNC Symbol;Acc... |
| 1147                     | CHUK           | component of inhibitor of nuclear factor ka... |
| 115                      | ADCY9          | adenylate cyclase 9 [Source:HGNC Symbol;Acc... |
| 1230                     | CCR1           | C-C motif chemokine receptor 1 [Source:HGNC... |
| 1232                     | CCR3           | C-C motif chemokine receptor 3 [Source:HGNC... |
| 1233                     | CCR4           | C-C motif chemokine receptor 4 [Source:HGNC... |
| 1234                     | CCR5           | C-C motif chemokine receptor 5 [Source:HGNC... |
| 1235                     | CCR6           | C-C motif chemokine receptor 6 [Source:HGNC... |
| 1236                     | CCR7           | C-C motif chemokine receptor 7 [Source:HGNC... |
| 1237                     | CCR8           | C-C motif chemokine receptor 8 [Source:HGNC... |
| 131890                   | GRK7           | G protein-coupled receptor kinase 7 [Source... |
| 1398                     | CRK            | CRK proto-oncogene, adaptor protein [Source... |
| 1399                     | CRKL           | CRK like proto-oncogene, adaptor protein [S... |
| 1445                     | CSK            | C-terminal Src kinase [Source:HGNC Symbol;A... |
| 1524                     | CX3CR1         | C-X3-C motif chemokine receptor 1 [Source:H... |
| 156                      | GRK2           | G protein-coupled receptor kinase 2 [Source... |
| 157                      | GRK3           | G protein-coupled receptor kinase 3 [Source... |
| 1794                     | DOCK2          | dedicator of cytokinesis 2 [Source:HGNC Sym... |
| 196883                   | ADCY4          | adenylate cyclase 4 [Source:HGNC Symbol;Acc... |
| 207                      | AKT1           | AKT serine/threonine kinase 1 [Source:HGNC ... |
| 208                      | AKT2           | AKT serine/threonine kinase 2 [Source:HGNC ... |
| 2185                     | PTK2B          | protein tyrosine kinase 2 beta [Source:HGNC... |
| 2268                     | FGR            | FGR proto-oncogene, Src family tyrosine kin... |
| 2309                     | FOXO3          | forkhead box O3 [Source:HGNC Symbol;Acc:HGN... |

|        |        |                                                |
|--------|--------|------------------------------------------------|
| 23236  | PLCB1  | phospholipase C beta 1 [Source:HGNC Symbol;... |
| 23533  | PIK3R5 | phosphoinositide-3-kinase regulatory subuni... |
| 25759  | SHC2   | SHC adaptor protein 2 [Source:HGNC Symbol;A... |
| 26230  | TIAM2  | TIAM Rac1 associated GEF 2 [Source:HGNC Sym... |
| 2770   | GNAI1  | G protein subunit alpha i1 [Source:HGNC Sym... |
| 2771   | GNAI2  | G protein subunit alpha i2 [Source:HGNC Sym... |
| 2773   | GNAI3  | G protein subunit alpha i3 [Source:HGNC Sym... |
| 2782   | GNB1   | G protein subunit beta 1 [Source:HGNC Symbo... |
| 2783   | GNB2   | G protein subunit beta 2 [Source:HGNC Symbo... |
| 2784   | GNB3   | G protein subunit beta 3 [Source:HGNC Symbo... |
| 2785   | GNG3   | G protein subunit gamma 3 [Source:HGNC Symb... |
| 2786   | GNG4   | G protein subunit gamma 4 [Source:HGNC Symb... |
| 2787   | GNG5   | G protein subunit gamma 5 [Source:HGNC Symb... |
| 2788   | GNG7   | G protein subunit gamma 7 [Source:HGNC Symb... |
| 2790   | GNG10  | G protein subunit gamma 10 [Source:HGNC Sym... |
| 2791   | GNG11  | G protein subunit gamma 11 [Source:HGNC Sym... |
| 2792   | GNGT1  | G protein subunit gamma transducin 1 [Sourc... |
| 2793   | GNGT2  | G protein subunit gamma transducin 2 [Sourc... |
| 2826   | CCR10  | C-C motif chemokine receptor 10 [Source:HGN... |
| 2829   | XCR1   | X-C motif chemokine receptor 1 [Source:HGNC... |
| 2833   | CXCR3  | C-X-C motif chemokine receptor 3 [Source:HG... |
| 2868   | GRK4   | G protein-coupled receptor kinase 4 [Source... |
| 2869   | GRK5   | G protein-coupled receptor kinase 5 [Source... |
| 2870   | GRK6   | G protein-coupled receptor kinase 6 [Source... |
| 2885   | GRB2   | growth factor receptor bound protein 2 [Sou... |
| 2919   | CXCL1  | C-X-C motif chemokine ligand 1 [Source:HGNC... |
| 2920   | CXCL2  | C-X-C motif chemokine ligand 2 [Source:HGNC... |
| 2921   | CXCL3  | C-X-C motif chemokine ligand 3 [Source:HGNC... |
| 2931   | GSK3A  | glycogen synthase kinase 3 alpha [Source:HG... |
| 2932   | GSK3B  | glycogen synthase kinase 3 beta [Source:HGN... |
| 3055   | HCK    | HCK proto-oncogene, Src family tyrosine kin... |
| 3265   | HRAS   | HRas proto-oncogene, GTPase [Source:HGNC Sy... |
| 3551   | IKBKB  | inhibitor of nuclear factor kappa B kinase ... |
| 3576   | CXCL8  | C-X-C motif chemokine ligand 8 [Source:HGNC... |
| 3577   | CXCR1  | C-X-C motif chemokine receptor 1 [Source:HG... |
| 3579   | CXCR2  | C-X-C motif chemokine receptor 2 [Source:HG... |
| 3627   | CXCL10 | C-X-C motif chemokine ligand 10 [Source:HGN... |
| 3702   | ITK    | IL2 inducible T cell kinase [Source:HGNC Sy... |
| 3717   | JAK2   | Janus kinase 2 [Source:HGNC Symbol;Acc:HGNC... |
| 3718   | JAK3   | Janus kinase 3 [Source:HGNC Symbol;Acc:HGNC... |
| 3845   | KRAS   | KRAS proto-oncogene, GTPase [Source:HGNC Sy... |
| 387    | RHOA   | ras homolog family member A [Source:HGNC Sy... |
| 399694 | SHC4   | SHC adaptor protein 4 [Source:HGNC Symbol;A... |
| 4067   | LYN    | LYN proto-oncogene, Src family tyrosine kin... |
| 408    | ARRB1  | arrestin beta 1 [Source:HGNC Symbol;Acc:HGN... |
| 409    | ARRB2  | arrestin beta 2 [Source:HGNC Symbol;Acc:HGN... |



|        |        |                                                     |
|--------|--------|-----------------------------------------------------|
| 414062 | CCL3L3 | C-C motif chemokine ligand 3 like 3 [Source:HGNC... |
| 4283   | CXCL9  | C-X-C motif chemokine ligand 9 [Source:HGNC...      |
| 4790   | NFKB1  | nuclear factor kappa B subunit 1 [Source:HGNC...    |
| 4792   | NFKBIA | NFKB inhibitor alpha [Source:HGNC Symbol;Acc...     |
| 4793   | NFKBIB | NFKB inhibitor beta [Source:HGNC Symbol;Acc...      |
| 4893   | NRAS   | NRAS proto-oncogene, GTPase [Source:HGNC Sy...      |
| 5058   | PAK1   | p21 (RAC1) activated kinase 1 [Source:HGNC ...      |
| 51764  | GNG13  | G protein subunit gamma 13 [Source:HGNC Sym...      |
| 5196   | PF4    | platelet factor 4 [Source:HGNC Symbol;Acc:H...      |
| 5197   | PF4V1  | platelet factor 4 variant 1 [Source:HGNC Sy...      |
| 5290   | PIK3CA | phosphatidylinositol-4,5-bisphosphate 3-kin...      |
| 5291   | PIK3CB | phosphatidylinositol-4,5-bisphosphate 3-kin...      |
| 5293   | PIK3CD | phosphatidylinositol-4,5-bisphosphate 3-kin...      |
| 5294   | PIK3CG | phosphatidylinositol-4,5-bisphosphate 3-kin...      |
| 5295   | PIK3R1 | phosphoinositide-3-kinase regulatory subuni...      |
| 5296   | PIK3R2 | phosphoinositide-3-kinase regulatory subuni...      |
| 5330   | PLCB2  | phospholipase C beta 2 [Source:HGNC Symbol;...      |
| 5331   | PLCB3  | phospholipase C beta 3 [Source:HGNC Symbol;...      |
| 5332   | PLCB4  | phospholipase C beta 4 [Source:HGNC Symbol;...      |
| 53358  | SHC3   | SHC adaptor protein 3 [Source:HGNC Symbol;A...      |
| 54331  | GNG2   | G protein subunit gamma 2 [Source:HGNC Symb...      |
| 5473   | PPBP   | pro-platelet basic protein [Source:HGNC Sym...      |
| 5566   | PRKACA | protein kinase cAMP-activated catalytic sub...      |
| 5567   | PRKACB | protein kinase cAMP-activated catalytic sub...      |
| 5568   | PRKACG | protein kinase cAMP-activated catalytic sub...      |
| 5579   | PRKCB  | protein kinase C beta [Source:HGNC Symbol;A...      |
| 5580   | PRKCD  | protein kinase C delta [Source:HGNC Symbol;...      |
| 5590   | PRKCZ  | protein kinase C zeta [Source:HGNC Symbol;A...      |
| 5594   | MAPK1  | mitogen-activated protein kinase 1 [Source:...      |
| 5595   | MAPK3  | mitogen-activated protein kinase 3 [Source:...      |
| 55970  | GNG12  | G protein subunit gamma 12 [Source:HGNC Sym...      |
| 5604   | MAP2K1 | mitogen-activated protein kinase kinase 1 [...      |
| 5613   | PRKX   | protein kinase X-linked [Source:HGNC Symbol...      |
| 56288  | PARD3  | par-3 family cell polarity regulator [Sourc...      |
| 56477  | CCL28  | C-C motif chemokine ligand 28 [Source:HGNC ...      |
| 5747   | PTK2   | protein tyrosine kinase 2 [Source:HGNC Symb...      |
| 57580  | PREX1  | phosphatidylinositol-3,4,5-trisphosphate de...      |
| 58191  | CXCL16 | C-X-C motif chemokine ligand 16 [Source:HGN...      |
| 5829   | PXN    | paxillin [Source:HGNC Symbol;Acc:HGNC:9718]         |
| 5879   | RAC1   | Rac family small GTPase 1 [Source:HGNC Symb...      |
| 5880   | RAC2   | Rac family small GTPase 2 [Source:HGNC Symb...      |
| 5894   | RAF1   | Raf-1 proto-oncogene, serine/threonine kina...      |
| 5906   | RAP1A  | RAP1A, member of RAS oncogene family [Sourc...      |
| 5908   | RAP1B  | RAP1B, member of RAS oncogene family [Sourc...      |
| 59345  | GNB4   | G protein subunit beta 4 [Source:HGNC Symbo...      |
| 5970   | RELA   | RELA proto-oncogene, NF-kB subunit [Source:...      |

|        |        |                                                |
|--------|--------|------------------------------------------------|
| 6011   | GRK1   | G protein-coupled receptor kinase 1 [Source... |
| 6093   | ROCK1  | Rho associated coiled-coil containing prote... |
| 6346   | CCL1   | C-C motif chemokine ligand 1 [Source:HGNC S... |
| 6347   | CCL2   | C-C motif chemokine ligand 2 [Source:HGNC S... |
| 6348   | CCL3   | C-C motif chemokine ligand 3 [Source:HGNC S... |
| 6349   | CCL3L1 | C-C motif chemokine ligand 3 like 1 [Source... |
| 6351   | CCL4   | C-C motif chemokine ligand 4 [Source:HGNC S... |
| 6352   | CCL5   | C-C motif chemokine ligand 5 [Source:HGNC S... |
| 6354   | CCL7   | C-C motif chemokine ligand 7 [Source:HGNC S... |
| 6355   | CCL8   | C-C motif chemokine ligand 8 [Source:HGNC S... |
| 6356   | CCL11  | C-C motif chemokine ligand 11 [Source:HGNC ... |
| 6357   | CCL13  | C-C motif chemokine ligand 13 [Source:HGNC ... |
| 6358   | CCL14  | C-C motif chemokine ligand 14 [Source:HGNC ... |
| 6359   | CCL15  | C-C motif chemokine ligand 15 [Source:HGNC ... |
| 6360   | CCL16  | C-C motif chemokine ligand 16 [Source:HGNC ... |
| 6361   | CCL17  | C-C motif chemokine ligand 17 [Source:HGNC ... |
| 6362   | CCL18  | C-C motif chemokine ligand 18 [Source:HGNC ... |
| 6363   | CCL19  | C-C motif chemokine ligand 19 [Source:HGNC ... |
| 6364   | CCL20  | C-C motif chemokine ligand 20 [Source:HGNC ... |
| 6366   | CCL21  | C-C motif chemokine ligand 21 [Source:HGNC ... |
| 6367   | CCL22  | C-C motif chemokine ligand 22 [Source:HGNC ... |
| 6368   | CCL23  | C-C motif chemokine ligand 23 [Source:HGNC ... |
| 6369   | CCL24  | C-C motif chemokine ligand 24 [Source:HGNC ... |
| 6370   | CCL25  | C-C motif chemokine ligand 25 [Source:HGNC ... |
| 6372   | CXCL6  | C-X-C motif chemokine ligand 6 [Source:HGNC... |
| 6373   | CXCL11 | C-X-C motif chemokine ligand 11 [Source:HGN... |
| 6374   | CXCL5  | C-X-C motif chemokine ligand 5 [Source:HGNC... |
| 6375   | XCL1   | X-C motif chemokine ligand 1 [Source:HGNC S... |
| 6376   | CX3CL1 | C-X3-C motif chemokine ligand 1 [Source:HGN... |
| 6387   | CXCL12 | C-X-C motif chemokine ligand 12 [Source:HGN... |
| 643    | CXCR5  | C-X-C motif chemokine receptor 5 [Source:HG... |
| 6464   | SHC1   | SHC adaptor protein 1 [Source:HGNC Symbol;A... |
| 653361 | NCF1   | neutrophil cytosolic factor 1 [Source:HGNC ... |
| 6654   | SOS1   | SOS Ras/Rac guanine nucleotide exchange fac... |
| 6655   | SOS2   | SOS Ras/Rho guanine nucleotide exchange fac... |
| 673    | BRAF   | B-Raf proto-oncogene, serine/threonine kina... |
| 6772   | STAT1  | signal transducer and activator of transcri... |
| 6773   | STAT2  | signal transducer and activator of transcri... |
| 6774   | STAT3  | signal transducer and activator of transcri... |
| 6777   | STAT5B | signal transducer and activator of transcri... |
| 6846   | XCL2   | X-C motif chemokine ligand 2 [Source:HGNC S... |
| 7074   | TIAM1  | TIAM Rac1 associated GEF 1 [Source:HGNC Sym... |
| 728045 | PPBPP1 | pro-platelet basic protein pseudogene 1 [So... |
| 729230 | CCR2   | C-C motif chemokine receptor 2 [Source:HGNC... |
| 7409   | VAV1   | vav guanine nucleotide exchange factor 1 [S... |
| 7410   | VAV2   | vav guanine nucleotide exchange factor 2 [S... |

|       |        |                                                |
|-------|--------|------------------------------------------------|
| 7454  | WAS    | WASP actin nucleation promoting factor [Sou... |
| 7852  | CXCR4  | C-X-C motif chemokine receptor 4 [Source:HG... |
| 8503  | PIK3R3 | phosphoinositide-3-kinase regulatory subuni... |
| 8517  | IKBKG  | inhibitor of nuclear factor kappa B kinase ... |
| 8976  | WASL   | WASP like actin nucleation promoting factor... |
| 94235 | GNG8   | G protein subunit gamma 8 [Source:HGNC Symb... |
| 9475  | ROCK2  | Rho associated coiled-coil containing prote... |
| 9547  | CXCL14 | C-X-C motif chemokine ligand 14 [Source:HGN... |
| 9560  | CCL4L2 | C-C motif chemokine ligand 4 like 2 [Source... |
| 9564  | BCAR1  | BCAR1 scaffold protein, Cas family member [... |
| 9844  | ELMO1  | engulfment and cell motility 1 [Source:HGNC... |
| 998   | CDC42  | cell division cycle 42 [Source:HGNC Symbol;... |

### S3B - Primary immunodeficiency

[https://www.gsea-msigdb.org/gsea/msigdb/human/geneset/KEGG\\_PRIMARY\\_IMMUNODEFICIENCY.html](https://www.gsea-msigdb.org/gsea/msigdb/human/geneset/KEGG_PRIMARY_IMMUNODEFICIENCY.html)  
(35 genes)

| NCBI (Entrez)<br>Gene Id | Gene<br>Symbol | Gene Description                             |
|--------------------------|----------------|----------------------------------------------|
| 100                      | ADA            | adenosine deaminase [Source:HGNC Symbol;A... |
| 115650                   | TNFRSF13C      | TNF receptor superfamily member 13C [Sour... |
| 23495                    | TNFRSF13B      | TNF receptor superfamily member 13B [Sour... |
| 29760                    | BLNK           | B cell linker [Source:HGNC Symbol;Acc:HGN... |
| 29851                    | ICOS           | inducible T cell costimulator [Source:HGN... |
| 326                      | AIRE           | autoimmune regulator [Source:HGNC Symbol;... |
| 3543                     | IGLL1          | immunoglobulin lambda like polypeptide 1 ... |
| 3561                     | IL2RG          | interleukin 2 receptor subunit gamma [Sou... |
| 3575                     | IL7R           | interleukin 7 receptor [Source:HGNC Symbo... |
| 3718                     | JAK3           | Janus kinase 3 [Source:HGNC Symbol;Acc:HG... |
| 3932                     | LCK            | LCK proto-oncogene, Src family tyrosine k... |
| 4261                     | CIITA          | class II major histocompatibility complex... |
| 57379                    | AICDA          | activation induced cytidine deaminase [So... |
| 5788                     | PTPRC          | protein tyrosine phosphatase receptor typ... |
| 5896                     | RAG1           | recombination activating 1 [Source:HGNC S... |
| 5897                     | RAG2           | recombination activating 2 [Source:HGNC S... |
| 5993                     | RFX5           | regulatory factor X5 [Source:HGNC Symbol;... |
| 5994                     | RFXAP          | regulatory factor X associated protein [S... |
| 64421                    | DCLRE1C        | DNA cross-link repair 1C [Source:HGNC Sym... |
| 6890                     | TAP1           | transporter 1, ATP binding cassette subfa... |
| 6891                     | TAP2           | transporter 2, ATP binding cassette subfa... |
| 695                      | BTK            | Bruton tyrosine kinase [Source:HGNC Symbo... |
| 7374                     | UNG            | uracil DNA glycosylase [Source:HGNC Symbo... |
| 7535                     | ZAP70          | zeta chain of T cell receptor associated ... |
| 8517                     | IKBKG          | inhibitor of nuclear factor kappa B kinas... |
| 8625                     | RFXANK         | regulatory factor X associated ankyrin co... |
| 915                      | CD3D           | CD3d molecule [Source:HGNC Symbol;Acc:HGN... |

|     |        |                                              |
|-----|--------|----------------------------------------------|
| 916 | CD3E   | CD3e molecule [Source:HGNC Symbol;Acc:HGN... |
| 920 | CD4    | CD4 molecule [Source:HGNC Symbol;Acc:HGNC... |
| 925 | CD8A   | CD8a molecule [Source:HGNC Symbol;Acc:HGN... |
| 926 | CD8B   | CD8b molecule [Source:HGNC Symbol;Acc:HGN... |
| 930 | CD19   | CD19 molecule [Source:HGNC Symbol;Acc:HGN... |
| 958 | CD40   | CD40 molecule [Source:HGNC Symbol;Acc:HGN... |
| 959 | CD40LG | CD40 ligand [Source:HGNC Symbol;Acc:HGNC:... |
| 973 | CD79A  | CD79a molecule [Source:HGNC Symbol;Acc:HG... |

### S3C - Cytokine-cytokine receptor interaction

<https://www.gsea->

[msigdb.org/gsea/msigdb/human/geneset/KEGG\\_CYTOKINE\\_CYTOKINE\\_RECEPTOR\\_INTERACTION.html](https://www.gsea-msigdb.org/gsea/msigdb/human/geneset/KEGG_CYTOKINE_CYTOKINE_RECEPTOR_INTERACTION.html) (265 genes)

| NCBI (Entrez)<br>Gene Id | Gene<br>Symbol | Gene Description                             |
|--------------------------|----------------|----------------------------------------------|
| 10344                    | CCL26          | C-C motif chemokine ligand 26 [Source:HGN... |
| 10563                    | CXCL13         | C-X-C motif chemokine ligand 13 [Source:H... |
| 10663                    | CXCR6          | C-X-C motif chemokine receptor 6 [Source:... |
| 10673                    | TNFSF13B       | TNF superfamily member 13b [Source:HGNC S... |
| 10803                    | CCR9           | C-C motif chemokine receptor 9 [Source:HG... |
| 10850                    | CCL27          | C-C motif chemokine ligand 27 [Source:HGN... |
| 10913                    | EDAR           | ectodysplasin A receptor [Source:HGNC Sym... |
| 11009                    | IL24           | interleukin 24 [Source:HGNC Symbol;Acc:HG... |
| 115650                   | TNFRSF13C      | TNF receptor superfamily member 13C [Sour... |
| 116379                   | IL22RA2        | interleukin 22 receptor subunit alpha 2 [... |
| 1230                     | CCR1           | C-C motif chemokine receptor 1 [Source:HG... |
| 1232                     | CCR3           | C-C motif chemokine receptor 3 [Source:HG... |
| 1233                     | CCR4           | C-C motif chemokine receptor 4 [Source:HG... |
| 1234                     | CCR5           | C-C motif chemokine receptor 5 [Source:HG... |
| 1235                     | CCR6           | C-C motif chemokine receptor 6 [Source:HG... |
| 1236                     | CCR7           | C-C motif chemokine receptor 7 [Source:HG... |
| 1237                     | CCR8           | C-C motif chemokine receptor 8 [Source:HG... |
| 1270                     | CNTF           | ciliary neurotrophic factor [Source:HGNC ... |
| 1271                     | CNTFR          | ciliary neurotrophic factor receptor [Sou... |
| 1435                     | CSF1           | colony stimulating factor 1 [Source:HGNC ... |
| 1436                     | CSF1R          | colony stimulating factor 1 receptor [Sou... |
| 1437                     | CSF2           | colony stimulating factor 2 [Source:HGNC ... |
| 1438                     | CSF2RA         | colony stimulating factor 2 receptor subu... |
| 1439                     | CSF2RB         | colony stimulating factor 2 receptor subu... |
| 1440                     | CSF3           | colony stimulating factor 3 [Source:HGNC ... |
| 1441                     | CSF3R          | colony stimulating factor 3 receptor [Sou... |
| 1489                     | CTF1           | cardiotrophin 1 [Source:HGNC Symbol;Acc:H... |
| 149233                   | IL23R          | interleukin 23 receptor [Source:HGNC Symb... |
| 1524                     | CX3CR1         | C-X3-C motif chemokine receptor 1 [Source... |
| 163702                   | IFNLR1         | interferon lambda receptor 1 [Source:HGNC... |
| 1896                     | EDA            | ectodysplasin A [Source:HGNC Symbol;Acc:H... |

|        |           |                                              |
|--------|-----------|----------------------------------------------|
| 1950   | EGF       | epidermal growth factor [Source:HGNC Symb... |
| 1956   | EGFR      | epidermal growth factor receptor [Source:... |
| 2056   | EPO       | erythropoietin [Source:HGNC Symbol;Acc:HG... |
| 2057   | EPOR      | erythropoietin receptor [Source:HGNC Symb... |
| 2277   | VEGFD     | vascular endothelial growth factor D [Sou... |
| 2321   | FLT1      | fms related receptor tyrosine kinase 1 [S... |
| 2322   | FLT3      | fms related receptor tyrosine kinase 3 [S... |
| 2323   | FLT3LG    | fms related receptor tyrosine kinase 3 li... |
| 2324   | FLT4      | fms related receptor tyrosine kinase 4 [S... |
| 23495  | TNFRSF13B | TNF receptor superfamily member 13B [Sour... |
| 23529  | CLCF1     | cardiotrophin like cytokine factor 1 [Sou... |
| 23765  | IL17RA    | interleukin 17 receptor A [Source:HGNC Sy... |
| 268    | AMH       | anti-Mullerian hormone [Source:HGNC Symbo... |
| 2688   | GH1       | growth hormone 1 [Source:HGNC Symbol;Acc:... |
| 2689   | GH2       | growth hormone 2 [Source:HGNC Symbol;Acc:... |
| 269    | AMHR2     | anti-Mullerian hormone receptor type 2 [S... |
| 2690   | GHR       | growth hormone receptor [Source:HGNC Symb... |
| 27190  | IL17B     | interleukin 17B [Source:HGNC Symbol;Acc:H... |
| 27242  | TNFRSF21  | TNF receptor superfamily member 21 [Sourc... |
| 2826   | CCR10     | C-C motif chemokine receptor 10 [Source:H... |
| 282616 | IFNL2     | interferon lambda 2 [Source:HGNC Symbol;A... |
| 282617 | IFNL3     | interferon lambda 3 [Source:HGNC Symbol;A... |
| 282618 | IFNL1     | interferon lambda 1 [Source:HGNC Symbol;A... |
| 2829   | XCR1      | X-C motif chemokine receptor 1 [Source:HG... |
| 2833   | CXCR3     | C-X-C motif chemokine receptor 3 [Source:... |
| 2919   | CXCL1     | C-X-C motif chemokine ligand 1 [Source:HG... |
| 2920   | CXCL2     | C-X-C motif chemokine ligand 2 [Source:HG... |
| 2921   | CXCL3     | C-X-C motif chemokine ligand 3 [Source:HG... |
| 29949  | IL19      | interleukin 19 [Source:HGNC Symbol;Acc:HG... |
| 3082   | HGF       | hepatocyte growth factor [Source:HGNC Sym... |
| 338376 | IFNE      | interferon epsilon [Source:HGNC Symbol;Ac... |
| 3439   | IFNA1     | interferon alpha 1 [Source:HGNC Symbol;Ac... |
| 3440   | IFNA2     | interferon alpha 2 [Source:HGNC Symbol;Ac... |
| 3441   | IFNA4     | interferon alpha 4 [Source:HGNC Symbol;Ac... |
| 3442   | IFNA5     | interferon alpha 5 [Source:HGNC Symbol;Ac... |
| 3443   | IFNA6     | interferon alpha 6 [Source:HGNC Symbol;Ac... |
| 3444   | IFNA7     | interferon alpha 7 [Source:HGNC Symbol;Ac... |
| 3445   | IFNA8     | interferon alpha 8 [Source:HGNC Symbol;Ac... |
| 3446   | IFNA10    | interferon alpha 10 [Source:HGNC Symbol;A... |
| 3447   | IFNA13    | interferon alpha 13 [Source:HGNC Symbol;A... |
| 3448   | IFNA14    | interferon alpha 14 [Source:HGNC Symbol;A... |
| 3449   | IFNA16    | interferon alpha 16 [Source:HGNC Symbol;A... |
| 3451   | IFNA17    | interferon alpha 17 [Source:HGNC Symbol;A... |
| 3452   | IFNA21    | interferon alpha 21 [Source:HGNC Symbol;A... |
| 3454   | IFNAR1    | interferon alpha and beta receptor subuni... |
| 3455   | IFNAR2    | interferon alpha and beta receptor subuni... |

|      |         |                                              |
|------|---------|----------------------------------------------|
| 3456 | IFNB1   | interferon beta 1 [Source:HGNC Symbol;Acc... |
| 3458 | IFNG    | interferon gamma [Source:HGNC Symbol;Acc:... |
| 3459 | IFNGR1  | interferon gamma receptor 1 [Source:HGNC ... |
| 3460 | IFNGR2  | interferon gamma receptor 2 [Source:HGNC ... |
| 3467 | IFNW1   | interferon omega 1 [Source:HGNC Symbol;Ac... |
| 355  | FAS     | Fas cell surface death receptor [Source:H... |
| 3552 | IL1A    | interleukin 1 alpha [Source:HGNC Symbol;A... |
| 3553 | IL1B    | interleukin 1 beta [Source:HGNC Symbol;Ac... |
| 3554 | IL1R1   | interleukin 1 receptor type 1 [Source:HGN... |
| 3556 | IL1RAP  | interleukin 1 receptor accessory protein ... |
| 3558 | IL2     | interleukin 2 [Source:HGNC Symbol;Acc:HGN... |
| 3559 | IL2RA   | interleukin 2 receptor subunit alpha [Sou... |
| 356  | FASLG   | Fas ligand [Source:HGNC Symbol;Acc:HGNC:1... |
| 3560 | IL2RB   | interleukin 2 receptor subunit beta [Sour... |
| 3561 | IL2RG   | interleukin 2 receptor subunit gamma [Sou... |
| 3562 | IL3     | interleukin 3 [Source:HGNC Symbol;Acc:HGN... |
| 3563 | IL3RA   | interleukin 3 receptor subunit alpha [Sou... |
| 3565 | IL4     | interleukin 4 [Source:HGNC Symbol;Acc:HGN... |
| 3566 | IL4R    | interleukin 4 receptor [Source:HGNC Symbo... |
| 3567 | IL5     | interleukin 5 [Source:HGNC Symbol;Acc:HGN... |
| 3568 | IL5RA   | interleukin 5 receptor subunit alpha [Sou... |
| 3569 | IL6     | interleukin 6 [Source:HGNC Symbol;Acc:HGN... |
| 3570 | IL6R    | interleukin 6 receptor [Source:HGNC Symbo... |
| 3572 | IL6ST   | interleukin 6 cytokine family signal tran... |
| 3574 | IL7     | interleukin 7 [Source:HGNC Symbol;Acc:HGN... |
| 3575 | IL7R    | interleukin 7 receptor [Source:HGNC Symbo... |
| 3576 | CXCL8   | C-X-C motif chemokine ligand 8 [Source:HG... |
| 3577 | CXCR1   | C-X-C motif chemokine receptor 1 [Source:... |
| 3578 | IL9     | interleukin 9 [Source:HGNC Symbol;Acc:HGN... |
| 3579 | CXCR2   | C-X-C motif chemokine receptor 2 [Source:... |
| 3581 | IL9R    | interleukin 9 receptor [Source:HGNC Symbo... |
| 3586 | IL10    | interleukin 10 [Source:HGNC Symbol;Acc:HG... |
| 3587 | IL10RA  | interleukin 10 receptor subunit alpha [So... |
| 3588 | IL10RB  | interleukin 10 receptor subunit beta [Sou... |
| 3589 | IL11    | interleukin 11 [Source:HGNC Symbol;Acc:HG... |
| 3590 | IL11RA  | interleukin 11 receptor subunit alpha [So... |
| 3592 | IL12A   | interleukin 12A [Source:HGNC Symbol;Acc:H... |
| 3593 | IL12B   | interleukin 12B [Source:HGNC Symbol;Acc:H... |
| 3594 | IL12RB1 | interleukin 12 receptor subunit beta 1 [S... |
| 3595 | IL12RB2 | interleukin 12 receptor subunit beta 2 [S... |
| 3596 | IL13    | interleukin 13 [Source:HGNC Symbol;Acc:HG... |
| 3597 | IL13RA1 | interleukin 13 receptor subunit alpha 1 [... |
| 3600 | IL15    | interleukin 15 [Source:HGNC Symbol;Acc:HG... |
| 3601 | IL15RA  | interleukin 15 receptor subunit alpha [So... |
| 3604 | TNFRSF9 | TNF receptor superfamily member 9 [Source... |
| 3605 | IL17A   | interleukin 17A [Source:HGNC Symbol;Acc:H... |

|        |           |                                              |
|--------|-----------|----------------------------------------------|
| 3606   | IL18      | interleukin 18 [Source:HGNC Symbol;Acc:HG... |
| 3624   | INHBA     | inhibin subunit beta A [Source:HGNC Symbo... |
| 3625   | INHBB     | inhibin subunit beta B [Source:HGNC Symbo... |
| 3626   | INHBC     | inhibin subunit beta C [Source:HGNC Symbo... |
| 3627   | CXCL10    | C-X-C motif chemokine ligand 10 [Source:H... |
| 3791   | KDR       | kinase insert domain receptor [Source:HGN... |
| 3815   | KIT       | KIT proto-oncogene, receptor tyrosine kin... |
| 3952   | LEP       | leptin [Source:HGNC Symbol;Acc:HGNC:6553]    |
| 3953   | LEPR      | leptin receptor [Source:HGNC Symbol;Acc:H... |
| 3976   | LIF       | LIF interleukin 6 family cytokine [Source... |
| 3977   | LIFR      | LIF receptor subunit alpha [Source:HGNC S... |
| 4049   | LTA       | lymphotoxin alpha [Source:HGNC Symbol;Acc... |
| 4050   | LTB       | lymphotoxin beta [Source:HGNC Symbol;Acc...  |
| 4055   | LTBR      | lymphotoxin beta receptor [Source:HGNC Sy... |
| 414062 | CCL3L3    | C-C motif chemokine ligand 3 like 3 [Sour... |
| 4233   | MET       | MET proto-oncogene, receptor tyrosine kin... |
| 4254   | KITLG     | KIT ligand [Source:HGNC Symbol;Acc:HGNC:6... |
| 4283   | CXCL9     | C-X-C motif chemokine ligand 9 [Source:HG... |
| 4352   | MPL       | MPL proto-oncogene, thrombopoietin recept... |
| 4804   | NGFR      | nerve growth factor receptor [Source:HGNC... |
| 4982   | TNFRSF11B | TNF receptor superfamily member 11b [Sour... |
| 5008   | OSM       | oncostatin M [Source:HGNC Symbol;Acc:HGNC... |
| 50604  | IL20      | interleukin 20 [Source:HGNC Symbol;Acc:HG... |
| 50615  | IL21R     | interleukin 21 receptor [Source:HGNC Symb... |
| 50616  | IL22      | interleukin 22 [Source:HGNC Symbol;Acc:HG... |
| 51330  | TNFRSF12A | TNF receptor superfamily member 12A [Sour... |
| 5154   | PDGFA     | platelet derived growth factor subunit A ... |
| 5155   | PDGFB     | platelet derived growth factor subunit B ... |
| 5156   | PDGFRA    | platelet derived growth factor receptor a... |
| 51561  | IL23A     | interleukin 23 subunit alpha [Source:HGNC... |
| 5159   | PDGFRB    | platelet derived growth factor receptor b... |
| 5196   | PF4       | platelet factor 4 [Source:HGNC Symbol;Acc... |
| 5197   | PF4V1     | platelet factor 4 variant 1 [Source:HGNC ... |
| 53832  | IL20RA    | interleukin 20 receptor subunit alpha [So... |
| 53833  | IL20RB    | interleukin 20 receptor subunit beta [Sou... |
| 5473   | PPBP      | pro-platelet basic protein [Source:HGNC S... |
| 55504  | TNFRSF19  | TNF receptor superfamily member 19 [Sourc... |
| 55540  | IL17RB    | interleukin 17 receptor B [Source:HGNC Sy... |
| 55801  | IL26      | interleukin 26 [Source:HGNC Symbol;Acc:HG... |
| 56034  | PDGFC     | platelet derived growth factor C [Source:... |
| 5617   | PRL       | prolactin [Source:HGNC Symbol;Acc:HGNC:9445] |
| 5618   | PRLR      | prolactin receptor [Source:HGNC Symbol;Ac... |
| 56477  | CCL28     | C-C motif chemokine ligand 28 [Source:HGN... |
| 56832  | IFNK      | interferon kappa [Source:HGNC Symbol;Acc...  |
| 58191  | CXCL16    | C-X-C motif chemokine ligand 16 [Source:H... |
| 58985  | IL22RA1   | interleukin 22 receptor subunit alpha 1 [... |



|       |          |                                              |
|-------|----------|----------------------------------------------|
| 59067 | IL21     | interleukin 21 [Source:HGNC Symbol;Acc:HG... |
| 60401 | EDA2R    | ectodysplasin A2 receptor [Source:HGNC Sy... |
| 608   | TNFRSF17 | TNF receptor superfamily member 17 [Sourc... |
| 6346  | CCL1     | C-C motif chemokine ligand 1 [Source:HGNC... |
| 6347  | CCL2     | C-C motif chemokine ligand 2 [Source:HGNC... |
| 6348  | CCL3     | C-C motif chemokine ligand 3 [Source:HGNC... |
| 6349  | CCL3L1   | C-C motif chemokine ligand 3 like 1 [Sour... |
| 6351  | CCL4     | C-C motif chemokine ligand 4 [Source:HGNC... |
| 6352  | CCL5     | C-C motif chemokine ligand 5 [Source:HGNC... |
| 6354  | CCL7     | C-C motif chemokine ligand 7 [Source:HGNC... |
| 6355  | CCL8     | C-C motif chemokine ligand 8 [Source:HGNC... |
| 6356  | CCL11    | C-C motif chemokine ligand 11 [Source:HGN... |
| 6357  | CCL13    | C-C motif chemokine ligand 13 [Source:HGN... |
| 6358  | CCL14    | C-C motif chemokine ligand 14 [Source:HGN... |
| 6359  | CCL15    | C-C motif chemokine ligand 15 [Source:HGN... |
| 6360  | CCL16    | C-C motif chemokine ligand 16 [Source:HGN... |
| 6361  | CCL17    | C-C motif chemokine ligand 17 [Source:HGN... |
| 6362  | CCL18    | C-C motif chemokine ligand 18 [Source:HGN... |
| 6363  | CCL19    | C-C motif chemokine ligand 19 [Source:HGN... |
| 6364  | CCL20    | C-C motif chemokine ligand 20 [Source:HGN... |
| 6366  | CCL21    | C-C motif chemokine ligand 21 [Source:HGN... |
| 6367  | CCL22    | C-C motif chemokine ligand 22 [Source:HGN... |
| 6368  | CCL23    | C-C motif chemokine ligand 23 [Source:HGN... |
| 6369  | CCL24    | C-C motif chemokine ligand 24 [Source:HGN... |
| 6370  | CCL25    | C-C motif chemokine ligand 25 [Source:HGN... |
| 6372  | CXCL6    | C-X-C motif chemokine ligand 6 [Source:HG... |
| 6373  | CXCL11   | C-X-C motif chemokine ligand 11 [Source:H... |
| 6374  | CXCL5    | C-X-C motif chemokine ligand 5 [Source:HG... |
| 6375  | XCL1     | X-C motif chemokine ligand 1 [Source:HGNC... |
| 6376  | CX3CL1   | C-X3-C motif chemokine ligand 1 [Source:H... |
| 6387  | CXCL12   | C-X-C motif chemokine ligand 12 [Source:H... |
| 64109 | CRLF2    | cytokine receptor like factor 2 [Source:H... |
| 643   | CXCR5    | C-X-C motif chemokine receptor 5 [Source:... |
| 64806 | IL25     | interleukin 25 [Source:HGNC Symbol;Acc:HG... |
| 650   | BMP2     | bone morphogenetic protein 2 [Source:HGNC... |
| 655   | BMP7     | bone morphogenetic protein 7 [Source:HGNC... |
| 657   | BMPR1A   | bone morphogenetic protein receptor type ... |
| 658   | BMPR1B   | bone morphogenetic protein receptor type ... |
| 659   | BMPR2    | bone morphogenetic protein receptor type ... |
| 6846  | XCL2     | X-C motif chemokine ligand 2 [Source:HGNC... |
| 7040  | TGFB1    | transforming growth factor beta 1 [Source... |
| 7042  | TGFB2    | transforming growth factor beta 2 [Source... |
| 7043  | TGFB3    | transforming growth factor beta 3 [Source... |
| 7046  | TGFB1    | transforming growth factor beta receptor ... |
| 7048  | TGFB2    | transforming growth factor beta receptor ... |
| 7124  | TNF      | tumor necrosis factor [Source:HGNC Symbol... |



|        |           |                                               |
|--------|-----------|-----------------------------------------------|
| 7132   | TNFRSF1A  | TNF receptor superfamily member 1A [Sourc...  |
| 7133   | TNFRSF1B  | TNF receptor superfamily member 1B [Sourc...  |
| 7173   | TPO       | thyroid peroxidase [Source:HGNC Symbol;Ac...  |
| 728045 | PPBPP1    | pro-platelet basic protein pseudogene 1 [...  |
| 7292   | TNFSF4    | TNF superfamily member 4 [Source:HGNC Sym...  |
| 729230 | CCR2      | C-C motif chemokine receptor 2 [Source:HG...  |
| 7293   | TNFRSF4   | TNF receptor superfamily member 4 [Source...  |
| 7422   | VEGFA     | vascular endothelial growth factor A [Sou...  |
| 7423   | VEGFB     | vascular endothelial growth factor B [Sou...  |
| 7424   | VEGFC     | vascular endothelial growth factor C [Sou...  |
| 7850   | IL1R2     | interleukin 1 receptor type 2 [Source:HGNC... |
| 7852   | CXCR4     | C-X-C motif chemokine receptor 4 [Source:...  |
| 80301  | PLEKHO2   | pleckstrin homology domain containing O2 ...  |
| 8200   | GDF5      | growth differentiation factor 5 [Source:H...  |
| 83729  | INHBE     | inhibin subunit beta E [Source:HGNC Symbo...  |
| 84957  | RELT      | RELT TNF receptor [Source:HGNC Symbol;Acc...  |
| 85480  | TSLP      | thymic stromal lymphopoietin [Source:HGNC...  |
| 8600   | TNFSF11   | TNF superfamily member 11 [Source:HGNC Sy...  |
| 8718   | TNFRSF25  | TNF receptor superfamily member 25 [Sourc...  |
| 8740   | TNFSF14   | TNF superfamily member 14 [Source:HGNC Sy...  |
| 8741   | TNFSF13   | TNF superfamily member 13 [Source:HGNC Sy...  |
| 8742   | TNFSF12   | TNF superfamily member 12 [Source:HGNC Sy...  |
| 8743   | TNFSF10   | TNF superfamily member 10 [Source:HGNC Sy...  |
| 8744   | TNFSF9    | TNF superfamily member 9 [Source:HGNC Sym...  |
| 8764   | TNFRSF14  | TNF receptor superfamily member 14 [Sourc...  |
| 8771   | TNFRSF6B  | TNF receptor superfamily member 6b [Sourc...  |
| 8784   | TNFRSF18  | TNF receptor superfamily member 18 [Sourc...  |
| 8792   | TNFRSF11A | TNF receptor superfamily member 11a [Sour...  |
| 8793   | TNFRSF10D | TNF receptor superfamily member 10d [Sour...  |
| 8794   | TNFRSF10C | TNF receptor superfamily member 10c [Sour...  |
| 8795   | TNFRSF10B | TNF receptor superfamily member 10b [Sour...  |
| 8797   | TNFRSF10A | TNF receptor superfamily member 10a [Sour...  |
| 8807   | IL18RAP   | interleukin 18 receptor accessory protein...  |
| 8809   | IL18R1    | interleukin 18 receptor 1 [Source:HGNC Sy...  |
| 8995   | TNFSF18   | TNF superfamily member 18 [Source:HGNC Sy...  |
| 90     | ACVR1     | activin A receptor type 1 [Source:HGNC Sy...  |
| 91     | ACVR1B    | activin A receptor type 1B [Source:HGNC S...  |
| 9180   | OSMR      | oncostatin M receptor [Source:HGNC Symbol...  |
| 92     | ACVR2A    | activin A receptor type 2A [Source:HGNC S...  |
| 93     | ACVR2B    | activin A receptor type 2B [Source:HGNC S...  |
| 939    | CD27      | CD27 molecule [Source:HGNC Symbol;Acc:HGNC... |
| 94     | ACVRL1    | activin A receptor like type 1 [Source:HG...  |
| 943    | TNFRSF8   | TNF receptor superfamily member 8 [Source...  |
| 944    | TNFSF8    | TNF superfamily member 8 [Source:HGNC Sym...  |
| 9547   | CXCL14    | C-X-C motif chemokine ligand 14 [Source:H...  |
| 9560   | CCL4L2    | C-C motif chemokine ligand 4 like 2 [Sour...  |

|      |         |                                              |
|------|---------|----------------------------------------------|
| 958  | CD40    | CD40 molecule [Source:HGNC Symbol;Acc:HGN... |
| 959  | CD40LG  | CD40 ligand [Source:HGNC Symbol;Acc:HGNC:... |
| 970  | CD70    | CD70 molecule [Source:HGNC Symbol;Acc:HGN... |
| 9966 | TNFSF15 | TNF superfamily member 15 [Source:HGNC Sy... |

### S3D - JAK-STAT-signaling

[https://www.gsea-msigdb.org/gsea/msigdb/human/geneset/KEGG\\_JAK\\_STAT\\_SIGNALING\\_PATHWAY.html](https://www.gsea-msigdb.org/gsea/msigdb/human/geneset/KEGG_JAK_STAT_SIGNALING_PATHWAY.html) (155 genes)

| NCBI (Entrez)<br>Gene Id | Gene<br>Symbol | Gene Description                               |
|--------------------------|----------------|------------------------------------------------|
| 10000                    | AKT3           | AKT serine/threonine kinase 3 [Source:HGNC ... |
| 10251                    | SPRY3          | sprouty RTK signaling antagonist 3 [Source:... |
| 10252                    | SPRY1          | sprouty RTK signaling antagonist 1 [Source:... |
| 10253                    | SPRY2          | sprouty RTK signaling antagonist 2 [Source:... |
| 10254                    | STAM2          | signal transducing adaptor molecule 2 [Sour... |
| 10379                    | IRF9           | interferon regulatory factor 9 [Source:HGNC... |
| 10401                    | PIAS3          | protein inhibitor of activated STAT 3 [Sour... |
| 11009                    | IL24           | interleukin 24 [Source:HGNC Symbol;Acc:HGNC... |
| 1154                     | CISH           | cytokine inducible SH2 containing protein [... |
| 116379                   | IL22RA2        | interleukin 22 receptor subunit alpha 2 [So... |
| 122809                   | SOCS4          | suppressor of cytokine signaling 4 [Source:... |
| 1270                     | CNTF           | ciliary neurotrophic factor [Source:HGNC Sy... |
| 1271                     | CNTFR          | ciliary neurotrophic factor receptor [Sourc... |
| 1387                     | CREBBP         | CREB binding protein [Source:HGNC Symbol;Ac... |
| 1437                     | CSF2           | colony stimulating factor 2 [Source:HGNC Sy... |
| 1438                     | CSF2RA         | colony stimulating factor 2 receptor subuni... |
| 1439                     | CSF2RB         | colony stimulating factor 2 receptor subuni... |
| 1440                     | CSF3           | colony stimulating factor 3 [Source:HGNC Sy... |
| 1441                     | CSF3R          | colony stimulating factor 3 receptor [Sourc... |
| 1442                     | CSH1           | chorionic somatomammotropin hormone 1 [Sour... |
| 1489                     | CTF1           | cardiotrophin 1 [Source:HGNC Symbol;Acc:HGN... |
| 149233                   | IL23R          | interleukin 23 receptor [Source:HGNC Symbol... |
| 161742                   | SPRED1         | sprouty related EVH1 domain containing 1 [S... |
| 163702                   | IFNLR1         | interferon lambda receptor 1 [Source:HGNC S... |
| 200734                   | SPRED2         | sprouty related EVH1 domain containing 2 [S... |
| 2033                     | EP300          | E1A binding protein p300 [Source:HGNC Symbo... |
| 2056                     | EPO            | erythropoietin [Source:HGNC Symbol;Acc:HGNC... |
| 2057                     | EPOR           | erythropoietin receptor [Source:HGNC Symbol... |
| 207                      | AKT1           | AKT serine/threonine kinase 1 [Source:HGNC ... |
| 208                      | AKT2           | AKT serine/threonine kinase 2 [Source:HGNC ... |
| 23529                    | CLCF1          | cardiotrophin like cytokine factor 1 [Sourc... |
| 23533                    | PIK3R5         | phosphoinositide-3-kinase regulatory subuni... |
| 23624                    | CBLC           | Cbl proto-oncogene C [Source:HGNC Symbol;Ac... |
| 2688                     | GH1            | growth hormone 1 [Source:HGNC Symbol;Acc:HG... |
| 2689                     | GH2            | growth hormone 2 [Source:HGNC Symbol;Acc:HG... |

|        |        |                                                    |
|--------|--------|----------------------------------------------------|
| 2690   | GHR    | growth hormone receptor [Source:HGNC Symbol;Acc... |
| 282616 | IFNL2  | interferon lambda 2 [Source:HGNC Symbol;Acc...     |
| 282617 | IFNL3  | interferon lambda 3 [Source:HGNC Symbol;Acc...     |
| 282618 | IFNL1  | interferon lambda 1 [Source:HGNC Symbol;Acc...     |
| 2885   | GRB2   | growth factor receptor bound protein 2 [Sou...     |
| 29949  | IL19   | interleukin 19 [Source:HGNC Symbol;Acc:HGNC...     |
| 30837  | SOCS7  | suppressor of cytokine signaling 7 [Source:...     |
| 338376 | IFNE   | interferon epsilon [Source:HGNC Symbol;Acc:...     |
| 3439   | IFNA1  | interferon alpha 1 [Source:HGNC Symbol;Acc:...     |
| 3440   | IFNA2  | interferon alpha 2 [Source:HGNC Symbol;Acc:...     |
| 3441   | IFNA4  | interferon alpha 4 [Source:HGNC Symbol;Acc:...     |
| 3442   | IFNA5  | interferon alpha 5 [Source:HGNC Symbol;Acc:...     |
| 3443   | IFNA6  | interferon alpha 6 [Source:HGNC Symbol;Acc:...     |
| 3444   | IFNA7  | interferon alpha 7 [Source:HGNC Symbol;Acc:...     |
| 3445   | IFNA8  | interferon alpha 8 [Source:HGNC Symbol;Acc:...     |
| 3446   | IFNA10 | interferon alpha 10 [Source:HGNC Symbol;Acc...     |
| 3447   | IFNA13 | interferon alpha 13 [Source:HGNC Symbol;Acc...     |
| 3448   | IFNA14 | interferon alpha 14 [Source:HGNC Symbol;Acc...     |
| 3449   | IFNA16 | interferon alpha 16 [Source:HGNC Symbol;Acc...     |
| 3451   | IFNA17 | interferon alpha 17 [Source:HGNC Symbol;Acc...     |
| 3452   | IFNA21 | interferon alpha 21 [Source:HGNC Symbol;Acc...     |
| 3454   | IFNAR1 | interferon alpha and beta receptor subunit ...     |
| 3455   | IFNAR2 | interferon alpha and beta receptor subunit ...     |
| 3456   | IFNB1  | interferon beta 1 [Source:HGNC Symbol;Acc:H...     |
| 3458   | IFNG   | interferon gamma [Source:HGNC Symbol;Acc:HG...     |
| 3459   | IFNGR1 | interferon gamma receptor 1 [Source:HGNC Sy...     |
| 3460   | IFNGR2 | interferon gamma receptor 2 [Source:HGNC Sy...     |
| 3467   | IFNW1  | interferon omega 1 [Source:HGNC Symbol;Acc:...     |
| 3558   | IL2    | interleukin 2 [Source:HGNC Symbol;Acc:HGNC:...     |
| 3559   | IL2RA  | interleukin 2 receptor subunit alpha [Sourc...     |
| 3560   | IL2RB  | interleukin 2 receptor subunit beta [Source...     |
| 3561   | IL2RG  | interleukin 2 receptor subunit gamma [Sourc...     |
| 3562   | IL3    | interleukin 3 [Source:HGNC Symbol;Acc:HGNC:...     |
| 3563   | IL3RA  | interleukin 3 receptor subunit alpha [Sourc...     |
| 3565   | IL4    | interleukin 4 [Source:HGNC Symbol;Acc:HGNC:...     |
| 3566   | IL4R   | interleukin 4 receptor [Source:HGNC Symbol;...     |
| 3567   | IL5    | interleukin 5 [Source:HGNC Symbol;Acc:HGNC:...     |
| 3568   | IL5RA  | interleukin 5 receptor subunit alpha [Sourc...     |
| 3569   | IL6    | interleukin 6 [Source:HGNC Symbol;Acc:HGNC:...     |
| 3570   | IL6R   | interleukin 6 receptor [Source:HGNC Symbol;...     |
| 3572   | IL6ST  | interleukin 6 cytokine family signal transd...     |
| 3574   | IL7    | interleukin 7 [Source:HGNC Symbol;Acc:HGNC:...     |
| 3575   | IL7R   | interleukin 7 receptor [Source:HGNC Symbol;...     |
| 3578   | IL9    | interleukin 9 [Source:HGNC Symbol;Acc:HGNC:...     |
| 3581   | IL9R   | interleukin 9 receptor [Source:HGNC Symbol;...     |
| 3586   | IL10   | interleukin 10 [Source:HGNC Symbol;Acc:HGNC...     |

|       |                         |                                                |
|-------|-------------------------|------------------------------------------------|
| 3587  | <a href="#">IL10RA</a>  | interleukin 10 receptor subunit alpha [Sour... |
| 3588  | <a href="#">IL10RB</a>  | interleukin 10 receptor subunit beta [Sourc... |
| 3589  | <a href="#">IL11</a>    | interleukin 11 [Source:HGNC Symbol;Acc:HGNC... |
| 3590  | <a href="#">IL11RA</a>  | interleukin 11 receptor subunit alpha [Sour... |
| 3592  | <a href="#">IL12A</a>   | interleukin 12A [Source:HGNC Symbol;Acc:HGN... |
| 3593  | <a href="#">IL12B</a>   | interleukin 12B [Source:HGNC Symbol;Acc:HGN... |
| 3594  | <a href="#">IL12RB1</a> | interleukin 12 receptor subunit beta 1 [Sou... |
| 3595  | <a href="#">IL12RB2</a> | interleukin 12 receptor subunit beta 2 [Sou... |
| 3596  | <a href="#">IL13</a>    | interleukin 13 [Source:HGNC Symbol;Acc:HGNC... |
| 3597  | <a href="#">IL13RA1</a> | interleukin 13 receptor subunit alpha 1 [So... |
| 3598  | <a href="#">IL13RA2</a> | interleukin 13 receptor subunit alpha 2 [So... |
| 3600  | <a href="#">IL15</a>    | interleukin 15 [Source:HGNC Symbol;Acc:HGNC... |
| 3601  | <a href="#">IL15RA</a>  | interleukin 15 receptor subunit alpha [Sour... |
| 3716  | <a href="#">JAK1</a>    | Janus kinase 1 [Source:HGNC Symbol;Acc:HGNC... |
| 3717  | <a href="#">JAK2</a>    | Janus kinase 2 [Source:HGNC Symbol;Acc:HGNC... |
| 3718  | <a href="#">JAK3</a>    | Janus kinase 3 [Source:HGNC Symbol;Acc:HGNC... |
| 3952  | <a href="#">LEP</a>     | leptin [Source:HGNC Symbol;Acc:HGNC:6553]      |
| 3953  | <a href="#">LEPR</a>    | leptin receptor [Source:HGNC Symbol;Acc:HGN... |
| 3976  | <a href="#">LIF</a>     | LIF interleukin 6 family cytokine [Source:H... |
| 3977  | <a href="#">LIFR</a>    | LIF receptor subunit alpha [Source:HGNC Sym... |
| 4352  | <a href="#">MPL</a>     | MPL proto-oncogene, thrombopoietin receptor... |
| 4609  | <a href="#">MYC</a>     | MYC proto-oncogene, bHLH transcription fact... |
| 5008  | <a href="#">OSM</a>     | oncostatin M [Source:HGNC Symbol;Acc:HGNC:8... |
| 50604 | <a href="#">IL20</a>    | interleukin 20 [Source:HGNC Symbol;Acc:HGNC... |
| 50615 | <a href="#">IL21R</a>   | interleukin 21 receptor [Source:HGNC Symbol... |
| 50616 | <a href="#">IL22</a>    | interleukin 22 [Source:HGNC Symbol;Acc:HGNC... |
| 51561 | <a href="#">IL23A</a>   | interleukin 23 subunit alpha [Source:HGNC S... |
| 51588 | <a href="#">PIAS4</a>   | protein inhibitor of activated STAT 4 [Sour... |
| 5290  | <a href="#">PIK3CA</a>  | phosphatidylinositol-4,5-bisphosphate 3-kin... |
| 5291  | <a href="#">PIK3CB</a>  | phosphatidylinositol-4,5-bisphosphate 3-kin... |
| 5292  | <a href="#">PIM1</a>    | Pim-1 proto-oncogene, serine/threonine kina... |
| 5293  | <a href="#">PIK3CD</a>  | phosphatidylinositol-4,5-bisphosphate 3-kin... |
| 5294  | <a href="#">PIK3CG</a>  | phosphatidylinositol-4,5-bisphosphate 3-kin... |
| 5295  | <a href="#">PIK3R1</a>  | phosphoinositide-3-kinase regulatory subuni... |
| 5296  | <a href="#">PIK3R2</a>  | phosphoinositide-3-kinase regulatory subuni... |
| 53832 | <a href="#">IL20RA</a>  | interleukin 20 receptor subunit alpha [Sour... |
| 53833 | <a href="#">IL20RB</a>  | interleukin 20 receptor subunit beta [Sourc... |
| 55801 | <a href="#">IL26</a>    | interleukin 26 [Source:HGNC Symbol;Acc:HGNC... |
| 5617  | <a href="#">PRL</a>     | prolactin [Source:HGNC Symbol;Acc:HGNC:9445]   |
| 5618  | <a href="#">PRLR</a>    | prolactin receptor [Source:HGNC Symbol;Acc:... |
| 56832 | <a href="#">IFNK</a>    | interferon kappa [Source:HGNC Symbol;Acc:HG... |
| 5777  | <a href="#">PTPN6</a>   | protein tyrosine phosphatase non-receptor t... |
| 5781  | <a href="#">PTPN11</a>  | protein tyrosine phosphatase non-receptor t... |
| 58985 | <a href="#">IL22RA1</a> | interleukin 22 receptor subunit alpha 1 [So... |
| 59067 | <a href="#">IL21</a>    | interleukin 21 [Source:HGNC Symbol;Acc:HGNC... |
| 595   | <a href="#">CCND1</a>   | cyclin D1 [Source:HGNC Symbol;Acc:HGNC:1582]   |

|       |        |                                                |
|-------|--------|------------------------------------------------|
| 598   | BCL2L1 | BCL2 like 1 [Source:HGNC Symbol;Acc:HGNC:992]  |
| 64109 | CRLF2  | cytokine receptor like factor 2 [Source:HGN... |
| 6654  | SOS1   | SOS Ras/Rac guanine nucleotide exchange fac... |
| 6655  | SOS2   | SOS Ras/Rho guanine nucleotide exchange fac... |
| 6772  | STAT1  | signal transducer and activator of transcri... |
| 6773  | STAT2  | signal transducer and activator of transcri... |
| 6774  | STAT3  | signal transducer and activator of transcri... |
| 6775  | STAT4  | signal transducer and activator of transcri... |
| 6776  | STAT5A | signal transducer and activator of transcri... |
| 6777  | STAT5B | signal transducer and activator of transcri... |
| 6778  | STAT6  | signal transducer and activator of transcri... |
| 7173  | TPO    | thyroid peroxidase [Source:HGNC Symbol;Acc:... |
| 7297  | TYK2   | tyrosine kinase 2 [Source:HGNC Symbol;Acc:H... |
| 8027  | STAM   | signal transducing adaptor molecule [Source... |
| 81848 | SPRY4  | sprouty RTK signaling antagonist 4 [Source:... |
| 8503  | PIK3R3 | phosphoinositide-3-kinase regulatory subuni... |
| 85480 | TSLP   | thymic stromal lymphopoietin [Source:HGNC S... |
| 8554  | PIAS1  | protein inhibitor of activated STAT 1 [Sour... |
| 8651  | SOCS1  | suppressor of cytokine signaling 1 [Source:... |
| 867   | CBL    | Cbl proto-oncogene [Source:HGNC Symbol;Acc:... |
| 868   | CBLB   | Cbl proto-oncogene B [Source:HGNC Symbol;Ac... |
| 8835  | SOCS2  | suppressor of cytokine signaling 2 [Source:... |
| 894   | CCND2  | cyclin D2 [Source:HGNC Symbol;Acc:HGNC:1583]   |
| 896   | CCND3  | cyclin D3 [Source:HGNC Symbol;Acc:HGNC:1585]   |
| 9021  | SOCS3  | suppressor of cytokine signaling 3 [Source:... |
| 9063  | PIAS2  | protein inhibitor of activated STAT 2 [Sour... |
| 9180  | OSMR   | oncostatin M receptor [Source:HGNC Symbol;A... |
| 9655  | SOCS5  | suppressor of cytokine signaling 5 [Source:... |

#### S3E - Focal adhesion

[https://www.gsea-msigdb.org/gsea/msigdb/human/geneset/KEGG\\_FOCAL\\_ADHESION.html](https://www.gsea-msigdb.org/gsea/msigdb/human/geneset/KEGG_FOCAL_ADHESION.html)

(199 genes)

| NCBI (Entrez)<br>Gene Id | Gene<br>Symbol | Gene Description                               |
|--------------------------|----------------|------------------------------------------------|
| 10000                    | AKT3           | AKT serine/threonine kinase 3 [Source:HGNC...  |
| 10298                    | PAK4           | p21 (RAC1) activated kinase 4 [Source:HGNC...  |
| 10319                    | LAMC3          | laminin subunit gamma 3 [Source:HGNC Symbo...  |
| 103910                   | MYL12B         | myosin light chain 12B [Source:HGNC Symbol...  |
| 10398                    | MYL9           | myosin light chain 9 [Source:HGNC Symbol;A...  |
| 10451                    | VAV3           | vav guanine nucleotide exchange factor 3 [...  |
| 10627                    | MYL12A         | myosin light chain 12A [Source:HGNC Symbol...  |
| 1101                     | CHAD           | chondroadherin [Source:HGNC Symbol;Acc:HGNC... |
| 1277                     | COL1A1         | collagen type I alpha 1 chain [Source:HGNC...  |
| 1278                     | COL1A2         | collagen type I alpha 2 chain [Source:HGNC...  |

|        |          |                                               |
|--------|----------|-----------------------------------------------|
| 1280   | COL2A1   | collagen type II alpha 1 chain [Source:HGN... |
| 1281   | COL3A1   | collagen type III alpha 1 chain [Source:HG... |
| 1282   | COL4A1   | collagen type IV alpha 1 chain [Source:HGN... |
| 1284   | COL4A2   | collagen type IV alpha 2 chain [Source:HGN... |
| 1286   | COL4A4   | collagen type IV alpha 4 chain [Source:HGN... |
| 1288   | COL4A6   | collagen type IV alpha 6 chain [Source:HGN... |
| 1289   | COL5A1   | collagen type V alpha 1 chain [Source:HGNC... |
| 1290   | COL5A2   | collagen type V alpha 2 chain [Source:HGNC... |
| 1291   | COL6A1   | collagen type VI alpha 1 chain [Source:HGN... |
| 1292   | COL6A2   | collagen type VI alpha 2 chain [Source:HGN... |
| 1293   | COL6A3   | collagen type VI alpha 3 chain [Source:HGN... |
| 1301   | COL11A1  | collagen type XI alpha 1 chain [Source:HGN... |
| 1302   | COL11A2  | collagen type XI alpha 2 chain [Source:HGN... |
| 1311   | COMP     | cartilage oligomeric matrix protein [Sourc... |
| 131873 | COL6A6   | collagen type VI alpha 6 chain [Source:HGN... |
| 1398   | CRK      | CRK proto-oncogene, adaptor protein [Sourc... |
| 1399   | CRKL     | CRK like proto-oncogene, adaptor protein [... |
| 1499   | CTNNB1   | catenin beta 1 [Source:HGNC Symbol;Acc:HGN... |
| 1729   | DIAPH1   | diaphanous related formin 1 [Source:HGNC S... |
| 1793   | DOCK1    | dedicator of cytokinesis 1 [Source:HGNC Sy... |
| 1950   | EGF      | epidermal growth factor [Source:HGNC Symbo... |
| 1956   | EGFR     | epidermal growth factor receptor [Source:H... |
| 2002   | ELK1     | ETS transcription factor ELK1 [Source:HGNC... |
| 2064   | ERBB2    | erb-b2 receptor tyrosine kinase 2 [Source:... |
| 207    | AKT1     | AKT serine/threonine kinase 1 [Source:HGNC... |
| 208    | AKT2     | AKT serine/threonine kinase 2 [Source:HGNC... |
| 2277   | VEGFD    | vascular endothelial growth factor D [Sour... |
| 22798  | LAMB4    | laminin subunit beta 4 [Source:HGNC Symbol... |
| 22801  | ITGA11   | integrin subunit alpha 11 [Source:HGNC Sym... |
| 2316   | FLNA     | filamin A [Source:HGNC Symbol;Acc:HGNC:3754]  |
| 2317   | FLNB     | filamin B [Source:HGNC Symbol;Acc:HGNC:3755]  |
| 2318   | FLNC     | filamin C [Source:HGNC Symbol;Acc:HGNC:3756]  |
| 2321   | FLT1     | fms related receptor tyrosine kinase 1 [So... |
| 2324   | FLT4     | fms related receptor tyrosine kinase 4 [So... |
| 2335   | FN1      | fibronectin 1 [Source:HGNC Symbol;Acc:HGNC... |
| 23396  | PIP5K1C  | phosphatidylinositol-4-phosphate 5-kinase ... |
| 23533  | PIK3R5   | phosphoinositide-3-kinase regulatory subun... |
| 2534   | FYN      | FYN proto-oncogene, Src family tyrosine ki... |
| 25759  | SHC2     | SHC adaptor protein 2 [Source:HGNC Symbol;... |
| 284217 | LAMA1    | laminin subunit alpha 1 [Source:HGNC Symbo... |
| 2885   | GRB2     | growth factor receptor bound protein 2 [So... |
| 2889   | RAPGEF1  | Rap guanine nucleotide exchange factor 1 [... |
| 2909   | ARHGAP35 | Rho GTPase activating protein 35 [Source:H... |
| 2932   | GSK3B    | glycogen synthase kinase 3 beta [Source:HG... |
| 29780  | PARVB    | parvin beta [Source:HGNC Symbol;Acc:HGNC:1... |
| 29895  | MYLPF    | myosin light chain, phosphorylatable, fast... |

|        |          |                                               |
|--------|----------|-----------------------------------------------|
| 3082   | HGF      | hepatocyte growth factor [Source:HGNC Symb... |
| 3265   | HRAS     | HRas proto-oncogene, GTPase [Source:HGNC S... |
| 329    | BIRC2    | baculoviral IAP repeat containing 2 [Sourc... |
| 330    | BIRC3    | baculoviral IAP repeat containing 3 [Sourc... |
| 331    | XIAP     | X-linked inhibitor of apoptosis [Source:HG... |
| 3371   | TNC      | tenascin C [Source:HGNC Symbol;Acc:HGNC:5318] |
| 3381   | IBSP     | integrin binding sialoprotein [Source:HGNC... |
| 3479   | IGF1     | insulin like growth factor 1 [Source:HGNC ... |
| 3480   | IGF1R    | insulin like growth factor 1 receptor [Sou... |
| 3611   | ILK      | integrin linked kinase [Source:HGNC Symbol... |
| 3655   | ITGA6    | integrin subunit alpha 6 [Source:HGNC Symb... |
| 3672   | ITGA1    | integrin subunit alpha 1 [Source:HGNC Symb... |
| 3673   | ITGA2    | integrin subunit alpha 2 [Source:HGNC Symb... |
| 3674   | ITGA2B   | integrin subunit alpha 2b [Source:HGNC Sym... |
| 3675   | ITGA3    | integrin subunit alpha 3 [Source:HGNC Symb... |
| 3676   | ITGA4    | integrin subunit alpha 4 [Source:HGNC Symb... |
| 3678   | ITGA5    | integrin subunit alpha 5 [Source:HGNC Symb... |
| 3679   | ITGA7    | integrin subunit alpha 7 [Source:HGNC Symb... |
| 3680   | ITGA9    | integrin subunit alpha 9 [Source:HGNC Symb... |
| 3685   | ITGAV    | integrin subunit alpha V [Source:HGNC Symb... |
| 3688   | ITGB1    | integrin subunit beta 1 [Source:HGNC Symbo... |
| 3690   | ITGB3    | integrin subunit beta 3 [Source:HGNC Symbo... |
| 3691   | ITGB4    | integrin subunit beta 4 [Source:HGNC Symbo... |
| 3693   | ITGB5    | integrin subunit beta 5 [Source:HGNC Symbo... |
| 3694   | ITGB6    | integrin subunit beta 6 [Source:HGNC Symbo... |
| 3695   | ITGB7    | integrin subunit beta 7 [Source:HGNC Symbo... |
| 3696   | ITGB8    | integrin subunit beta 8 [Source:HGNC Symbo... |
| 3725   | JUN      | Jun proto-oncogene, AP-1 transcription fac... |
| 3791   | KDR      | kinase insert domain receptor [Source:HGNC... |
| 387    | RHOA     | ras homolog family member A [Source:HGNC S... |
| 3908   | LAMA2    | laminin subunit alpha 2 [Source:HGNC Symbo... |
| 3909   | LAMA3    | laminin subunit alpha 3 [Source:HGNC Symbo... |
| 3910   | LAMA4    | laminin subunit alpha 4 [Source:HGNC Symbo... |
| 3911   | LAMA5    | laminin subunit alpha 5 [Source:HGNC Symbo... |
| 3912   | LAMB1    | laminin subunit beta 1 [Source:HGNC Symbol... |
| 3913   | LAMB2    | laminin subunit beta 2 [Source:HGNC Symbol... |
| 3914   | LAMB3    | laminin subunit beta 3 [Source:HGNC Symbol... |
| 3915   | LAMC1    | laminin subunit gamma 1 [Source:HGNC Symbo... |
| 3918   | LAMC2    | laminin subunit gamma 2 [Source:HGNC Symbo... |
| 394    | ARHGAP5  | Rho GTPase activating protein 5 [Source:HG... |
| 399694 | SHC4     | SHC adaptor protein 4 [Source:HGNC Symbol;... |
| 4233   | MET      | MET proto-oncogene, receptor tyrosine kina... |
| 4633   | MYL2     | myosin light chain 2 [Source:HGNC Symbol;A... |
| 4636   | MYL5     | myosin light chain 5 [Source:HGNC Symbol;A... |
| 4638   | MYLK     | myosin light chain kinase [Source:HGNC Sym... |
| 4659   | PPP1R12A | protein phosphatase 1 regulatory subunit 1... |



|       |         |                                               |
|-------|---------|-----------------------------------------------|
| 50509 | COL5A3  | collagen type V alpha 3 chain [Source:HGNC... |
| 5058  | PAK1    | p21 (RAC1) activated kinase 1 [Source:HGNC... |
| 5062  | PAK2    | p21 (RAC1) activated kinase 2 [Source:HGNC... |
| 5063  | PAK3    | p21 (RAC1) activated kinase 3 [Source:HGNC... |
| 5154  | PDGFA   | platelet derived growth factor subunit A [... |
| 5155  | PDGFB   | platelet derived growth factor subunit B [... |
| 5156  | PDGFRA  | platelet derived growth factor receptor al... |
| 5159  | PDGFRB  | platelet derived growth factor receptor be... |
| 5170  | PDPK1   | 3-phosphoinositide dependent protein kinas... |
| 5228  | PGF     | placental growth factor [Source:HGNC Symbo... |
| 5290  | PIK3CA  | phosphatidylinositol-4,5-bisphosphate 3-ki... |
| 5291  | PIK3CB  | phosphatidylinositol-4,5-bisphosphate 3-ki... |
| 5293  | PIK3CD  | phosphatidylinositol-4,5-bisphosphate 3-ki... |
| 5294  | PIK3CG  | phosphatidylinositol-4,5-bisphosphate 3-ki... |
| 5295  | PIK3R1  | phosphoinositide-3-kinase regulatory subun... |
| 5296  | PIK3R2  | phosphoinositide-3-kinase regulatory subun... |
| 53358 | SHC3    | SHC adaptor protein 3 [Source:HGNC Symbol;... |
| 5499  | PPP1CA  | protein phosphatase 1 catalytic subunit al... |
| 5500  | PPP1CB  | protein phosphatase 1 catalytic subunit be... |
| 5501  | PPP1CC  | protein phosphatase 1 catalytic subunit ga... |
| 55742 | PARVA   | parvin alpha [Source:HGNC Symbol;Acc:HGNC:... |
| 5578  | PRKCA   | protein kinase C alpha [Source:HGNC Symbol... |
| 5579  | PRKCB   | protein kinase C beta [Source:HGNC Symbol;... |
| 5582  | PRKCG   | protein kinase C gamma [Source:HGNC Symbol... |
| 5594  | MAPK1   | mitogen-activated protein kinase 1 [Source... |
| 5595  | MAPK3   | mitogen-activated protein kinase 3 [Source... |
| 5599  | MAPK8   | mitogen-activated protein kinase 8 [Source... |
| 5601  | MAPK9   | mitogen-activated protein kinase 9 [Source... |
| 5602  | MAPK10  | mitogen-activated protein kinase 10 [Sourc... |
| 56034 | PDGFC   | platelet derived growth factor C [Source:H... |
| 5604  | MAP2K1  | mitogen-activated protein kinase kinase 1 ... |
| 5649  | RELN    | reelin [Source:HGNC Symbol;Acc:HGNC:9957]     |
| 56924 | PAK6    | p21 (RAC1) activated kinase 6 [Source:HGNC... |
| 57144 | PAK5    | p21 (RAC1) activated kinase 5 [Source:HGNC... |
| 572   | BAD     | BCL2 associated agonist of cell death [Sou... |
| 5728  | PTEN    | phosphatase and tensin homolog [Source:HGN... |
| 5747  | PTK2    | protein tyrosine kinase 2 [Source:HGNC Sym... |
| 5829  | PXN     | paxillin [Source:HGNC Symbol;Acc:HGNC:9718]   |
| 58498 | MYL7    | myosin light chain 7 [Source:HGNC Symbol;A... |
| 5879  | RAC1    | Rac family small GTPase 1 [Source:HGNC Sym... |
| 5880  | RAC2    | Rac family small GTPase 2 [Source:HGNC Sym... |
| 5881  | RAC3    | Rac family small GTPase 3 [Source:HGNC Sym... |
| 5894  | RAF1    | Raf-1 proto-oncogene, serine/threonine kin... |
| 5906  | RAP1A   | RAP1A, member of RAS oncogene family [Sour... |
| 5908  | RAP1B   | RAP1B, member of RAS oncogene family [Sour... |
| 5923  | RASGRF1 | Ras protein specific guanine nucleotide re... |



|       |        |                                               |
|-------|--------|-----------------------------------------------|
| 595   | CCND1  | cyclin D1 [Source:HGNC Symbol;Acc:HGNC:1582]  |
| 596   | BCL2   | BCL2 apoptosis regulator [Source:HGNC Symb... |
| 60    | ACTB   | actin beta [Source:HGNC Symbol;Acc:HGNC:132]  |
| 6093  | ROCK1  | Rho associated coiled-coil containing prot... |
| 63923 | TNN    | tenascin N [Source:HGNC Symbol;Acc:HGNC:22... |
| 64098 | PARVG  | parvin gamma [Source:HGNC Symbol;Acc:HGNC:... |
| 6464  | SHC1   | SHC adaptor protein 1 [Source:HGNC Symbol;... |
| 6654  | SOS1   | SOS Ras/Rac guanine nucleotide exchange fa... |
| 6655  | SOS2   | SOS Ras/Rho guanine nucleotide exchange fa... |
| 6696  | SPP1   | secreted phosphoprotein 1 [Source:HGNC Sym... |
| 6714  | SRC    | SRC proto-oncogene, non-receptor tyrosine ... |
| 673   | BRAF   | B-Raf proto-oncogene, serine/threonine kin... |
| 7057  | THBS1  | thrombospondin 1 [Source:HGNC Symbol;Acc:H... |
| 7058  | THBS2  | thrombospondin 2 [Source:HGNC Symbol;Acc:H... |
| 7059  | THBS3  | thrombospondin 3 [Source:HGNC Symbol;Acc:H... |
| 7060  | THBS4  | thrombospondin 4 [Source:HGNC Symbol;Acc:H... |
| 7094  | TLN1   | talin 1 [Source:HGNC Symbol;Acc:HGNC:11845]   |
| 71    | ACTG1  | actin gamma 1 [Source:HGNC Symbol;Acc:HGNC... |
| 7143  | TNR    | tenascin R [Source:HGNC Symbol;Acc:HGNC:11... |
| 7148  | TNXB   | tenascin XB [Source:HGNC Symbol;Acc:HGNC:1... |
| 7408  | VASP   | vasodilator stimulated phosphoprotein [Sou... |
| 7409  | VAV1   | vav guanine nucleotide exchange factor 1 [... |
| 7410  | VAV2   | vav guanine nucleotide exchange factor 2 [... |
| 7414  | VCL    | vinculin [Source:HGNC Symbol;Acc:HGNC:12665]  |
| 7422  | VEGFA  | vascular endothelial growth factor A [Sour... |
| 7423  | VEGFB  | vascular endothelial growth factor B [Sour... |
| 7424  | VEGFC  | vascular endothelial growth factor C [Sour... |
| 7448  | VTN    | vitronectin [Source:HGNC Symbol;Acc:HGNC:1... |
| 7450  | VWF    | von Willebrand factor [Source:HGNC Symbol;... |
| 7791  | ZYX    | zyxin [Source:HGNC Symbol;Acc:HGNC:13200]     |
| 80310 | PDGFD  | platelet derived growth factor D [Source:H... |
| 81    | ACTN4  | actinin alpha 4 [Source:HGNC Symbol;Acc:HG... |
| 824   | CAPN2  | calpain 2 [Source:HGNC Symbol;Acc:HGNC:1479]  |
| 83660 | TLN2   | talin 2 [Source:HGNC Symbol;Acc:HGNC:15447]   |
| 8503  | PIK3R3 | phosphoinositide-3-kinase regulatory subun... |
| 8515  | ITGA10 | integrin subunit alpha 10 [Source:HGNC Sym... |
| 8516  | ITGA8  | integrin subunit alpha 8 [Source:HGNC Symb... |
| 85366 | MYLK2  | myosin light chain kinase 2 [Source:HGNC S... |
| 857   | CAV1   | caveolin 1 [Source:HGNC Symbol;Acc:HGNC:1527] |
| 858   | CAV2   | caveolin 2 [Source:HGNC Symbol;Acc:HGNC:1528] |
| 859   | CAV3   | caveolin 3 [Source:HGNC Symbol;Acc:HGNC:1529] |
| 87    | ACTN1  | actinin alpha 1 [Source:HGNC Symbol;Acc:HG... |
| 88    | ACTN2  | actinin alpha 2 [Source:HGNC Symbol;Acc:HG... |
| 89    | ACTN3  | actinin alpha 3 [Source:HGNC Symbol;Acc:HG... |
| 894   | CCND2  | cyclin D2 [Source:HGNC Symbol;Acc:HGNC:1583]  |
| 896   | CCND3  | cyclin D3 [Source:HGNC Symbol;Acc:HGNC:1585]  |

|       |       |                                               |
|-------|-------|-----------------------------------------------|
| 91807 | MYLK3 | myosin light chain kinase 3 [Source:HGNC S... |
| 93408 | MYL10 | myosin light chain 10 [Source:HGNC Symbol;... |
| 9475  | ROCK2 | Rho associated coiled-coil containing prot... |
| 9564  | BCAR1 | BCAR1 scaffold protein, Cas family member ... |
| 998   | CDC42 | cell division cycle 42 [Source:HGNC Symbol... |

### S3F - GAP junction

[https://www.gsea-msigdb.org/gsea/msigdb/human/geneset/KEGG\\_GAP\\_JUNCTION.html](https://www.gsea-msigdb.org/gsea/msigdb/human/geneset/KEGG_GAP_JUNCTION.html)

(90 genes)

| NCBI (Entrez)<br>Gene Id | Gene<br>Symbol | Gene Description                               |
|--------------------------|----------------|------------------------------------------------|
| 10376                    | TUBA1B         | tubulin alpha 1b [Source:HGNC Symbol;Acc:HG... |
| 10381                    | TUBB3          | tubulin beta 3 class III [Source:HGNC Symbo... |
| 10382                    | TUBB4A         | tubulin beta 4A class IVa [Source:HGNC Symb... |
| 10383                    | TUBB4B         | tubulin beta 4B class IVb [Source:HGNC Symb... |
| 107                      | ADCY1          | adenylate cyclase 1 [Source:HGNC Symbol;Acc... |
| 10746                    | MAP3K2         | mitogen-activated protein kinase kinase kin... |
| 108                      | ADCY2          | adenylate cyclase 2 [Source:HGNC Symbol;Acc... |
| 109                      | ADCY3          | adenylate cyclase 3 [Source:HGNC Symbol;Acc... |
| 111                      | ADCY5          | adenylate cyclase 5 [Source:HGNC Symbol;Acc... |
| 112                      | ADCY6          | adenylate cyclase 6 [Source:HGNC Symbol;Acc... |
| 112714                   | TUBA3E         | tubulin alpha 3e [Source:HGNC Symbol;Acc:HG... |
| 113                      | ADCY7          | adenylate cyclase 7 [Source:HGNC Symbol;Acc... |
| 113457                   | TUBA3D         | tubulin alpha 3d [Source:HGNC Symbol;Acc:HG... |
| 114                      | ADCY8          | adenylate cyclase 8 [Source:HGNC Symbol;Acc... |
| 115                      | ADCY9          | adenylate cyclase 9 [Source:HGNC Symbol;Acc... |
| 1453                     | CSNK1D         | casein kinase 1 delta [Source:HGNC Symbol;A... |
| 153                      | ADRB1          | adrenoceptor beta 1 [Source:HGNC Symbol;Acc... |
| 1812                     | DRD1           | dopamine receptor D1 [Source:HGNC Symbol;Ac... |
| 1813                     | DRD2           | dopamine receptor D2 [Source:HGNC Symbol;Ac... |
| 1902                     | LPAR1          | lysophosphatidic acid receptor 1 [Source:HG... |
| 1950                     | EGF            | epidermal growth factor [Source:HGNC Symbol... |
| 1956                     | EGFR           | epidermal growth factor receptor [Source:HG... |
| 196883                   | ADCY4          | adenylate cyclase 4 [Source:HGNC Symbol;Acc... |
| 203068                   | TUBB           | tubulin beta class I [Source:HGNC Symbol;Ac... |
| 23236                    | PLCB1          | phospholipase C beta 1 [Source:HGNC Symbol;... |
| 2697                     | GJA1           | gap junction protein alpha 1 [Source:HGNC S... |
| 2767                     | GNAI1          | G protein subunit alpha 11 [Source:HGNC Sym... |
| 2770                     | GNAI1          | G protein subunit alpha i1 [Source:HGNC Sym... |
| 2771                     | GNAI2          | G protein subunit alpha i2 [Source:HGNC Sym... |
| 2773                     | GNAI3          | G protein subunit alpha i3 [Source:HGNC Sym... |
| 2776                     | GNAQ           | G protein subunit alpha q [Source:HGNC Symb... |
| 2778                     | GNAS           | GNAS complex locus [Source:HGNC Symbol;Acc:... |
| 2885                     | GRB2           | growth factor receptor bound protein 2 [Sou... |
| 2911                     | GRM1           | glutamate metabotropic receptor 1 [Source:H... |

|        |         |                                                 |
|--------|---------|-------------------------------------------------|
| 2915   | GRM5    | glutamate metabotropic receptor 5 [Source:H...  |
| 2977   | GUCY1A2 | guanylate cyclase 1 soluble subunit alpha 2...  |
| 2982   | GUCY1A1 | guanylate cyclase 1 soluble subunit alpha 1...  |
| 2983   | GUCY1B1 | guanylate cyclase 1 soluble subunit beta 1 ...  |
| 3265   | HRAS    | HRas proto-oncogene, GTPase [Source:HGNC Sy...  |
| 3356   | HTR2A   | 5-hydroxytryptamine receptor 2A [Source:HGN...  |
| 3357   | HTR2B   | 5-hydroxytryptamine receptor 2B [Source:HGN...  |
| 3358   | HTR2C   | 5-hydroxytryptamine receptor 2C [Source:HGN...  |
| 347688 | TUBB8   | tubulin beta 8 class VIII [Source:HGNC Symb...  |
| 347733 | TUBB2B  | tubulin beta 2B class IIb [Source:HGNC Symb...  |
| 3708   | ITPR1   | inositol 1,4,5-trisphosphate receptor type ...  |
| 3709   | ITPR2   | inositol 1,4,5-trisphosphate receptor type ...  |
| 3710   | ITPR3   | inositol 1,4,5-trisphosphate receptor type ...  |
| 3845   | KRAS    | KRAS proto-oncogene, GTPase [Source:HGNC Sy...  |
| 4893   | NRAS    | NRAS proto-oncogene, GTPase [Source:HGNC Sy...  |
| 5154   | PDGFA   | platelet derived growth factor subunit A [S...  |
| 5155   | PDGFB   | platelet derived growth factor subunit B [S...  |
| 5156   | PDGFRA  | platelet derived growth factor receptor alp...  |
| 5159   | PDGFRB  | platelet derived growth factor receptor bet...  |
| 51807  | TUBA8   | tubulin alpha 8 [Source:HGNC Symbol;Acc:HGNC... |
| 5330   | PLCB2   | phospholipase C beta 2 [Source:HGNC Symbol;...  |
| 5331   | PLCB3   | phospholipase C beta 3 [Source:HGNC Symbol;...  |
| 5332   | PLCB4   | phospholipase C beta 4 [Source:HGNC Symbol;...  |
| 5566   | PRKACA  | protein kinase cAMP-activated catalytic sub...  |
| 5567   | PRKACB  | protein kinase cAMP-activated catalytic sub...  |
| 5568   | PRKACG  | protein kinase cAMP-activated catalytic sub...  |
| 5578   | PRKCA   | protein kinase C alpha [Source:HGNC Symbol;...  |
| 5579   | PRKCB   | protein kinase C beta [Source:HGNC Symbol;A...  |
| 5582   | PRKCG   | protein kinase C gamma [Source:HGNC Symbol;...  |
| 5592   | PRKG1   | protein kinase cGMP-dependent 1 [Source:HGN...  |
| 5593   | PRKG2   | protein kinase cGMP-dependent 2 [Source:HGN...  |
| 5594   | MAPK1   | mitogen-activated protein kinase 1 [Source:...  |
| 5595   | MAPK3   | mitogen-activated protein kinase 3 [Source:...  |
| 5598   | MAPK7   | mitogen-activated protein kinase 7 [Source:...  |
| 56034  | PDGFC   | platelet derived growth factor C [Source:HG...  |
| 5604   | MAP2K1  | mitogen-activated protein kinase kinase 1 [...  |
| 5605   | MAP2K2  | mitogen-activated protein kinase kinase 2 [...  |
| 5607   | MAP2K5  | mitogen-activated protein kinase kinase 5 [...  |
| 5613   | PRKX    | protein kinase X-linked [Source:HGNC Symbol...  |
| 56604  | TUBB7P  | tubulin beta 7 pseudogene [Source:HGNC Symb...  |
| 57369  | GJD2    | gap junction protein delta 2 [Source:HGNC S...  |
| 5894   | RAF1    | Raf-1 proto-oncogene, serine/threonine kina...  |
| 6654   | SOS1    | SOS Ras/Rac guanine nucleotide exchange fac...  |
| 6655   | SOS2    | SOS Ras/Rho guanine nucleotide exchange fac...  |
| 6714   | SRC     | SRC proto-oncogene, non-receptor tyrosine k...  |
| 7082   | TJP1    | tight junction protein 1 [Source:HGNC Symbo...  |

|       |        |                                                |
|-------|--------|------------------------------------------------|
| 7277  | TUBA4A | tubulin alpha 4a [Source:HGNC Symbol;Acc:HG... |
| 7278  | TUBA3C | tubulin alpha 3c [Source:HGNC Symbol;Acc:HG... |
| 7280  | TUBB2A | tubulin beta 2A class IIa [Source:HGNC Symb... |
| 7846  | TUBA1A | tubulin alpha 1a [Source:HGNC Symbol;Acc:HG... |
| 79861 | TUBAL3 | tubulin alpha like 3 [Source:HGNC Symbol;Ac... |
| 80310 | PDGFD  | platelet derived growth factor D [Source:HG... |
| 81027 | TUBB1  | tubulin beta 1 class VI [Source:HGNC Symbol... |
| 84617 | TUBB6  | tubulin beta 6 class V [Source:HGNC Symbol;... |
| 84790 | TUBA1C | tubulin alpha 1c [Source:HGNC Symbol;Acc:HG... |
| 983   | CDK1   | cyclin dependent kinase 1 [Source:HGNC Symb... |

### S3G - Extracellular matrix receptor interaction

[https://www.gsea-msigdb.org/gsea/msigdb/human/geneset/KEGG\\_ECM\\_RECEPTOR\\_INTERACTION.html](https://www.gsea-msigdb.org/gsea/msigdb/human/geneset/KEGG_ECM_RECEPTOR_INTERACTION.html)

(84 genes)

| NCBI (Entrez)<br>Gene Id | Gene<br>Symbol          | Gene Description                                               |
|--------------------------|-------------------------|----------------------------------------------------------------|
| <a href="#">10319</a>    | <a href="#">LAMC3</a>   | <a href="#">laminin subunit gamma 3 [Source:HGNC Symbol...</a> |
| <a href="#">1101</a>     | <a href="#">CHAD</a>    | <a href="#">chondroadherin [Source:HGNC Symbol;Acc:HGNC...</a> |
| <a href="#">1277</a>     | <a href="#">COL1A1</a>  | <a href="#">collagen type I alpha 1 chain [Source:HGNC ...</a> |
| <a href="#">1278</a>     | <a href="#">COL1A2</a>  | <a href="#">collagen type I alpha 2 chain [Source:HGNC ...</a> |
| <a href="#">1280</a>     | <a href="#">COL2A1</a>  | <a href="#">collagen type II alpha 1 chain [Source:HGNC...</a> |
| <a href="#">1281</a>     | <a href="#">COL3A1</a>  | <a href="#">collagen type III alpha 1 chain [Source:HGN...</a> |
| <a href="#">1282</a>     | <a href="#">COL4A1</a>  | <a href="#">collagen type IV alpha 1 chain [Source:HGNC...</a> |
| <a href="#">1284</a>     | <a href="#">COL4A2</a>  | <a href="#">collagen type IV alpha 2 chain [Source:HGNC...</a> |
| <a href="#">1286</a>     | <a href="#">COL4A4</a>  | <a href="#">collagen type IV alpha 4 chain [Source:HGNC...</a> |
| <a href="#">1288</a>     | <a href="#">COL4A6</a>  | <a href="#">collagen type IV alpha 6 chain [Source:HGNC...</a> |
| <a href="#">1289</a>     | <a href="#">COL5A1</a>  | <a href="#">collagen type V alpha 1 chain [Source:HGNC ...</a> |
| <a href="#">1290</a>     | <a href="#">COL5A2</a>  | <a href="#">collagen type V alpha 2 chain [Source:HGNC ...</a> |
| <a href="#">1291</a>     | <a href="#">COL6A1</a>  | <a href="#">collagen type VI alpha 1 chain [Source:HGNC...</a> |
| <a href="#">1292</a>     | <a href="#">COL6A2</a>  | <a href="#">collagen type VI alpha 2 chain [Source:HGNC...</a> |
| <a href="#">1293</a>     | <a href="#">COL6A3</a>  | <a href="#">collagen type VI alpha 3 chain [Source:HGNC...</a> |
| <a href="#">1301</a>     | <a href="#">COL11A1</a> | <a href="#">collagen type XI alpha 1 chain [Source:HGNC...</a> |
| <a href="#">1302</a>     | <a href="#">COL11A2</a> | <a href="#">collagen type XI alpha 2 chain [Source:HGNC...</a> |
| <a href="#">1311</a>     | <a href="#">COMP</a>    | <a href="#">cartilage oligomeric matrix protein [Source...</a> |
| <a href="#">131873</a>   | <a href="#">COL6A6</a>  | <a href="#">collagen type VI alpha 6 chain [Source:HGNC...</a> |
| <a href="#">1605</a>     | <a href="#">DAG1</a>    | <a href="#">dystroglycan 1 [Source:HGNC Symbol;Acc:HGNC...</a> |
| <a href="#">22798</a>    | <a href="#">LAMB4</a>   | <a href="#">laminin subunit beta 4 [Source:HGNC Symbol;...</a> |
| <a href="#">22801</a>    | <a href="#">ITGA11</a>  | <a href="#">integrin subunit alpha 11 [Source:HGNC Symb...</a> |
| <a href="#">22987</a>    | <a href="#">SV2C</a>    | <a href="#">synaptic vesicle glycoprotein 2C [Source:HG...</a> |
| <a href="#">2335</a>     | <a href="#">FN1</a>     | <a href="#">fibronectin 1 [Source:HGNC Symbol;Acc:HGNC:...</a> |
| <a href="#">2811</a>     | <a href="#">GP1BA</a>   | <a href="#">glycoprotein Ib platelet subunit alpha [Sou...</a> |
| <a href="#">2812</a>     | <a href="#">GP1BB</a>   | <a href="#">glycoprotein Ib platelet subunit beta [Sour...</a> |
| <a href="#">2814</a>     | <a href="#">GP5</a>     | <a href="#">glycoprotein V platelet [Source:HGNC Symbol...</a> |
| <a href="#">2815</a>     | <a href="#">GP9</a>     | <a href="#">glycoprotein IX platelet [Source:HGNC Symbo...</a> |

|                        |                        |                                                |
|------------------------|------------------------|------------------------------------------------|
| <a href="#">284217</a> | <a href="#">LAMA1</a>  | laminin subunit alpha 1 [Source:HGNC Symbol... |
| <a href="#">3161</a>   | <a href="#">HMMR</a>   | hyaluronan mediated motility receptor [Sour... |
| <a href="#">3339</a>   | <a href="#">HSPG2</a>  | heparan sulfate proteoglycan 2 [Source:HGNC... |
| <a href="#">3371</a>   | <a href="#">TNC</a>    | tenascin C [Source:HGNC Symbol;Acc:HGNC:5318]  |
| <a href="#">3381</a>   | <a href="#">IBSP</a>   | integrin binding sialoprotein [Source:HGNC ... |
| <a href="#">3655</a>   | <a href="#">ITGA6</a>  | integrin subunit alpha 6 [Source:HGNC Symbo... |
| <a href="#">3672</a>   | <a href="#">ITGA1</a>  | integrin subunit alpha 1 [Source:HGNC Symbo... |
| <a href="#">3673</a>   | <a href="#">ITGA2</a>  | integrin subunit alpha 2 [Source:HGNC Symbo... |
| <a href="#">3674</a>   | <a href="#">ITGA2B</a> | integrin subunit alpha 2b [Source:HGNC Symb... |
| <a href="#">3675</a>   | <a href="#">ITGA3</a>  | integrin subunit alpha 3 [Source:HGNC Symbo... |
| <a href="#">3676</a>   | <a href="#">ITGA4</a>  | integrin subunit alpha 4 [Source:HGNC Symbo... |
| <a href="#">3678</a>   | <a href="#">ITGA5</a>  | integrin subunit alpha 5 [Source:HGNC Symbo... |
| <a href="#">3679</a>   | <a href="#">ITGA7</a>  | integrin subunit alpha 7 [Source:HGNC Symbo... |
| <a href="#">3680</a>   | <a href="#">ITGA9</a>  | integrin subunit alpha 9 [Source:HGNC Symbo... |
| <a href="#">3685</a>   | <a href="#">ITGAV</a>  | integrin subunit alpha V [Source:HGNC Symbo... |
| <a href="#">3688</a>   | <a href="#">ITGB1</a>  | integrin subunit beta 1 [Source:HGNC Symbol... |
| <a href="#">3690</a>   | <a href="#">ITGB3</a>  | integrin subunit beta 3 [Source:HGNC Symbol... |
| <a href="#">3691</a>   | <a href="#">ITGB4</a>  | integrin subunit beta 4 [Source:HGNC Symbol... |
| <a href="#">3693</a>   | <a href="#">ITGB5</a>  | integrin subunit beta 5 [Source:HGNC Symbol... |
| <a href="#">3694</a>   | <a href="#">ITGB6</a>  | integrin subunit beta 6 [Source:HGNC Symbol... |
| <a href="#">3695</a>   | <a href="#">ITGB7</a>  | integrin subunit beta 7 [Source:HGNC Symbol... |
| <a href="#">3696</a>   | <a href="#">ITGB8</a>  | integrin subunit beta 8 [Source:HGNC Symbol... |
| <a href="#">375790</a> | <a href="#">AGRN</a>   | agrin [Source:HGNC Symbol;Acc:HGNC:329]        |
| <a href="#">3908</a>   | <a href="#">LAMA2</a>  | laminin subunit alpha 2 [Source:HGNC Symbol... |
| <a href="#">3909</a>   | <a href="#">LAMA3</a>  | laminin subunit alpha 3 [Source:HGNC Symbol... |
| <a href="#">3910</a>   | <a href="#">LAMA4</a>  | laminin subunit alpha 4 [Source:HGNC Symbol... |
| <a href="#">3911</a>   | <a href="#">LAMA5</a>  | laminin subunit alpha 5 [Source:HGNC Symbol... |
| <a href="#">3912</a>   | <a href="#">LAMB1</a>  | laminin subunit beta 1 [Source:HGNC Symbol;... |
| <a href="#">3913</a>   | <a href="#">LAMB2</a>  | laminin subunit beta 2 [Source:HGNC Symbol;... |
| <a href="#">3914</a>   | <a href="#">LAMB3</a>  | laminin subunit beta 3 [Source:HGNC Symbol;... |
| <a href="#">3915</a>   | <a href="#">LAMC1</a>  | laminin subunit gamma 1 [Source:HGNC Symbol... |
| <a href="#">3918</a>   | <a href="#">LAMC2</a>  | laminin subunit gamma 2 [Source:HGNC Symbol... |
| <a href="#">50509</a>  | <a href="#">COL5A3</a> | collagen type V alpha 3 chain [Source:HGNC ... |
| <a href="#">51206</a>  | <a href="#">GP6</a>    | glycoprotein VI platelet [Source:HGNC Symbo... |
| <a href="#">5649</a>   | <a href="#">RELN</a>   | reelin [Source:HGNC Symbol;Acc:HGNC:9957]      |
| <a href="#">6382</a>   | <a href="#">SDC1</a>   | syndecan 1 [Source:HGNC Symbol;Acc:HGNC:10658] |
| <a href="#">6383</a>   | <a href="#">SDC2</a>   | syndecan 2 [Source:HGNC Symbol;Acc:HGNC:10659] |
| <a href="#">6385</a>   | <a href="#">SDC4</a>   | syndecan 4 [Source:HGNC Symbol;Acc:HGNC:10661] |
| <a href="#">63923</a>  | <a href="#">TNN</a>    | tenascin N [Source:HGNC Symbol;Acc:HGNC:22942] |
| <a href="#">6696</a>   | <a href="#">SPP1</a>   | secreted phosphoprotein 1 [Source:HGNC Symb... |
| <a href="#">7057</a>   | <a href="#">THBS1</a>  | thrombospondin 1 [Source:HGNC Symbol;Acc:HG... |
| <a href="#">7058</a>   | <a href="#">THBS2</a>  | thrombospondin 2 [Source:HGNC Symbol;Acc:HG... |
| <a href="#">7059</a>   | <a href="#">THBS3</a>  | thrombospondin 3 [Source:HGNC Symbol;Acc:HG... |
| <a href="#">7060</a>   | <a href="#">THBS4</a>  | thrombospondin 4 [Source:HGNC Symbol;Acc:HG... |
| <a href="#">7143</a>   | <a href="#">TNR</a>    | tenascin R [Source:HGNC Symbol;Acc:HGNC:11953] |
| <a href="#">7148</a>   | <a href="#">TNXB</a>   | tenascin XB [Source:HGNC Symbol;Acc:HGNC:11... |

|                      |                        |                                                |
|----------------------|------------------------|------------------------------------------------|
| <a href="#">7448</a> | <a href="#">VTN</a>    | vitronectin [Source:HGNC Symbol;Acc:HGNC:12... |
| <a href="#">7450</a> | <a href="#">VWF</a>    | von Willebrand factor [Source:HGNC Symbol;A... |
| <a href="#">8515</a> | <a href="#">ITGA10</a> | integrin subunit alpha 10 [Source:HGNC Symb... |
| <a href="#">8516</a> | <a href="#">ITGA8</a>  | integrin subunit alpha 8 [Source:HGNC Symbo... |
| <a href="#">948</a>  | <a href="#">CD36</a>   | CD36 molecule [Source:HGNC Symbol;Acc:HGNC:... |
| <a href="#">960</a>  | <a href="#">CD44</a>   | CD44 molecule (Indian blood group) [Source:... |
| <a href="#">961</a>  | <a href="#">CD47</a>   | CD47 molecule [Source:HGNC Symbol;Acc:HGNC:... |
| <a href="#">9672</a> | <a href="#">SDC3</a>   | syndecan 3 [Source:HGNC Symbol;Acc:HGNC:10660] |
| <a href="#">9899</a> | <a href="#">SV2B</a>   | synaptic vesicle glycoprotein 2B [Source:HG... |
| <a href="#">9900</a> | <a href="#">SV2A</a>   | synaptic vesicle glycoprotein 2A [Source:HG... |

### S3H - Regulation of actin cytoskeleton

[https://www.gsea-msigdb.org/gsea/msigdb/human/geneset/KEGG\\_REGULATION\\_OF\\_ACTIN\\_CYTOSKELETON.html](https://www.gsea-msigdb.org/gsea/msigdb/human/geneset/KEGG_REGULATION_OF_ACTIN_CYTOSKELETON.html)  
(213 genes)

| NCBI (Entrez)<br>Gene Id | Gene<br>Symbol         | Gene Description                              |
|--------------------------|------------------------|-----------------------------------------------|
| <a href="#">10092</a>    | <a href="#">ARPC5</a>  | actin related protein 2/3 complex subunit ... |
| <a href="#">10093</a>    | <a href="#">ARPC4</a>  | actin related protein 2/3 complex subunit ... |
| <a href="#">10094</a>    | <a href="#">ARPC3</a>  | actin related protein 2/3 complex subunit ... |
| <a href="#">10095</a>    | <a href="#">ARPC1B</a> | actin related protein 2/3 complex subunit ... |
| <a href="#">10109</a>    | <a href="#">ARPC2</a>  | actin related protein 2/3 complex subunit ... |
| <a href="#">10152</a>    | <a href="#">ABI2</a>   | abl interactor 2 [Source:HGNC Symbol;Acc:H... |
| <a href="#">10163</a>    | <a href="#">WASF2</a>  | WASP family member 2 [Source:HGNC Symbol;A... |
| <a href="#">10297</a>    | <a href="#">APC2</a>   | APC regulator of WNT signaling pathway 2 [... |
| <a href="#">10298</a>    | <a href="#">PAK4</a>   | p21 (RAC1) activated kinase 4 [Source:HGNC... |
| <a href="#">103910</a>   | <a href="#">MYL12B</a> | myosin light chain 12B [Source:HGNC Symbol... |
| <a href="#">10398</a>    | <a href="#">MYL9</a>   | myosin light chain 9 [Source:HGNC Symbol;A... |
| <a href="#">10451</a>    | <a href="#">VAV3</a>   | vav guanine nucleotide exchange factor 3 [... |
| <a href="#">10458</a>    | <a href="#">BAIAP2</a> | BAR/IMD domain containing adaptor protein ... |
| <a href="#">10552</a>    | <a href="#">ARPC1A</a> | actin related protein 2/3 complex subunit ... |
| <a href="#">10627</a>    | <a href="#">MYL12A</a> | myosin light chain 12A [Source:HGNC Symbol... |
| <a href="#">10672</a>    | <a href="#">GNA13</a>  | G protein subunit alpha 13 [Source:HGNC Sy... |
| <a href="#">1072</a>     | <a href="#">CFL1</a>   | cofilin 1 [Source:HGNC Symbol;Acc:HGNC:1874]  |
| <a href="#">1073</a>     | <a href="#">CFL2</a>   | cofilin 2 [Source:HGNC Symbol;Acc:HGNC:1875]  |
| <a href="#">10787</a>    | <a href="#">NCKAP1</a> | NCK associated protein 1 [Source:HGNC Symb... |
| <a href="#">10788</a>    | <a href="#">IQGAP2</a> | IQ motif containing GTPase activating prot... |
| <a href="#">1128</a>     | <a href="#">CHRM1</a>  | cholinergic receptor muscarinic 1 [Source:... |
| <a href="#">1129</a>     | <a href="#">CHRM2</a>  | cholinergic receptor muscarinic 2 [Source:... |
| <a href="#">1131</a>     | <a href="#">CHRM3</a>  | cholinergic receptor muscarinic 3 [Source:... |
| <a href="#">1132</a>     | <a href="#">CHRM4</a>  | cholinergic receptor muscarinic 4 [Source:... |
| <a href="#">1133</a>     | <a href="#">CHRM5</a>  | cholinergic receptor muscarinic 5 [Source:... |
| <a href="#">128239</a>   | <a href="#">IQGAP3</a> | IQ motif containing GTPase activating prot... |
| <a href="#">1398</a>     | <a href="#">CRK</a>    | CRK proto-oncogene, adaptor protein [Sourc... |
| <a href="#">1399</a>     | <a href="#">CRKL</a>   | CRK like proto-oncogene, adaptor protein [... |

|        |          |                                               |
|--------|----------|-----------------------------------------------|
| 1445   | CSK      | C-terminal Src kinase [Source:HGNC Symbol;... |
| 1729   | DIAPH1   | diaphanous related formin 1 [Source:HGNC S... |
| 1730   | DIAPH2   | diaphanous related formin 2 [Source:HGNC S... |
| 1793   | DOCK1    | dedicator of cytokinesis 1 [Source:HGNC Sy... |
| 1950   | EGF      | epidermal growth factor [Source:HGNC Symbo... |
| 1956   | EGFR     | epidermal growth factor receptor [Source:H... |
| 200576 | PIKFYVE  | phosphoinositide kinase, FYVE-type zinc fi... |
| 2147   | F2       | coagulation factor II, thrombin [Source:HG... |
| 2149   | F2R      | coagulation factor II thrombin receptor [S... |
| 2245   | FGD1     | FYVE, RhoGEF and PH domain containing 1 [S... |
| 2246   | FGF1     | fibroblast growth factor 1 [Source:HGNC Sy... |
| 2247   | FGF2     | fibroblast growth factor 2 [Source:HGNC Sy... |
| 2248   | FGF3     | fibroblast growth factor 3 [Source:HGNC Sy... |
| 2249   | FGF4     | fibroblast growth factor 4 [Source:HGNC Sy... |
| 2250   | FGF5     | fibroblast growth factor 5 [Source:HGNC Sy... |
| 2251   | FGF6     | fibroblast growth factor 6 [Source:HGNC Sy... |
| 2252   | FGF7     | fibroblast growth factor 7 [Source:HGNC Sy... |
| 2253   | FGF8     | fibroblast growth factor 8 [Source:HGNC Sy... |
| 2254   | FGF9     | fibroblast growth factor 9 [Source:HGNC Sy... |
| 2255   | FGF10    | fibroblast growth factor 10 [Source:HGNC S... |
| 2256   | FGF11    | fibroblast growth factor 11 [Source:HGNC S... |
| 2257   | FGF12    | fibroblast growth factor 12 [Source:HGNC S... |
| 2258   | FGF13    | fibroblast growth factor 13 [Source:HGNC S... |
| 2259   | FGF14    | fibroblast growth factor 14 [Source:HGNC S... |
| 2260   | FGFR1    | fibroblast growth factor receptor 1 [Sourc... |
| 2261   | FGFR3    | fibroblast growth factor receptor 3 [Sourc... |
| 2263   | FGFR2    | fibroblast growth factor receptor 2 [Sourc... |
| 2264   | FGFR4    | fibroblast growth factor receptor 4 [Sourc... |
| 22800  | RRAS2    | RAS related 2 [Source:HGNC Symbol;Acc:HGNC... |
| 22801  | ITGA11   | integrin subunit alpha 11 [Source:HGNC Sym... |
| 22808  | MRAS     | muscle RAS oncogene homolog [Source:HGNC S... |
| 23191  | CYFIP1   | cytoplasmic FMR1 interacting protein 1 [So... |
| 2335   | FN1      | fibronectin 1 [Source:HGNC Symbol;Acc:HGNC... |
| 23365  | ARHGEF12 | Rho guanine nucleotide exchange factor 12 ... |
| 23396  | PIP5K1C  | phosphatidylinositol-4-phosphate 5-kinase ... |
| 23533  | PIK3R5   | phosphoinositide-3-kinase regulatory subun... |
| 26230  | TIAM2    | TIAM Rac1 associated GEF 2 [Source:HGNC Sy... |
| 26281  | FGF20    | fibroblast growth factor 20 [Source:HGNC S... |
| 26291  | FGF21    | fibroblast growth factor 21 [Source:HGNC S... |
| 26999  | CYFIP2   | cytoplasmic FMR1 interacting protein 2 [So... |
| 27006  | FGF22    | fibroblast growth factor 22 [Source:HGNC S... |
| 2768   | GNA12    | G protein subunit alpha 12 [Source:HGNC Sy... |
| 28964  | GIT1     | GIT ArfGAP 1 [Source:HGNC Symbol;Acc:HGNC:... |
| 2909   | ARHGAP35 | Rho GTPase activating protein 35 [Source:H... |
| 2934   | GSN      | gelsolin [Source:HGNC Symbol;Acc:HGNC:4620]   |
| 29895  | MYLPF    | myosin light chain, phosphorylatable, fast... |



|        |          |                                               |
|--------|----------|-----------------------------------------------|
| 3071   | NCKAP1L  | NCK associated protein 1 like [Source:HGNC... |
| 324    | APC      | APC regulator of WNT signaling pathway [So... |
| 3265   | HRAS     | HRas proto-oncogene, GTPase [Source:HGNC S... |
| 345456 | PFN3     | profilin 3 [Source:HGNC Symbol;Acc:HGNC:18... |
| 3630   | INS      | insulin [Source:HGNC Symbol;Acc:HGNC:6081]    |
| 3645   | INSRR    | insulin receptor related receptor [Source:... |
| 3655   | ITGA6    | integrin subunit alpha 6 [Source:HGNC Symb... |
| 3672   | ITGA1    | integrin subunit alpha 1 [Source:HGNC Symb... |
| 3673   | ITGA2    | integrin subunit alpha 2 [Source:HGNC Symb... |
| 3674   | ITGA2B   | integrin subunit alpha 2b [Source:HGNC Sym... |
| 3675   | ITGA3    | integrin subunit alpha 3 [Source:HGNC Symb... |
| 3676   | ITGA4    | integrin subunit alpha 4 [Source:HGNC Symb... |
| 3678   | ITGA5    | integrin subunit alpha 5 [Source:HGNC Symb... |
| 3679   | ITGA7    | integrin subunit alpha 7 [Source:HGNC Symb... |
| 3680   | ITGA9    | integrin subunit alpha 9 [Source:HGNC Symb... |
| 3681   | ITGAD    | integrin subunit alpha D [Source:HGNC Symb... |
| 3682   | ITGAE    | integrin subunit alpha E [Source:HGNC Symb... |
| 3683   | ITGAL    | integrin subunit alpha L [Source:HGNC Symb... |
| 3684   | ITGAM    | integrin subunit alpha M [Source:HGNC Symb... |
| 3685   | ITGAV    | integrin subunit alpha V [Source:HGNC Symb... |
| 3687   | ITGAX    | integrin subunit alpha X [Source:HGNC Symb... |
| 3688   | ITGB1    | integrin subunit beta 1 [Source:HGNC Symbo... |
| 3689   | ITGB2    | integrin subunit beta 2 [Source:HGNC Symbo... |
| 369    | ARAF     | A-Raf proto-oncogene, serine/threonine kin... |
| 3690   | ITGB3    | integrin subunit beta 3 [Source:HGNC Symbo... |
| 3691   | ITGB4    | integrin subunit beta 4 [Source:HGNC Symbo... |
| 3693   | ITGB5    | integrin subunit beta 5 [Source:HGNC Symbo... |
| 3694   | ITGB6    | integrin subunit beta 6 [Source:HGNC Symbo... |
| 3695   | ITGB7    | integrin subunit beta 7 [Source:HGNC Symbo... |
| 3696   | ITGB8    | integrin subunit beta 8 [Source:HGNC Symbo... |
| 375189 | PFN4     | profilin family member 4 [Source:HGNC Symb... |
| 3845   | KRAS     | KRAS proto-oncogene, GTPase [Source:HGNC S... |
| 387    | RHOA     | ras homolog family member A [Source:HGNC S... |
| 3984   | LIMK1    | LIM domain kinase 1 [Source:HGNC Symbol;Ac... |
| 3985   | LIMK2    | LIM domain kinase 2 [Source:HGNC Symbol;Ac... |
| 4342   | MOS      | MOS proto-oncogene, serine/threonine kinas... |
| 4478   | MSN      | moesin [Source:HGNC Symbol;Acc:HGNC:7373]     |
| 4627   | MYH9     | myosin heavy chain 9 [Source:HGNC Symbol;A... |
| 4628   | MYH10    | myosin heavy chain 10 [Source:HGNC Symbol;... |
| 4633   | MYL2     | myosin light chain 2 [Source:HGNC Symbol;A... |
| 4636   | MYL5     | myosin light chain 5 [Source:HGNC Symbol;A... |
| 4638   | MYLK     | myosin light chain kinase [Source:HGNC Sym... |
| 4659   | PPP1R12A | protein phosphatase 1 regulatory subunit 1... |
| 4893   | NRAS     | NRAS proto-oncogene, GTPase [Source:HGNC S... |
| 5058   | PAK1     | p21 (RAC1) activated kinase 1 [Source:HGNC... |
| 5062   | PAK2     | p21 (RAC1) activated kinase 2 [Source:HGNC... |



|       |         |                                               |
|-------|---------|-----------------------------------------------|
| 5063  | PAK3    | p21 (RAC1) activated kinase 3 [Source:HGNC... |
| 50649 | ARHGEF4 | Rho guanine nucleotide exchange factor 4 [... |
| 5154  | PDGFA   | platelet derived growth factor subunit A [... |
| 5155  | PDGFB   | platelet derived growth factor subunit B [... |
| 5156  | PDGFRA  | platelet derived growth factor receptor al... |
| 5159  | PDGFRB  | platelet derived growth factor receptor be... |
| 5216  | PFN1    | profilin 1 [Source:HGNC Symbol;Acc:HGNC:8881] |
| 5217  | PFN2    | profilin 2 [Source:HGNC Symbol;Acc:HGNC:8882] |
| 5290  | PIK3CA  | phosphatidylinositol-4,5-bisphosphate 3-ki... |
| 5291  | PIK3CB  | phosphatidylinositol-4,5-bisphosphate 3-ki... |
| 5293  | PIK3CD  | phosphatidylinositol-4,5-bisphosphate 3-ki... |
| 5294  | PIK3CG  | phosphatidylinositol-4,5-bisphosphate 3-ki... |
| 5295  | PIK3R1  | phosphoinositide-3-kinase regulatory subun... |
| 5296  | PIK3R2  | phosphoinositide-3-kinase regulatory subun... |
| 5305  | PIP4K2A | phosphatidylinositol-5-phosphate 4-kinase ... |
| 54434 | SSH1    | slingshot protein phosphatase 1 [Source:HG... |
| 54961 | SSH3    | slingshot protein phosphatase 3 [Source:HG... |
| 5499  | PPP1CA  | protein phosphatase 1 catalytic subunit al... |
| 5500  | PPP1CB  | protein phosphatase 1 catalytic subunit be... |
| 5501  | PPP1CC  | protein phosphatase 1 catalytic subunit ga... |
| 55740 | ENAH    | ENAH actin regulator [Source:HGNC Symbol;A... |
| 55845 | BRK1    | BRICK1 subunit of SCAR/WAVE actin nucleati... |
| 5594  | MAPK1   | mitogen-activated protein kinase 1 [Source... |
| 5595  | MAPK3   | mitogen-activated protein kinase 3 [Source... |
| 55970 | GNG12   | G protein subunit gamma 12 [Source:HGNC Sy... |
| 56034 | PDGFC   | platelet derived growth factor C [Source:H... |
| 5604  | MAP2K1  | mitogen-activated protein kinase kinase 1 ... |
| 5605  | MAP2K2  | mitogen-activated protein kinase kinase 2 ... |
| 56924 | PAK6    | p21 (RAC1) activated kinase 6 [Source:HGNC... |
| 57144 | PAK5    | p21 (RAC1) activated kinase 5 [Source:HGNC... |
| 5747  | PTK2    | protein tyrosine kinase 2 [Source:HGNC Sym... |
| 5829  | PXN     | paxillin [Source:HGNC Symbol;Acc:HGNC:9718]   |
| 58498 | MYL7    | myosin light chain 7 [Source:HGNC Symbol;A... |
| 5879  | RAC1    | Rac family small GTPase 1 [Source:HGNC Sym... |
| 5880  | RAC2    | Rac family small GTPase 2 [Source:HGNC Sym... |
| 5881  | RAC3    | Rac family small GTPase 3 [Source:HGNC Sym... |
| 5894  | RAF1    | Raf-1 proto-oncogene, serine/threonine kin... |
| 5962  | RDX     | radixin [Source:HGNC Symbol;Acc:HGNC:9944]    |
| 60    | ACTB    | actin beta [Source:HGNC Symbol;Acc:HGNC:132]  |
| 6093  | ROCK1   | Rho associated coiled-coil containing prot... |
| 623   | BDKRB1  | bradykinin receptor B1 [Source:HGNC Symbol... |
| 6237  | RRAS    | RAS related [Source:HGNC Symbol;Acc:HGNC:1... |
| 624   | BDKRB2  | bradykinin receptor B2 [Source:HGNC Symbol... |
| 6548  | SLC9A1  | solute carrier family 9 member A1 [Source:... |
| 6654  | SOS1    | SOS Ras/Rac guanine nucleotide exchange fa... |
| 6655  | SOS2    | SOS Ras/Rho guanine nucleotide exchange fa... |

|       |                          |                                               |
|-------|--------------------------|-----------------------------------------------|
| 673   | <a href="#">BRAF</a>     | B-Raf proto-oncogene, serine/threonine kin... |
| 7074  | <a href="#">TIAM1</a>    | TIAM Rac1 associated GEF 1 [Source:HGNC Sy... |
| 71    | <a href="#">ACTG1</a>    | actin gamma 1 [Source:HGNC Symbol;Acc:HGNC... |
| 7114  | <a href="#">TMSB4X</a>   | thymosin beta 4 X-linked [Source:HGNC Symb... |
| 7117  | <a href="#">TMSB4XP8</a> | TMSB4X pseudogene 8 [Source:HGNC Symbol;Ac... |
| 7409  | <a href="#">VAV1</a>     | vav guanine nucleotide exchange factor 1 [... |
| 7410  | <a href="#">VAV2</a>     | vav guanine nucleotide exchange factor 2 [... |
| 7414  | <a href="#">VCL</a>      | vinculin [Source:HGNC Symbol;Acc:HGNC:12665]  |
| 7430  | <a href="#">EZR</a>      | ezrin [Source:HGNC Symbol;Acc:HGNC:12691]     |
| 7454  | <a href="#">WAS</a>      | WASP actin nucleation promoting factor [So... |
| 79784 | <a href="#">MYH14</a>    | myosin heavy chain 14 [Source:HGNC Symbol;... |
| 79837 | <a href="#">PIP4K2C</a>  | phosphatidylinositol-5-phosphate 4-kinase ... |
| 80310 | <a href="#">PDGFD</a>    | platelet derived growth factor D [Source:H... |
| 8074  | <a href="#">FGF23</a>    | fibroblast growth factor 23 [Source:HGNC S... |
| 81    | <a href="#">ACTN4</a>    | actinin alpha 4 [Source:HGNC Symbol;Acc:HG... |
| 81624 | <a href="#">DIAPH3</a>   | diaphanous related formin 3 [Source:HGNC S... |
| 81873 | <a href="#">ARPC5L</a>   | actin related protein 2/3 complex subunit ... |
| 8394  | <a href="#">PIP5K1A</a>  | phosphatidylinositol-4-phosphate 5-kinase ... |
| 8395  | <a href="#">PIP5K1B</a>  | phosphatidylinositol-4-phosphate 5-kinase ... |
| 8396  | <a href="#">PIP4K2B</a>  | phosphatidylinositol-5-phosphate 4-kinase ... |
| 8503  | <a href="#">PIK3R3</a>   | phosphoinositide-3-kinase regulatory subun... |
| 8515  | <a href="#">ITGA10</a>   | integrin subunit alpha 10 [Source:HGNC Sym... |
| 8516  | <a href="#">ITGA8</a>    | integrin subunit alpha 8 [Source:HGNC Symb... |
| 85366 | <a href="#">MYLK2</a>    | myosin light chain kinase 2 [Source:HGNC S... |
| 85464 | <a href="#">SSH2</a>     | slingshot protein phosphatase 2 [Source:HG... |
| 85477 | <a href="#">SCIN</a>     | scinderin [Source:HGNC Symbol;Acc:HGNC:21695] |
| 87    | <a href="#">ACTN1</a>    | actinin alpha 1 [Source:HGNC Symbol;Acc:HG... |
| 88    | <a href="#">ACTN2</a>    | actinin alpha 2 [Source:HGNC Symbol;Acc:HG... |
| 8817  | <a href="#">FGF18</a>    | fibroblast growth factor 18 [Source:HGNC S... |
| 8822  | <a href="#">FGF17</a>    | fibroblast growth factor 17 [Source:HGNC S... |
| 8823  | <a href="#">FGF16</a>    | fibroblast growth factor 16 [Source:HGNC S... |
| 8826  | <a href="#">IQGAP1</a>   | IQ motif containing GTPase activating prot... |
| 8874  | <a href="#">ARHGEF7</a>  | Rho guanine nucleotide exchange factor 7 [... |
| 89    | <a href="#">ACTN3</a>    | actinin alpha 3 [Source:HGNC Symbol;Acc:HG... |
| 8936  | <a href="#">WASF1</a>    | WASP family member 1 [Source:HGNC Symbol;A... |
| 8976  | <a href="#">WASL</a>     | WASP like actin nucleation promoting facto... |
| 89846 | <a href="#">FGD3</a>     | FYVE, RhoGEF and PH domain containing 3 [S... |
| 9087  | <a href="#">TMSB4Y</a>   | thymosin beta 4 Y-linked [Source:HGNC Symb... |
| 9138  | <a href="#">ARHGEF1</a>  | Rho guanine nucleotide exchange factor 1 [... |
| 91807 | <a href="#">MYLK3</a>    | myosin light chain kinase 3 [Source:HGNC S... |
| 929   | <a href="#">CD14</a>     | CD14 molecule [Source:HGNC Symbol;Acc:HGNC... |
| 93408 | <a href="#">MYL10</a>    | myosin light chain 10 [Source:HGNC Symbol;... |
| 9459  | <a href="#">ARHGEF6</a>  | Rac/Cdc42 guanine nucleotide exchange fact... |
| 9475  | <a href="#">ROCK2</a>    | Rho associated coiled-coil containing prot... |
| 9564  | <a href="#">BCAR1</a>    | BCAR1 scaffold protein, Cas family member ... |
| 9965  | <a href="#">FGF19</a>    | fibroblast growth factor 19 [Source:HGNC S... |

|     |       |                                               |
|-----|-------|-----------------------------------------------|
| 998 | CDC42 | cell division cycle 42 [Source:HGNC Symbol... |
|-----|-------|-----------------------------------------------|

### S3I - Hedgehog signaling

[https://www.gsea-msigdb.org/gsea/msigdb/human/geneset/KEGG\\_HEDGEHOG\\_SIGNALING\\_PATHWAY.html](https://www.gsea-msigdb.org/gsea/msigdb/human/geneset/KEGG_HEDGEHOG_SIGNALING_PATHWAY.html) (56 genes)

| NCBI (Entrez)<br>Gene Id | Gene<br>Symbol | Gene Description                              |
|--------------------------|----------------|-----------------------------------------------|
| 122011                   | CSNK1A1L       | casein kinase 1 alpha 1 like [Source:HGNC ... |
| 1452                     | CSNK1A1        | casein kinase 1 alpha 1 [Source:HGNC Symbo... |
| 1453                     | CSNK1D         | casein kinase 1 delta [Source:HGNC Symbol;... |
| 1454                     | CSNK1E         | casein kinase 1 epsilon [Source:HGNC Symbo... |
| 1455                     | CSNK1G2        | casein kinase 1 gamma 2 [Source:HGNC Symbo... |
| 1456                     | CSNK1G3        | casein kinase 1 gamma 3 [Source:HGNC Symbo... |
| 23291                    | FBXW11         | F-box and WD repeat domain containing 11 [... |
| 2619                     | GAS1           | growth arrest specific 1 [Source:HGNC Symb... |
| 27148                    | STK36          | serine/threonine kinase 36 [Source:HGNC Sy... |
| 2735                     | GLI1           | GLI family zinc finger 1 [Source:HGNC Symb... |
| 2736                     | GLI2           | GLI family zinc finger 2 [Source:HGNC Symb... |
| 2737                     | GLI3           | GLI family zinc finger 3 [Source:HGNC Symb... |
| 2932                     | GSK3B          | glycogen synthase kinase 3 beta [Source:HG... |
| 353500                   | BMP8A          | bone morphogenetic protein 8a [Source:HGNC... |
| 3549                     | IHH            | Indian hedgehog signaling molecule [Source... |
| 4036                     | LRP2           | LDL receptor related protein 2 [Source:HGN... |
| 50846                    | DHH            | desert hedgehog signaling molecule [Source... |
| 51384                    | WNT16          | Wnt family member 16 [Source:HGNC Symbol;A... |
| 51684                    | SUFU           | SUFU negative regulator of hedgehog signal... |
| 51715                    | RAB23          | RAB23, member RAS oncogene family [Source:... |
| 53944                    | CSNK1G1        | casein kinase 1 gamma 1 [Source:HGNC Symbo... |
| 54361                    | WNT4           | Wnt family member 4 [Source:HGNC Symbol;Ac... |
| 5566                     | PRKACA         | protein kinase cAMP-activated catalytic su... |
| 5567                     | PRKACB         | protein kinase cAMP-activated catalytic su... |
| 5568                     | PRKACG         | protein kinase cAMP-activated catalytic su... |
| 5613                     | PRKX           | protein kinase X-linked [Source:HGNC Symbo... |
| 5727                     | PTCH1          | patched 1 [Source:HGNC Symbol;Acc:HGNC:9585]  |
| 64399                    | HHIP           | hedgehog interacting protein [Source:HGNC ... |
| 6469                     | SHH            | sonic hedgehog signaling molecule [Source:... |
| 650                      | BMP2           | bone morphogenetic protein 2 [Source:HGNC ... |
| 652                      | BMP4           | bone morphogenetic protein 4 [Source:HGNC ... |
| 653                      | BMP5           | bone morphogenetic protein 5 [Source:HGNC ... |
| 654                      | BMP6           | bone morphogenetic protein 6 [Source:HGNC ... |
| 655                      | BMP7           | bone morphogenetic protein 7 [Source:HGNC ... |
| 656                      | BMP8B          | bone morphogenetic protein 8b [Source:HGNC... |
| 6608                     | SMO            | smoothened, frizzled class receptor [Sourc... |
| 7471                     | WNT1           | Wnt family member 1 [Source:HGNC Symbol;Ac... |
| 7472                     | WNT2           | Wnt family member 2 [Source:HGNC Symbol;Ac... |

|       |        |                                               |
|-------|--------|-----------------------------------------------|
| 7473  | WNT3   | Wnt family member 3 [Source:HGNC Symbol;Ac... |
| 7474  | WNT5A  | Wnt family member 5A [Source:HGNC Symbol;A... |
| 7475  | WNT6   | Wnt family member 6 [Source:HGNC Symbol;Ac... |
| 7476  | WNT7A  | Wnt family member 7A [Source:HGNC Symbol;A... |
| 7477  | WNT7B  | Wnt family member 7B [Source:HGNC Symbol;A... |
| 7478  | WNT8A  | Wnt family member 8A [Source:HGNC Symbol;A... |
| 7479  | WNT8B  | Wnt family member 8B [Source:HGNC Symbol;A... |
| 7480  | WNT10B | Wnt family member 10B [Source:HGNC Symbol;... |
| 7481  | WNT11  | Wnt family member 11 [Source:HGNC Symbol;A... |
| 7482  | WNT2B  | Wnt family member 2B [Source:HGNC Symbol;A... |
| 7483  | WNT9A  | Wnt family member 9A [Source:HGNC Symbol;A... |
| 7484  | WNT9B  | Wnt family member 9B [Source:HGNC Symbol;A... |
| 7546  | ZIC2   | Zic family member 2 [Source:HGNC Symbol;Ac... |
| 80326 | WNT10A | Wnt family member 10A [Source:HGNC Symbol;... |
| 81029 | WNT5B  | Wnt family member 5B [Source:HGNC Symbol;A... |
| 8643  | PTCH2  | patched 2 [Source:HGNC Symbol;Acc:HGNC:9586]  |
| 8945  | BTRC   | beta-transducin repeat containing E3 ubiqu... |
| 89780 | WNT3A  | Wnt family member 3A [Source:HGNC Symbol;A... |

## **Introduction**

The evolutionary conserved *NEAT1-MALAT1* gene cluster encounters high interest in both cardiovascular medicine and oncology. In the cardiovascular field, we observed suppression of lncRNA *NEAT1* in circulating immune cells of post-myocardial infarction (MI) patients [1]. Mice lacking lncRNAs *NEAT1* [1] or *MALAT1* [2-4] displayed immune disturbances affecting monocyte-macrophage and T cell differentiation and rendering the immune system highly vulnerable to stress stimuli, thereby promoting the development of atherosclerosis [1, 2, 4-8]. Uncontrolled inflammation is also a key driver of multiple other diseases [1, 2, 9-19].

Here, we report biological functions of two tRNA-like transcripts from the *NEAT1-MALAT1* cluster (Fig. 1) and describe their deep impact upon innate immunity and macrophage functions. While we previously investigated mice deficient in the entire *NEAT1* or *MALAT1* locus, we now aimed to selectively disrupt only the tRNA-like transcript 'menRNA' arising from *NEAT1* [17, 20, 21], or 'mascRNA' arising from *MALAT1*. No biological function independent of its precursor *NEAT1* has been assigned to menRNA so far, while a few studies have addressed mascRNA. After a report that mascRNA is involved in cardiovascular innate immunity [3], Sun *et al.* conducted an in-depth study demonstrating that mascRNA differentially regulates TLR-induced proinflammatory and antiviral responses [22]. Lu *et al.* showed that mascRNA promotes global protein translation, uncovering another role of mascRNA that is independent of *MALAT1* [23].

The two closely neighbouring gene loci give rise to transcripts of vastly different size (*NEAT1*: 23kb MEN- $\beta$ , 3.7kb MEN- $\epsilon$ , 59nt 'menRNA'; *MALAT1*: 8.3 kb primary, 58nt 'mascRNA'), and traditional knockout methods are unsuitable to selectively inactivate one of the small transcripts only. Through CRISPR-Cas9 editing [24-27], we therefore developed human monocyte-macrophage cell lines with short deletions in the respective tRNA-encoding sequences to disrupt normal menRNA or mascRNA formation, respectively. These editing procedures occur outside of the primary transcript sequences required for regular formation of the triple-helix structures at their 3'-ends which support stabilization of the respective lncRNAs (Fig. 1AB). Our study may be considered extension of a previous pioneering study which has identified, for the first time, functional domains within MEN- $\beta$  through CRISPR-Cas9 based deletion mapping [17]. While covering the entire length of MEN- $\beta$ , that study has not reported on deletions downstream of the 3'-terminal A-rich motif essential for triple-helix formation and stabilization of MEN- $\beta$ . Our  $\Delta$ menRNA clone disrupts the menRNA sequence 21nt downstream of the A-rich motif, thus leaving triple helix formation and MEN- $\beta$  intact (Fig. 1C). Our CRISPR-Cas9-based editing of menRNA or mascRNA selectively prevented only the normal transcript folding and formation of mature menRNA or mascRNA, respectively. Unlike monocytes and macrophages in *NEAT1*<sup>-/-</sup> mice [1], CRISPR-Cas9-generated  $\Delta$ menRNA cells retained MEN- $\beta$  and MEN- $\epsilon$  expression (Fig. 1D). Similarly,  $\Delta$ mascRNA monocytes preserved expression of the long *MALAT1* precursor while mascRNA, normally highly enriched in this cell type, became ablated (Fig. 1E).

Beyond prior work documenting immune function of the *NEAT1-MALAT1* cluster, the current study identifies menRNA as a novel element of innate immunity impacting upon cytokine regulation, immune cell-endothelium interactions, angiogenesis, and monocyte-macrophage differentiation and functions. For mascRNA, impact upon cell-cell interactions and angiogenesis are described. These small transcript may be considered as prototypes of a new class of RNAs distinct from other small transcripts (miRNAs, siRNAs) by biosynthetic pathway and intracellular kinetics. From an evolutionary perspective, the *NEAT1-MALAT1* genomic region appears as archetype of a functionally highly integrated RNA processing system.

## **Results**

### ***Targeted deletion of tRNA-like transcripts from the NEAT1-MALAT1 cluster***

While previously investigated mice were deficient in the entire *NEAT1* or *MALAT1* locus [1, 2, 4], we here aimed to selectively disrupt only the novel 59-nt tRNA-like transcript 'menRNA' with so far unknown biological functions (Fig. 1A). Through CRISPR-Cas9 editing, we developed human THP-1 monocyte-macrophage cell lines

with deletions immediately downstream of the triple-helix ends of MEN- $\beta$  (Fig. 1AC) or *MALAT1* (Fig. 1B), respectively. All of these prevent normal transcript folding and formation of menRNA or mascRNA, respectively, as shown in detail in Fig. 1E.

We examined whether the absence of menRNA or mascRNA in  $\Delta$ menRNA or  $\Delta$ mascRNA monocytes affects, by some cytosolic-nuclear or other feedback mechanism, the cellular expression levels of the long precursors. Unlike monocytes/macrophages in *NEAT1*<sup>-/-</sup> [1] or *MALAT1*<sup>-/-</sup> [2] mice, the CRISPR/Cas9-generated  $\Delta$ menRNA monocytes/macrophages retained apparently normal MEN- $\beta$  and MEN- $\epsilon$  expression as assessed by RT-PCR (Fig. 1D). Similarly,  $\Delta$ mascRNA monocytes/macrophages preserved expression of the *MALAT1* precursor (Fig. 1D) although mascRNA, normally highly enriched in this cell type, became ablated (Fig. 1E).

As a consequence of its rapid turnover, the cellular steady-state level of menRNA is very low. Low menRNA abundance in immune cells is in sharp contrast to the enrichment of mascRNA in monocytes first described by our group [3]. In that former study we documented high efficacy of antisense oligonucleotides (ASOs) targeting the mascRNA sequence, regarding reduction of the mascRNA level in monocytes [3]. Similarly, in the present CRISPR-Cas9 study it was straightforward to confirm absence of mascRNA or mascRNA-homologous transcripts in  $\Delta$ mascRNA cells by Northern blot analysis (Fig. 1G).

Prove of efficacy and specificity of menRNA deletion was less straightforward due to its low abundance in organs and cell lines. Successful and precise disruption of the menRNA-forming sequence 3' of the triple-helix was proven by regular sequencing of the target region (Fig. 1D) in each of the  $\Delta$ menRNA clone passages used for the experiments in this project. Of note, this deletion remained stable over >30 passages, enabling conduction of a major series of experiments. On the other hand, proof of menRNA expression in wildtype THP-1 cells required Northern blot analysis with high RNA input loading and very long exposure times (Fig. 1F).

Conventionally, rescue experiments employing vector-mediated overexpression of menRNA in  $\Delta$ menRNA cells would be considered suitable to further prove specificity of cellular effects of menRNA deletion. We conducted "rescue" experiments with recombinant menRNA overexpression employing vectors as specified in Fig. 1H. We previously used and characterized these vectors for short hairpin RNA (shRNA) expression and RNA interference (RNAi) induction [28, 29]. The U6 promoter therein allows for efficient RNA polymerase III dependent expression of short transcripts without poly-A tail e.g. menRNA. Results of a short-term experiment with partial recovery of cytokine gene deregulations are shown in Fig. 4D. Of note, it was technically unfeasible to conduct long-term "rescue" in the experiments shown in Fig. 5-9, because recombinant menRNA levels decayed rapidly and repeat vector transduction was unpracticable in these complex long-term assays.

Beyond these technical issues, a principal problem of menRNA "rescue" arises from the fact that recombinant menRNA is generated by direct linear synthesis out of the vector upon its entry into the cytosol *via* endocytosis. In contrast, endogenous menRNA biosynthesis occurs through RNase P and Z cleavage out of the nuclear MEN- $\beta$  transcript, normally followed by 3'-terminal CCA and CCACCA addition [21, 30] with strong impact upon menRNA stability [30] and induction of the immune response [31]. As a side remark it may be noted that the menRNA is stabilized when expressed from the constitutive RNA polymerase III promoter in the vector, and that an additional CCA motif in the construct impairs its stability. In the particular case of menRNA we therefore consider clearcut "rescue" precisely recreating the wildtype situation in  $\Delta$ menRNA cells technically unfeasible.

Due to their known posttranscriptional mechanisms of action, neither ASOs nor siRNAs selectively interact only with the short menRNA or mascRNA sequences. Instead, they will also interact with these sequences when still embedded in the long precursors transcripts from *NEAT1* and *MALAT1* and may mediate their premature decay, making unequivocal distinction between consequences of menRNA/mascRNA ablation from those of *NEAT1*/*MALAT1* reduction [1, 2, 4] impossible. In the peculiar case of the high-turnover menRNA, the CRISPR-Cas9 deletion clone with its deletion at the DNA level is obviously a particularly useful highly specific and stable system for selective menRNA ablation and functional assignment of cellular functions to menRNA.

Regarding *in vivo* studies, any attempt to generate germ-line menRNA or mascRNA deficient animal models will be technically demanding and likely also display developmental/embryonic anomalies and disturbance of diverse somatic cells other than immune cells/monocytes. One would instead need mice with a monocyte-specific, adult-age inducible, selective knockout of the menRNA or mascRNA sequence only to resolve these issues. Beyond these technical challenges, there exists no murine homologue to human IL-8 which was, however, the

most strongly deregulated cytokine in circulating immune cells of post-MI patients [1]. As a first step, these ambiguities are avoided by CRISPR-mediated deletion in one specific cell type/line of human origin. We examined whether absence of menRNA in  $\Delta$ menRNA monocytes affects, by some cytosolic-nuclear feedback mechanism, the cellular expression level of *NEAT1*. Under the experimental conditions employed here, however, there was no change as detectable by RNA-sequencing (RNA-seq) and qRT-PCR

#### ***Defective innate immune sensing by $\Delta$ menRNA and $\Delta$ mascRNA cells***

RNA-seq was employed as genome-wide screening tool to detect any alterations in the protein-coding or noncoding transcriptome of wildtype vs.  $\Delta$ menRNA or  $\Delta$ mascRNA cells (Fig. 2). Based on the RNA-seq data, we subsequently investigated a large number of deregulated genes by qRT-PCR under different conditions (Fig. 3 to 9), in monocytes (Fig. 4 to 6) as well as the corresponding differentiated macrophage (Fig. 7-9) clones.

RNA-seq identified profound alterations in the baseline transcriptomes of  $\Delta$ menRNA and  $\Delta$ mascRNA monocytes. These are shown in Fig. 2AB as Gene set enrichment analysis (GSEA) plots. The Suppl. Tables S1/S2 provide FKPM details of this RNA-seq study for a large number of key deregulated transcripts. The rainbow heat maps in Fig. 3-5 and Fig. 8 are excerpts of functional gene groups relevant for the respective chapter (e.g. innate immune sensors in Fig. 3AB). GSEA identified immune response (red dots) and cell-cell interaction (green dots) associated biological processes enriched by genes deregulated in  $\Delta$ menRNA cells (Inset): primary immunodeficiency, cytokine-cytokine receptor interaction, JAK-STAT-signaling [32], hedgehog signaling [33, 34], focal adhesion, GAP junction, extracellular matrix receptor interaction, regulation of actin cytoskeleton.

A prominent finding was gross dysbalance between multiple innate immune sensors in  $\Delta$ menRNA monocytes (Fig. 3AB, Table S1A), including cytosolic NOD-like receptors NOD2 [35-42] and CIITA [43-45], NLR-class receptors NLRC3 [46-48], NLRC4 [48, 49] and MEFV [48, 50, 51], and membrane-bound Toll-like receptors (TLR1, TLR2, TLR7, TLR10). In the context of baseline induction of NOD2 and TLR2, it is notable that twist family bHLH transcription factor 2 (TWIST2) [52] was ~10-fold down in  $\Delta$ menRNA cells (Fig. 3GH), and loss of NLRC3 and TWIST2 expression in  $\Delta$ menRNA monocytes could not be rescued by LPS (Fig. 3E)(compare Fig. 6A).  $\Delta$ mascRNA monocytes displayed induction of interferon (IFN)-induced transmembrane (IFITM) proteins [53](Fig. 3C, Table S2A).

#### ***Transcription, translation, and epigenome level anomalies in defective monocytes***

Transcription and nuclear factors and epigenome modifiers (Fig. 3G-I, Tables S1B/S2B), as well as translation factors, ribosomal proteins and nucleic acid modifiers (Fig. 3K-M, Tables S1C/S2C) were deregulated in defective cells. At the transcriptional level, in addition to TWIST2, transcription factor (TF) GATA2 was ~4-fold induced and GATA6 ~20-fold suppressed [54] (Fig. 3DE), and NFATC2 [55] switched off in  $\Delta$ menRNA cells (Fig. 3G). Further TFs and epigenome modifiers turned into disequilibrium upon LPS challenge (Fig. 3H), among them histone deacetylases, lysine demethylases, and METTL methyltransferases [56]. At the level of translation, three initiation and elongation-related factors (EIF3CL, EEF1A2, CTIF) were induced while initiation factor EIF1AY [57, 58] and ribosomal protein RPS4Y1 were 33-fold and 45-fold, respectively, downregulated in  $\Delta$ menRNA cells (Fig. 3KL). Nucleic acid-modifying enzymes deregulated include DEAD-box helicase DDX3Y (333-fold downregulated), and NOP2/Sun methyltransferase NSUN7 [59-65] undetectable in controls but robustly expressed in  $\Delta$ menRNA cells (FKPM 22)(Fig. 3K, Table S1C). At the level of tRNAs, genomically or mitochondrially encoded tRNAs [61, 63] and tRNA methyltransferases turned into imbalance. In  $\Delta$ mascRNA cells (Fig. 3M), cytosolic nucleotidase NT5C1A [66] dephosphorylating 5' and 2'(3')-phosphates of deoxyribonucleotides with broad substrate specificity, is suppressed. Furthermore, RNA-seq identified deregulation of long noncoding RNAs (lncRNAs) and antisense (AS) RNAs in  $\Delta$ menRNA and  $\Delta$ mascRNA monocytes (Tables S1D/2D). Thus,  $\Delta$ menRNA cells showed ~7-fold downregulation of a recently discovered novel transcript designated 'MARCKS cis-regulating lncRNA promoter of cytokines and inflammation' or 'regulator of cytokines and inflammation' (ROCKI) (Fig. 4DE, Table S1D/S2D). This transcript of particular interest was identified by Zhang *et al.* [67-70] by genome-wide scan of macrophages for pairs of cis-acting lncRNAs and protein-coding genes involved in innate immunity.

### ***Excessive inflammatory cytokine production by $\Delta$ menRNA and $\Delta$ mascrRNA cells***

We found massively elevated basal expression and secretion of IL-8, TNF, and IL1B in  $\Delta$ menRNA monocytes (Fig. 4AB).  $\Delta$ mascrRNA monocytes displayed exaggerated LPS induction of IL1A, IL1B, IL10, and ISG15 (Fig. 4C). Conversely,  $\Delta$ menRNA but not  $\Delta$ mascrRNA macrophages displayed blunted NOS2 expression and impaired ROS production upon LPS or H<sub>2</sub>O<sub>2</sub> challenge (Fig. 7C). There were anomalies of further interleukin (IL)/receptor and TNF cytokine/receptor systems (Fig. 4E-G, Tables S1E/S2E). Receptor IL4R was ~7-fold and M2 macrophage polarization regulator IL4I1 [71-76] ~11-fold down in  $\Delta$ menRNA monocytes (Fig. 4EF). Even more pronounced was disequilibrium within the IL18 system [77, 78].. Receptor IL18R1 and IL18 receptor accessory protein (IL18RAP) were switched off. IL2 receptor IL2R- $\beta$  (IL2RB) was ~52-fold and IL2R- $\gamma$  (IL2Rc) ~13-fold suppressed [79-85]. IL1 receptor antagonist (IL1RN) was ~12-fold and IL1 receptor associated kinase 2 (IRAK2) ~8-fold down in  $\Delta$ menRNA cells. Among ligands, IL16 remained ~18-fold suppressed even after LPS stimulation. Partial “rescue” of cytokine control in  $\Delta$ menRNA monocytes was obtained by recombinant human menRNA (Fig. 4D).

‘Regulator of cytokines and inflammation’ (ROCKI) was ~7-fold and SLFN5, a transcriptional co-repressor of interferon (IFN) responses and antiviral restriction factor [86-89], ~10-fold suppressed in  $\Delta$ menRNA monocytes (Fig. 4EF) while another member (SLFN12L) of the SLFN family of IFN-induced genes was ~26-fold up. Several ADAM metallopeptidases (Tables S1E/S2E) as well as cluster of differentiation (CD) and other leukocyte marker proteins [90-99] (Tables S1F/S2F) were likewise deregulated and some of them switched off in  $\Delta$ menRNA (Fig. 4EF) or  $\Delta$ mascrRNA cells (Fig. 4G).

### ***Disturbed growth pattern and endothelium interactions of $\Delta$ menRNA monocytes***

At the cellular level,  $\Delta$ menRNA monocytes displayed an anomalous growth pattern with spontaneous cell cluster formation in liquid culture (Fig. 5A), and defective endothelial adhesion under multiple flow conditions (Fig. 5B). The LPS-dependent induction of cell adhesion molecules (ICAM1, VCAM1) was defective in  $\Delta$ menRNA monocytes (Fig. 5C), contrasting with exacerbated induction in  $\Delta$ mascrRNA monocytes.  $\Delta$ menRNA monocyte-conditioned medium altered expression of multiple gene in HAEC monolayers (Fig. 5D), whereas  $\Delta$ mascrRNA monocyte medium had no such effect. This observation of transcriptome changes in endothelial cells under influence of the  $\Delta$ menRNA monocyte secretome prompted further studies regarding indirect influence of the anomalous monocyte clones upon endothelial cell behaviour, mediated *via* their secretomes, or *via* interaction between the monocytes and endothelial cells in co-cultures of both cell types in matrigel (Fig. 5HI). RNA-seq identified profound deregulation of further cell adhesion molecules in  $\Delta$ menRNA monocytes (Fig. 5EF, Table S1G), including adhesion G protein-coupled receptors [100], intercellular and neural cell adhesion molecules, integrins, vascular cell adhesion molecule, melanoma cell adhesion molecule MCAM (CD146), and endothelial cell-specific adhesion molecule (ESAM).  $\Delta$ mascrRNA cells also displayed anomalous cell adhesion molecule expression (Fig. 5G, Table S2G), however distinct from  $\Delta$ menRNA monocytes. Neuronal growth regulator NEGR1 [101, 102] is ~28-fold suppressed in  $\Delta$ menRNA but unaltered in  $\Delta$ mascrRNA monocytes, whereas cytoskeleton regulating NCKAP1 [103-107] was ~14-fold increased in  $\Delta$ mascrRNA while unaltered in  $\Delta$ menRNA cells. lncRNA SENCN, involved in maintenance of endothelial cell homeostasis [108-110], is ~12-fold down in  $\Delta$ menRNA monocytes (Table S2D), suggesting menRNA loss may lead to SENCN downregulation and cellular dysfunction in endothelial cells, too.

### ***Impact of $\Delta$ menRNA and $\Delta$ mascrRNA monocytes upon angiogenesis***

A quantitative effect of  $\Delta$ menRNA and  $\Delta$ mascrRNA monocyte-conditioned media upon HAEC-based tube formation was observed in matrigel assays. Supernatant from each of the defective cell clones significantly reduced the tube number (Fig. 5H). Beyond this quantitative effect of secreted factors from the cells, direct co-culture of  $\Delta$ menRNA as well as of  $\Delta$ mascrRNA monocytes with the HAECs in the matrigel assay lead to profound alterations of HAEC cell morphology (Fig. 5I). In co-cultures with either of the defective monocyte clones, there was a massive increase in the size of HAECs at branch side nodes where  $\geq 3$  endothelial cells came into contact. When the defective monocytes clones were stained red before addition to the HAEC-matrigel mixture, there was significant accumulation of red cells at branch side nodes where HAEC hypertrophy occurred (Fig. 5I). Consistent



with these observations, multiple growth and angiogenesis-associated factors and chemokines [111-122] were in disequilibrium in  $\Delta$ menRNA (Fig. 5KL, Table S1H) and  $\Delta$ mascRNA monocytes (Fig. 5M, Table S12H).

#### ***Response of $\Delta$ menRNA and $\Delta$ mascRNA macrophages to human-pathogenic viruses***

PMA-based *in vitro* differentiation of  $\Delta$ menRNA and  $\Delta$ mascRNA monocytes into adherent macrophages rendered the cells susceptible to transduction by recombinant adenovirus expressing GFP (Suppl. Fig. S8A). Similarly,  $\Delta$ menRNA and  $\Delta$ mascRNA macrophages became transducible with human coxsackievirus B3 (CVB3) and displayed an immune response to the internalized CVB3 ssRNA genome, in the absence of active CVB3 virus replication (Suppl. Fig. S8B). In  $\Delta$ menRNA macrophages, without LPS stimulation or adenovirus transduction, IL8 expression was >100-fold induced compared to controls (Fig. 6A). Adenovirus resulted in moderate IL8 decrease, while control cells retained extremely low IL8 expression upon transduction. Several other genes had significantly higher baseline expression in  $\Delta$ menRNA macrophages, either *without* response to virus (TNF, SLFN12L, NOD2, TLR2, IL1B), or with significant *further* induction upon exposure (RIG-like receptors RLR1 and RLR2, ISG 15, TGFB2). Most conspicuous was a complete shutdown of genes suppressed in  $\Delta$ menRNA monocytes (Fig. 3A-E, Fig. 4EF) already before their transformation into macrophages: NOD-like innate immune genes NLRC3 and MEFV, IL2 receptor subunits  $\beta$  and  $\gamma$  [79-85], transcription factor TWIST2 [52], and NFATC2 [55]. None of these genes fully silenced in macrophages could be 'rescued' by adenovirus exposure (Fig. 6A), similar to findings in LPS-stimulated monocytes (Fig. 3A-E, Fig. 4EF). Fig. 6B shows the response of  $\Delta$ menRNA macrophages to CVB3. Regarding IL8, their response to CVB3 with further IL8 induction beyond their already very high baseline level, was opposite to their anti-adenovirus reaction. ISG15 and IL1B responded similarly to CVB3 and RR5, while IRF7 and IRF9 expression were downregulated by CVB3 only. Inducible NO synthase (NOS2) expression as well as ROS production upon LPS or H2O2 challenge was significantly reduced in  $\Delta$ menRNA macrophages (Fig. 6C). Fig. 6D summarizes key defects of the antiviral response.

#### ***menRNA deletion critically disturbs scavenger receptor expression and oxLDL uptake***

$\Delta$ menRNA macrophages display loss of oxLDL uptake, consistent with their loss of scavenger receptor expression (Fig. 7A-C) [123-129].  $\Delta$ menRNA cells showed further anomalies regarding receptors involved in phagocytosis: Fc $\gamma$  receptors (Fc $\gamma$ Rs) [130-133] and complement receptors (CRs) [134] (Fig. 8).

#### ***Defective monocyte-macrophage transition and polarization of $\Delta$ menRNA and $\Delta$ mascRNA cells***

$\Delta$ menRNA monocytes are unable to normally differentiate into M0 macrophages upon PMA exposure (Fig. 9A). This is consistent with disturbances of CD molecule expression in these cells, including CD11b (ITGAM), CD11c (ITGAX) [135, 136], and CD93 [97, 137-148].

Beyond monocyte-macrophage transition, there was defective M1/M2 polarization [149, 150] of  $\Delta$ menRNA and  $\Delta$ mascRNA cells. Rather simple expression profiles allowed distinction between  $\Delta$ mascRNA and  $\Delta$ menRNA macrophages and controls (Fig. 9BC). A "M2-like" pattern CD163<sup>hi</sup> CD200R<sup>hi</sup> CD206<sup>hi</sup> TGFB3<sup>hi</sup> TLR10<sup>hi</sup> was observed in  $\Delta$ mascRNA cells [151, 152]. A profile involving IL1B, CD93, TGFB2, TLR7, CSF1 and its receptor CSF1R [153-165] unequivocally characterizes  $\Delta$ menRNA monocytes-macrophages and is preserved through polarization. Upon prolonged culture, the morphological aspect of M2-polarized  $\Delta$ menRNA cell cultures was clearly distinct from control and  $\Delta$ mascRNA cells (Fig. 9D).

## **Discussion**

*NEAT1* and *MALAT1* are involved in two fields of medicine (cardiovascular and malignant diseases) linked to some degree by common immune-related mechanisms [5, 6, 8, 9, 11]. A unified concept to explain the connections of this genomic region to apparently diverse diseases may be derived from recent observations regarding immunoregulatory functions of transcripts from this cluster, encompassing the current study assigning novel immune functions to both tRNA-like transcripts. Despite differences in their specific regulatory properties,

it appears that the fundamental principle of 'employing' this peculiar type of small ncRNAs was evolutionarily advantageous.

**Prior studies of the NEAT1-MALAT1 cluster:** We reported suppression of lncRNA *NEAT1* in circulating immune cells of post-MI patients. In mice lacking lncRNAs *NEAT1* [1] or *MALAT1* [2-4] we observed immune disturbances rendering the immune system unstable and highly vulnerable to immune stress. *MALAT1*<sup>-/-</sup> ApoE<sup>-/-</sup> mice suffered accelerated atherosclerosis despite normal diet compared to ApoE<sup>-/-</sup> mice. *NEAT1*<sup>-/-</sup> mice showed anomalous T cell and monocyte-macrophage differentiation, and systemic inflammation. *NEAT1* promotes inflammasome activation in macrophages, regulates M2 polarization [166], and influences Th17/CD4<sup>+</sup> T cell differentiation. *NEAT1* knockdown induces a tolerogenic phenotype in dendritic cells by inhibiting NLRP3 inflammasome activation [167]. Further *NEAT1* or *MALAT1* related anomalies were reported in non-immune cell types: cardiomyocytes [168-171] [172], endothelial cells, and smooth muscle cells where an HDAC9-MALAT1-BRG1 complex mediates dysfunction [173, 174]. Clinically, *NEAT1* correlated with increased exacerbation risk, severity, and inflammation in asthma [175], and with worse disease condition and poor recurrence-free survival in acute ischemic stroke. *NEAT1* is elevated in peripheral blood cells of Parkinson disease patients [176] and abnormally expressed in a wide variety of human cancers [177].

**Functional dissection of the NEAT1-menRNA system:** A subset of lncRNAs, termed architectural RNAs (arcRNAs), function in formation and maintenance of phase-separated membraneless organelles. In the crowded intracellular environment these are important forms of compartmentalization. Thus, *NEAT1* is a well-characterized arcRNA acting as an essential scaffold of paraspeckle nuclear bodies [178-185].

In contrast, no biological function of menRNA independent of its precursor *NEAT1* have been described, while a few studies have already addressed mascRNA in that regard. Our functional data were obtained by CRISPR-Cas9 mediated highly selective disruption of the menRNA sequence 21nt downstream of the 3'-terminus MEN-β. Importantly, this leaves the regular triple-helix formation at the 3'-end of MEN-β unaffected, which is essential for its stabilization. Consistent with the current model of the *NEAT1*-menRNA system, the CRISPR-Cas9-generated ΔmenRNA cells displayed no alteration of MEN-β or MEN-ε expression levels.

Although the very low abundance of menRNA generates experimental challenges, specificity of the observed effects of menRNA disruption may be derived by synopsis of the following findings: 1. Northern analysis detects menRNA in the experimental model cells (wildtype and CRISPR-Cas9 control THP-1 cells); 2, sequencing confirms exactly stable deletion of essentially all of the menRNA-generating sequence; 3. consistent with this no menRNA signal is detected in the ΔmenRNA clone; 4. this deletion is clearly separate by 21nt from the upstream MEN-β transcript with its 3' triple-helix terminus; 5. The cellular levels of MEN-β and MEN-ε appear unaffected by the menRNA disruption.

Our study may be considered extension of previous pioneering work by Yamazaki *et al.* identifying the key functional domains of MEN-β through CRISPR-Cas9 based deletion mapping [17]. While covering the entire length of MEN-β, that study has not reported on deletions downstream of the 3'-terminal A-rich motif essential for triple-helix formation and stabilization of MEN-β.

Unless the RNaseZ cleavage site at the 3'-end of menRNA (deleted in the ΔmenRNA clone) has some unknown function other than supporting menRNA formation, the data indicate deep impact of selective menRNA disruption upon innate immunity and macrophage functions. While the current dataset does not allow to derive a mechanism of action for menRNA, the chosen experimental design should allow assignment of the observed cellular anomalies – discussed below - to menRNA *per se*.

**MALAT1-independent functions of mascRNA:** After a report that mascRNA is involved in cardiovascular innate immunity [3], Sun *et al.* conducted an in-depth study demonstrating that mascRNA differentially regulates TLR-induced proinflammatory and antiviral responses [22]. Lu *et al.* showed that mascRNA promotes global protein translation, uncovering another role of mascRNA that is independent of *MALAT1* [23].

Our CRISPR-Cas9-based editing of mascRNA essentially confirmed the prior reports on immunomodulating functions of mascRNA. Permanent mascRNA depletion obviates the need to repetitively add ASOs or siRNAs to

keep mascRNA down. This experimental feature significantly simplified long-term experiments (Fig. 5, 7, 9) revealing imbalance of cell-cell interactions system and angiogenesis, phagocytosis-related genes, and differentiation and polarization of  $\Delta$ mascRNA monocytes and macrophages.

**Critical defects of innate immune sensing:** One key finding in  $\Delta$ menRNA cells was deregulation of membrane-bound (TLR2) and cytosolic immune sensors (Fig. 3). NOD2 [35, 36, 39, 40] and CIITA [43-45] were massively induced while NLR-class receptors NLRC3 [46-48] and MEFV [48, 50, 51] were shut off in  $\Delta$ menRNA cells and could be rescued neither by LPS nor virus exposure. TWIST2, a critical regulator of cytokines in human monocyte-derived macrophages [52], NFATC2 which translocates to the nucleus upon T cell receptor stimulation [55], and IL2 receptor subunits  $\beta$  and  $\gamma$  [79-82][83-85] were likewise shut down and not rescuable. Further, there was massive downregulation of lncRNA ROCK1, apparently resulting from mere deletion of the small 'menRNA' sequence from an otherwise intact ~23 kb *NEAT1*. An important recent study [67] discovered that ROCK1 is a master regulator of inflammatory responses. Beyond the transcription level,  $\Delta$ menRNA and  $\Delta$ mascRNA cells displayed major changes of their epigenomes (Fig. 3).

**Loss of inflammatory cytokine control:**  $\Delta$ menRNA and  $\Delta$ mascRNA cells display anomalous antiviral responses (Fig. 5). Even in absence of infectious agents or other immune challenges, however,  $\Delta$ menRNA cells display massive inductions of IL8 and TNF (Fig. 4). Regarding IL8, clinical observational studies suggest a critical role of IL8 in cardiovascular diseases [186-194] and stroke [195-197]. IL8 is mechanistically involved in the innate immune response by TLR4 signaling, induces neutrophil extracellular traps (NETs) *via* activation NF $\kappa$ B signaling [198], mediates hyper-signaling in aortic aneurysms, and is involved in endothelial adhesion [199]. With regard to IL8, our prior transcriptome analysis of circulating immune cells from post-MI patients [1] is of interest. IL8 was the most decisively upregulated gene post-MI, contrary to an extremely low level in healthy subjects, although all patients were receiving state-of-the-art post-MI pharmacological treatment. In that study, the long primary lncRNA transcript *NEAT1* was significantly suppressed in post-MI PBMCs. The new data from  $\Delta$ menRNA cells are consistent with the assumption that reduction of the menRNA level in PBMCs (consecutive to or independent of the observed *NEAT1* reduction) directly contributes to IL8 induction. Further, the marked IL1B induction in post-MI PBMCs would parallel the high baseline IL1B expression in  $\Delta$ menRNA cells. It would have been most interesting to directly measure menRNA levels in the post-MI PBMCs. Due to the complex secondary and tertiary structure of mature menRNA this would have required, however, Northern blot analyses for which there was insufficient RNA available in that former post-MI study. For future translational studies, our approach to study menRNA and mascRNA directly suggests new avenue since their highly dynamic levels may be more closely related to clinical parameters and clinical course than those of their nuclear precursors.

**Imbalance of angiogenic factors and chemokine systems:** Excessive inflammatory cytokine production appears as one downstream consequence of defective immune sensing. Imbalance of angiogenic factors, chemokines, and cell-cell adhesion molecules may be considered as further sequelae of dysfunction at the sensor level. It is not unexpected that the anomalies at this level should have far-reaching impact upon the cells' biological behavior. Thus, irrespective of differences between  $\Delta$ menRNA and  $\Delta$ mascRNA cells, both significantly decreased tube formation in matrigel assay and displayed profound deregulation of cell-cell adhesion molecules (Fig. 5). In the case of  $\Delta$ menRNA cells, the latter was immediately apparent by their anomalous growth in clusters, and their defective endothelial flow adhesion to HAECs. While de-repression of multiple growth/angiogenetic factors appears directly linked to anomalous endothelial cell growth and morphology in the monocyte-endothelial cell co-cultures, this imbalance of growth/angiogenetic factors apparently does not support effective tube formation, but instead hinders it.

**Defective foam cell formation and macrophage polarization:** This occurs in the context of large-scale disturbance of the cells' immune sensors from NOD-like and Toll-like (Fig. 3) to phagocytosis-related receptors (Fig. 7 and 8). Overall, the cells are unable to adequately respond to immune challenges including LPS, viruses,

oxLDL, and polarization cytokines (Fig. 9). Defective interaction with endothelium and angiogenesis-promoting matrix may be added to their anomalous relationship with the environment (Fig. 5).

**Loss of nucleus-to-cytosol supply of menRNA or mascRNA:** As both menRNA and mascRNA are continuously exported from nucleus to cytosol under normal conditions (Fig. 10), changes of the translational/ribosomal apparatus may be linked to the complete loss of nucleus-to-cytosol supply of these tRNA-like molecules in the defective cells. Regarding definition of an underlying molecular mechanism, this is beyond the scope of the current study with an experimental strategy clearly focused upon identification of novel biological roles for mascRNA – and any such roles for menRNA – at the cellular and cell-cell interaction level. Given the extreme complexity of tRNA biology [30, 122, 200-203], a different experimental strategy will be needed to address the molecular level.

Notably, mascRNA displays very high steady-state levels within immune cells, while other cell types are essentially devoid of it, although they do express precursor *MALAT1* at normal levels [3]. Sun *et al.* conducted an in-depth study demonstrating that mascRNA differentially regulates TLR-induced proinflammatory and antiviral responses [22]. While the exact molecular function of the high mascRNA levels in immune cells remains undefined in humans and other species carrying *MALAT1*-like genomic loci [23], key importance for immune homeostasis was highly likely by inference and is definitely confirmed by the present data. In this context, a recent study by Lu *et al.* [23] is of interest showing that mascRNA binds directly to multi-tRNA synthetase complex component glutaminyl-tRNA synthetase, and promotes global protein translation and cell proliferation by positively regulating QARS protein levels. This is consistent with our working hypothesis that mascRNA and menRNA interact with the ribosomal machinery as a consequence of their tRNA-like structure.

In the case of menRNA, on the other hand, the steady-state levels in immune cells are very low. This may be entirely due, however, to the known CCACCA-tagging of menRNA for rapid degradation [21, 30, 200, 203, 204]. menRNA's primary nucleus-to-cytosol supply rate may be similar to that of mascRNA, which just remains stable as it is not CCACCA-tagged.  $\Delta$ menRNA cells display major disequilibrium at the tRNA/translational level with induction of initiation and elongation factors EIF3CL, EEF1A2 and CTIF, whereas translation initiation factor EIF1AY [58] was switched off. Further, there was deregulation of tRNAs, tRNA methyltransferases (TRMT61, TRMT2B), and RNA methyltransferase NSUN7.

Pioneering recent studies discovered hitherto unknown immune functions of tRNAs and their enzymatic processing products and may contribute to explain our current findings regarding the impact of menRNA and mascRNA ablation. tRNA products encompass tRNA-derived small RNAs (tsRNAs), tRNA-derived stress-induced RNAs (tiRNAs), and tRNA-derived fragments (tRFs). Pereira *et al.* [120] found that m(5)U54 tRNA hypomodification, from lack of methyltransferase TRMT2A, drives tsRNAs generation. As similar tRNA methyltransferases are deregulated in  $\Delta$ menRNA and  $\Delta$ mascRNA cells, this may change tsRNA generation therein.

Yue *et al.* [121] found SLFN2 protection of tRNAs from stress-induced cleavage to be essential for T cell-mediated immunity. SLFN2 binds tRNAs and protects them from cleavage by the ribonuclease angiogenin (~12-fold induced in  $\Delta$ mascRNA cells) [116, 120]. SLFN2 deficient T cells display accumulation of stress-induced tiRNAs which inhibit translation and promote stress-granule formation. They found IL2R- $\beta$  and IL2R- $\gamma$  fail to be translationally up-regulated after T cell receptor stimulation, while we observed ~52-fold IL2R- $\beta$  and ~13-fold IL2R- $\gamma$  suppression in  $\Delta$ menRNA monocytes upon LPS stimulation. In these cells, SLFN family member SLFN12L was ~31-fold induced whereas SLNF5 was ~10-fold suppressed compared to controls. Yue *et al.* showed ROS trigger an oxidative stress response leading to translation repression which is countered by SLFN2. In  $\Delta$ menRNA monocytes we found LPS-stimulated ROS production as well as NOS2 expression are blunted, suggesting disturbance of a regulatory circuit encompassing menRNA, SLFN family members [86, 205-211], and NO and ROS biosynthetic enzymes in these defective cells.

**Genetic variability of the NEAT1-MALAT1 genomic region in humans:** Since multiple data suggests inflammation control functions of the NEAT1-MALAT1 cluster, we investigated variability of this region within a cohort of 7.500 individuals from Central Europe (Suppl. Fig. S5 and S6AB). One rare MALAT1 SNP (MAF=0.01)

in the MALAT1 promotor was associated ( $p=0.0062$ ) with systemic low level inflammation ( $CRP>3.0$  mg/L) (Suppl. Fig. S7A). The current study was not designed to identify possible phenotype associations with mascRNA or menRNA sequence variants known to occur in humans (Suppl. Fig. S4). Given the functional sensitivity of the tRNA-like sequences to point mutations, it seems worthwhile to obtain full sequences in patient cohorts suffering from atherosclerosis and other disorders associated with chronic low-level inflammation.

## 5. Conclusions

Beyond prior work in mice documenting immune function of the *NEAT1-MALAT1* region, the current study identifies menRNA and mascRNA as novel components of innate immunity with deep impact upon cytokine regulation, immune cell - endothelium interactions, angiogenesis, and macrophage formation and functions. These tRNA-like transcripts are prototypes of a new class of ncRNAs distinct from other small transcripts (miRNAs, siRNAs) by biosynthetic pathway and intracellular kinetics, suggesting a novel link for the apparent relevance of the *NEAT1-MALAT1* cluster in cardiovascular and neoplastic diseases. The *NEAT1-MALAT1* region has emerged as a highly integrated RNA processing circuitry. Its components MEN- $\beta$ , MEN- $\epsilon$ , menRNA, *MALAT1*, *TALAM1*, and mascRNA are set for well-balanced interactions with each other, and ablation of any element leads to major cellular and systemic dysfunction. For future translational studies, our approach to study menRNA and mascRNA directly suggests new avenue since their highly dynamic levels may be more closely related to clinical parameters and clinical course than those of their nuclear precursors. They may also have value as therapeutic targets for pharmacological intervention since they are more easily accessible than their extremely complex nuclear-located precursor molecules.

## References

1. Abramiuk M, Grywalska E, Korona-Glowniak I, Niedzwiedzka-Rystwej P, Polak G, Kotarski J, Rolinski J (2020) CD200 and CD200R Expression on Peripheral Blood Lymphocytes and Serum CD200 Concentration as a New Marker of Endometriosis. *J Clin Med* 9 doi:10.3390/jcm9093035
2. Afzal TA, Luong LA, Chen D, Zhang C, Yang F, Chen Q, An W, Wilkes E, Yashiro K, Cutillas PR, Zhang L, Xiao Q (2016) NCK Associated Protein 1 Modulated by miRNA-214 Determines Vascular Smooth Muscle Cell Migration, Proliferation, and Neointima Hyperplasia. *J Am Heart Assoc* 5 doi:10.1161/JAHA.116.004629
3. Aguilo F, Li S, Balasubramaniyan N, Sancho A, Benko S, Zhang F, Vashisht A, Rengasamy M, Andino B, Chen CH, Zhou F, Qian C, Zhou MM, Wohlschlegel JA, Zhang W, Suchy FJ, Walsh MJ (2016) Deposition of 5-Methylcytosine on Enhancer RNAs Enables the Coactivator Function of PGC-1 $\alpha$ . *Cell Rep* 14:479-492 doi:10.1016/j.celrep.2015.12.043
4. Akiyama Y, Tomioka Y, Abe T, Anderson P, Ivanov P (2021) In lysate RNA digestion provides insights into the angiogenin's specificity towards transfer RNAs. *RNA Biol*:1-10 doi:10.1080/15476286.2021.1930758
5. Akkuratov EE, Walters L, Saha-Mandal A, Khandekar S, Crawford E, Zirbel CL, Leisner S, Prakash A, Fedorova L, Fedorov A (2014) Bioinformatics analysis of plant orthologous introns: identification of an intronic tRNA-like sequence. *Gene* 548:81-90 doi:10.1016/j.gene.2014.07.012
6. Alehagen U, Shamoun L, Wagsater D (2020) Genetic variance and plasma concentration of CD93 is associated with cardiovascular mortality: Results from a 6.7year followup of a healthy communityliving elderly population. *Mol Med Rep* 22:4629-4636 doi:10.3892/mmr.2020.11555
7. An Z, Li J, Yu J, Wang X, Gao H, Zhang W, Wei Z, Zhang J, Zhang Y, Zhao J, Liang X (2019) Neutrophil extracellular traps induced by IL-8 aggravate atherosclerosis via activation NF-kappaB signaling in macrophages. *Cell Cycle* 18:2928-2938 doi:10.1080/15384101.2019.1662678
8. Angelos MG, Abrahante JE, Blum RH, Kaufman DS (2018) Single Cell Resolution of Human Hematoendothelial Cells Defines Transcriptional Signatures of Hemogenic Endothelium. *Stem Cells* 36:206-217 doi:10.1002/stem.2739
9. Apostolakis S, Vogiatzi K, Amanatidou V, Spandidos DA (2009) Interleukin 8 and cardiovascular disease. *Cardiovasc Res* 84:353-360 doi:10.1093/cvr/cvp241
10. Ard R, Maillet JC, Daher E, Phan M, Zinoviev R, Parks RJ, Gee SH (2021) PKC $\alpha$ -mediated phosphorylation of the diacylglycerol kinase zeta MARCKS domain switches cell migration modes by regulating interactions with Rac1 and RhoA. *J Biol Chem*:100516 doi:10.1016/j.jbc.2021.100516

11. Arslan AD, Sassano A, Saleiro D, Lisowski P, Kosciuczuk EM, Fischietti M, Eckerdt F, Fish EN, Platanius LC (2017) Human SLFN5 is a transcriptional co-repressor of STAT1-mediated interferon responses and promotes the malignant phenotype in glioblastoma. *Oncogene* 36:6006-6019 doi:10.1038/onc.2017.205
12. Bailey CC, Zhong G, Huang IC, Farzan M (2014) IFITM-Family Proteins: The Cell's First Line of Antiviral Defense. *Annu Rev Virol* 1:261-283 doi:10.1146/annurev-virology-031413-085537
13. Banani SF, Lee HO, Hyman AA, Rosen MK (2017) Biomolecular condensates: organizers of cellular biochemistry. *Nat Rev Mol Cell Biol* 18:285-298 doi:10.1038/nrm.2017.7
14. Bassilana F, Nash M, Ludwig MG (2019) Adhesion G protein-coupled receptors: opportunities for drug discovery. *Nat Rev Drug Discov* 18:869-884 doi:10.1038/s41573-019-0039-y
15. Bauche D, Joyce-Shaikh B, Jain R, Grein J, Ku KS, Blumenschein WM, Ganai-Vonarburg SC, Wilson DC, McClanahan TK, Malefyt RW, Macpherson AJ, Annamalai L, Yearley JH, Cua DJ (2018) LAG3(+) Regulatory T Cells Restrain Interleukin-23-Producing CX3CR1(+) Gut-Resident Macrophages during Group 3 Innate Lymphoid Cell-Driven Colitis. *Immunity* 49:342-352 e345 doi:10.1016/j.immuni.2018.07.007
16. Betat H, Morl M (2015) The CCA-adding enzyme: A central scrutinizer in tRNA quality control. *Bioessays* 37:975-982 doi:10.1002/bies.201500043
17. Boels MGS, Koudijs A, Avramut MC, Sol W, Wang G, van Oeveren-Rietdijk AM, van Zonneveld AJ, de Boer HC, van der Vlag J, van Kooten C, Eulberg D, van den Berg BM, DHT IJ, Rabelink TJ (2017) Systemic Monocyte Chemotactic Protein-1 Inhibition Modifies Renal Macrophages and Restores Glomerular Endothelial Glycocalyx and Barrier Function in Diabetic Nephropathy. *Am J Pathol* 187:2430-2440 doi:10.1016/j.ajpath.2017.07.020
18. Boros FA, Maszlag-Torok R, Vecsei L, Klivenyi P (2020) Increased level of NEAT1 long non-coding RNA is detectable in peripheral blood cells of patients with Parkinson's disease. *Brain Res* 1730:146672 doi:10.1016/j.brainres.2020.146672
19. Boulberdaa M, Scott E, Ballantyne M, Garcia R, Descamps B, Angelini GD, Brittan M, Hunter A, McBride M, McClure J, Miano JM, Emanueli C, Mills NL, Mountford JC, Baker AH (2016) A Role for the Long Noncoding RNA SENCN in Commitment and Function of Endothelial Cells. *Mol Ther* 24:978-990 doi:10.1038/mt.2016.41
20. Brocheriou I, Maouche S, Durand H, Brauersreuther V, Le Naour G, Gratchev A, Koskas F, Mach F, Kzhyshkowska J, Ninio E (2011) Antagonistic regulation of macrophage phenotype by M-CSF and GM-CSF: implication in atherosclerosis. *Atherosclerosis* 214:316-324 doi:10.1016/j.atherosclerosis.2010.11.023
21. Browne T, Dearman RJ, Poles A (2021) Human neutrophil antigens: Nature, clinical significance and detection. *Int J Immunogenet* 48:145-156 doi:10.1111/iji.12514
22. Buechler C, Eisinger K, Krautbauer S (2013) Diagnostic and prognostic potential of the macrophage specific receptor CD163 in inflammatory diseases. *Inflamm Allergy Drug Targets* 12:391-402
23. Callejas BE, Blyth GAD, Jendzjowsky N, Wang A, Babbar A, Koro K, Wilson RJA, Kelly MM, Cobo ER, McKay DM (2021) Interleukin-4 Programmed Macrophages Suppress Colitis and Do Not Enhance Infectious-Colitis, Inflammation-Associated Colon Cancer or Airway Hypersensitivity. *Front Immunol* 12:744738 doi:10.3389/fimmu.2021.744738
24. Cannarile MA, Weisser M, Jacob W, Jegg AM, Ries CH, Ruttinger D (2017) Colony-stimulating factor 1 receptor (CSF1R) inhibitors in cancer therapy. *J Immunother Cancer* 5:53 doi:10.1186/s40425-017-0257-y
25. Canton J, Neculai D, Grinstein S (2013) Scavenger receptors in homeostasis and immunity. *Nat Rev Immunol* 13:621-634 doi:10.1038/nri3515
26. Carpio MA, Michaud M, Zhou W, Fisher JK, Walensky LD, Katz SG (2015) BCL-2 family member BOK promotes apoptosis in response to endoplasmic reticulum stress. *Proc Natl Acad Sci U S A* 112:7201-7206 doi:10.1073/pnas.1421063112
27. Caruso R, Warner N, Inohara N, Nunez G (2014) NOD1 and NOD2: signaling, host defense, and inflammatory disease. *Immunity* 41:898-908 doi:10.1016/j.immuni.2014.12.010
28. Castrillo A, Tontonoz P (2004) Nuclear receptors in macrophage biology: at the crossroads of lipid metabolism and inflammation. *Annu Rev Cell Dev Biol* 20:455-480 doi:10.1146/annurev.cellbio.20.012103.134432
29. Chakarov S, Lim HY, Tan L, Lim SY, See P, Lum J, Zhang XM, Foo S, Nakamizo S, Duan K, Kong WT, Gentek R, Balachander A, Carbajo D, Bleriot C, Malleret B, Tam JKC, Baig S, Shabeer M, Toh SES, Schlitzer A, Larbi A, Marichal T, Malissen B, Chen J, Poidinger M, Kabashima K, Bajenoff M, Ng LG, Angeli V, Ginhoux F (2019) Two distinct interstitial macrophage populations coexist across tissues in specific subtissular niches. *Science* 363 doi:10.1126/science.aau0964
30. Chang SF, Chang PY, Chou YC, Lu SC (2020) Electronegative LDL Induces M1 Polarization of Human Macrophages Through a LOX-1-Dependent Pathway. *Inflammation* 43:1524-1535 doi:10.1007/s10753-020-01229-6
31. Chen DD, Hui LL, Zhang XC, Chang Q (2018) NEAT1 contributes to ox-LDL-induced inflammation and oxidative stress in macrophages through inhibiting miR-128. *J Cell Biochem* doi:10.1002/jcb.27541

32. Chen H, Xia W, Hou M (2020) LncRNA-NEAT1 from the competing endogenous RNA network promotes cardioprotective efficacy of mesenchymal stem cell-derived exosomes induced by macrophage migration inhibitory factor via the miR-142-3p/FOXO1 signaling pathway. *Stem Cell Res Ther* 11:31 doi:10.1186/s13287-020-1556-7
33. Chen L, Cao SQ, Lin ZM, He SJ, Zuo JP (2021) NOD-like receptors in autoimmune diseases. *Acta Pharmacol Sin* doi:10.1038/s41401-020-00603-2
34. Chen W, Yan Z, Li S, Huang N, Huang X, Zhang J, Zhong S (2018) RNAs as Proximity-Labeling Media for Identifying Nuclear Speckle Positions Relative to the Genome. *iScience* 4:204-215 doi:10.1016/j.isci.2018.06.005
35. Chen Y, Zhang Y, Wang Y, Zhang L, Brinkman EK, Adam SA, Goldman R, van Steensel B, Ma J, Belmont AS (2018) Mapping 3D genome organization relative to nuclear compartments using TSA-Seq as a cytological ruler. *J Cell Biol* 217:4025-4048 doi:10.1083/jcb.201807108
36. Chernykh ER, Shevela EY, Starostina NM, Morozov SA, Davydova MN, Menyaeva EV, Ostanin AA (2016) Safety and Therapeutic Potential of M2 Macrophages in Stroke Treatment. *Cell Transplant* 25:1461-1471 doi:10.3727/096368915X690279
37. Chevrier S, Genton C, Kallies A, Karnowski A, Otten LA, Malissen B, Malissen M, Botto M, Corcoran LM, Nutt SL, Acha-Orbea H (2009) CD93 is required for maintenance of antibody secretion and persistence of plasma cells in the bone marrow niche. *Proc Natl Acad Sci U S A* 106:3895-3900 doi:10.1073/pnas.0809736106
38. Chidambaram H, Das R, Chinnathambi S (2020) Interaction of Tau with the chemokine receptor, CX3CR1 and its effect on microglial activation, migration and proliferation. *Cell Biosci* 10:109 doi:10.1186/s13578-020-00474-4
39. Chistiakov DA, Melnichenko AA, Myasoedova VA, Grechko AV, Orekhov AN (2017) Mechanisms of foam cell formation in atherosclerosis. *J Mol Med (Berl)* 95:1153-1165 doi:10.1007/s00109-017-1575-8
40. Cho YS, Challa S, Moquin D, Genga R, Ray TD, Guildford M, Chan FK (2009) Phosphorylation-driven assembly of the RIP1-RIP3 complex regulates programmed necrosis and virus-induced inflammation. *Cell* 137:1112-1123 doi:10.1016/j.cell.2009.05.037
41. Cimini FA, Barchetta I, Porzia A, Mainiero F, Costantino C, Bertocchini L, Ceccarelli V, Morini S, Baroni MG, Lenzi A, Cavallo MG (2017) Circulating IL-8 levels are increased in patients with type 2 diabetes and associated with worse inflammatory and cardiometabolic profile. *Acta Diabetol* 54:961-967 doi:10.1007/s00592-017-1039-1
42. Clynes R, Maizes JS, Guinamard R, Ono M, Takai T, Ravetch JV (1999) Modulation of immune complex-induced inflammation in vivo by the coordinate expression of activation and inhibitory Fc receptors. *J Exp Med* 189:179-185 doi:10.1084/jem.189.1.179
43. Cominelli A, Gaide Chevonnay HP, Lemoine P, Courtoy PJ, Marbaix E, Henriot P (2014) Matrix metalloproteinase-27 is expressed in CD163+/CD206+ M2 macrophages in the cycling human endometrium and in superficial endometriotic lesions. *Mol Hum Reprod* 20:767-775 doi:10.1093/molehr/gau034
44. Cremer S, Michalik KM, Fischer A, Pfisterer L, Jae N, Winter C, Boon RA, Muhly-Reinholz M, John D, Uchida S, Weber C, Poller W, Gunther S, Braun T, Li DY, Maegdefessel L, Perisic Matic L, Hedin U, Soehnlein O, Zeiher A, Dimmeler S (2019) Hematopoietic Deficiency of the Long Noncoding RNA MALAT1 Promotes Atherosclerosis and Plaque Inflammation. *Circulation* 139:1320-1334 doi:10.1161/CIRCULATIONAHA.117.029015
45. Cruikshank WW, Kornfeld H, Center DM (2000) Interleukin-16. *J Leukoc Biol* 67:757-766 doi:10.1002/jlb.67.6.757
46. Czabotar PE, Lessene G, Strasser A, Adams JM (2014) Control of apoptosis by the BCL-2 protein family: implications for physiology and therapy. *Nat Rev Mol Cell Biol* 15:49-63 doi:10.1038/nrm3722
47. D'Souza AR, Minczuk M (2018) Mitochondrial transcription and translation: overview. *Essays Biochem* 62:309-320 doi:10.1042/EBC20170102
48. Dagoneau N, Bellais S, Blanchet P, Sarda P, Al-Gazali LI, Di Rocco M, Huber C, Djouadi F, Le Goff C, Munnich A, Cormier-Daire V (2007) Mutations in cytokine receptor-like factor 1 (CRLF1) account for both Crisponi and cold-induced sweating syndromes. *Am J Hum Genet* 80:966-970 doi:10.1086/513608
49. de Crecy-Lagard V, Boccaletto P, Mangleburg CG, Sharma P, Lowe TM, Leidel SA, Bujnicki JM (2019) Matching tRNA modifications in humans to their known and predicted enzymes. *Nucleic Acids Res* 47:2143-2159 doi:10.1093/nar/gkz011
50. DeNardo DG, Ruffell B (2019) Macrophages as regulators of tumour immunity and immunotherapy. *Nat Rev Immunol* 19:369-382 doi:10.1038/s41577-019-0127-6
51. Denny WA, Flanagan JU (2021) Small-molecule CSF1R kinase inhibitors; review of patents 2015-present. *Expert Opin Ther Pat* 31:107-117 doi:10.1080/13543776.2021.1839414
52. Du M, Yang L, Liu B, Yang L, Mao X, Liang M, Huang K (2021) Inhibition of NFAT suppresses foam cell formation and the development of diet-induced atherosclerosis. *FASEB J* 35:e21951 doi:10.1096/fj.202100947R
53. Duong CN, Nottebaum AF, Butz S, Volkery S, Zeuschner D, Stehling M, Vestweber D (2020) Interference With ESAM (Endothelial Cell-Selective Adhesion Molecule) Plus Vascular Endothelial-Cadherin Causes Immediate Lethality and Lung-Specific Blood Coagulation. *Arterioscler Thromb Vasc Biol* 40:378-393 doi:10.1161/ATVBAHA.119.313545

54. Eren E, Berber M, Ozoren N (2017) NLR3 protein inhibits inflammation by disrupting NALP3 inflammasome assembly via competition with the adaptor protein ASC for pro-caspase-1 binding. *J Biol Chem* 292:12691-12701 doi:10.1074/jbc.M116.769695
55. Fadini GP, de Kreutzenberg SV, Boscaro E, Albiero M, Cappellari R, Krankel N, Landmesser U, Toniolo A, Bolego C, Cignarella A, Seeger F, Dimmeler S, Zeiher A, Agostini C, Avogaro A (2013) An unbalanced monocyte polarisation in peripheral blood and bone marrow of patients with type 2 diabetes has an impact on microangiopathy. *Diabetologia* 56:1856-1866 doi:10.1007/s00125-013-2918-9
56. Fagerholm SC, MacPherson M, James MJ, Sevier-Guy C, Lau CS (2013) The CD11b-integrin (ITGAM) and systemic lupus erythematosus. *Lupus* 22:657-663 doi:10.1177/0961203313491851
57. Fei J, Jadalila M, Harmon TS, Li ITS, Hua B, Hao Q, Holehouse AS, Reyer M, Sun Q, Freier SM, Pappu RV, Prasanth KV, Ha T (2017) Quantitative analysis of multilayer organization of proteins and RNA in nuclear speckles at super resolution. *J Cell Sci* 130:4180-4192 doi:10.1242/jcs.206854
58. Fischietti M, Eckerdt F, Blyth GT, Arslan AD, Mati WM, Oku CV, Perez RE, Lee-Chang C, Kosciuczuk EM, Saleiro D, Beauchamp EM, Lesniak MS, Verzella D, Sun L, Fish EN, Yang GY, Qiang W, Platanias LC (2021) Schlafen 5 as a novel therapeutic target in pancreatic ductal adenocarcinoma. *Oncogene* 40:3273-3286 doi:10.1038/s41388-021-01761-1
59. Fore F, Indriputri C, Mamutse J, Nugraha J (2020) TLR10 and Its Unique Anti-Inflammatory Properties and Potential Use as a Target in Therapeutics. *Immune Netw* 20:e21 doi:10.4110/in.2020.20.e21
60. Frantz S, Vincent KA, Feron O, Kelly RA (2005) Innate immunity and angiogenesis. *Circ Res* 96:15-26 doi:10.1161/01.RES.0000153188.68898.ac
61. Galon J, Bruni D (2019) Approaches to treat immune hot, altered and cold tumours with combination immunotherapies. *Nat Rev Drug Discov* 18:197-218 doi:10.1038/s41573-018-0007-y
62. Galvagni F, Nardi F, Spiga O, Trezza A, Tarticchio G, Pellicani R, Andreuzzi E, Caldi E, Toti P, Tosi GM, Santucci A, Iozzo RV, Mongiat M, Orlandini M (2017) Dissecting the CD93-Multimerin 2 interaction involved in cell adhesion and migration of the activated endothelium. *Matrix Biol* 64:112-127 doi:10.1016/j.matbio.2017.08.003
63. Gao Y, Fang P, Li WJ, Zhang J, Wang GP, Jiang DF, Chen FP (2020) LncRNA NEAT1 sponges miR-214 to regulate M2 macrophage polarization by regulation of B7-H3 in multiple myeloma. *Mol Immunol* 117:20-28 doi:10.1016/j.molimm.2019.10.026
64. Gast M, Rauch BH, Haghighi A, Nakagawa S, Haas J, Stroux A, Schmidt D, Schumann P, Weiss S, Jensen L, Kratzer A, Kraenkel N, Muller C, Bornigen D, Hirose T, Blankenberg S, Escher F, Kuhl AA, Kuss AW, Meder B, Landmesser U, Zeller T, Poller W (2019) Long noncoding RNA NEAT1 modulates immune cell functions and is suppressed in early onset myocardial infarction patients. *Cardiovasc Res* 115:1886-1906 doi:10.1093/cvr/cvz085
65. Gast M, Rauch BH, Nakagawa S, Haghighi A, Jasina A, Haas J, Nath N, Jensen L, Stroux A, Bohm A, Friebe J, Rauch U, Skurk C, Blankenberg S, Zeller T, Prasanth KV, Meder B, Kuss A, Landmesser U, Poller W (2019) Immune system-mediated atherosclerosis caused by deficiency of long non-coding RNA MALAT1 in ApoE<sup>-/-</sup> mice. *Cardiovasc Res* 115:302-314 doi:10.1093/cvr/cvy202
66. Gast M, Schroen B, Voigt A, Haas J, Kuehl U, Lassner D, Skurk C, Escher F, Wang X, Kratzer A, Michalik K, Papageorgiou A, Peters T, Loebe M, Wilk S, Althof N, Prasanth KV, Katus H, Meder B, Nakagawa S, Scheibebogen C, Schultheiss HP, Landmesser U, Dimmeler S, Heymans S, Poller W (2016) Long noncoding RNA MALAT1-derived mascRNA is involved in cardiovascular innate immunity. *J Mol Cell Biol* 8:178-181 doi:10.1093/jmcb/mjw003
67. Geirsson A, Bothwell AL, Hammond GL (2004) Inhibition of alloresponse by a human trophoblast non-coding RNA suppressing class II transactivator promoter III and major histocompatibility class II expression in murine B-lymphocytes. *J Heart Lung Transplant* 23:1077-1081 doi:10.1016/j.healun.2004.07.020
68. Geirsson A, Lynch RJ, Paliwal I, Bothwell AL, Hammond GL (2003) Human trophoblast noncoding RNA suppresses CIITA promoter III activity in murine B-lymphocytes. *Biochem Biophys Res Commun* 301:718-724
69. Geirsson A, Paliwal I, Lynch RJ, Bothwell AL, Hammond GL (2003) Class II transactivator promoter activity is suppressed through regulation by a trophoblast noncoding RNA. *Transplantation* 76:387-394 doi:10.1097/01.TP.0000073612.04525.46
70. Gerszten RE, Garcia-Zepeda EA, Lim YC, Yoshida M, Ding HA, Gimbrone MA, Jr., Luster AD, Luscinskas FW, Rosenzweig A (1999) MCP-1 and IL-8 trigger firm adhesion of monocytes to vascular endothelium under flow conditions. *Nature* 398:718-723 doi:10.1038/19546
71. Geserick P, Kaiser F, Klemm U, Kaufmann SH, Zerrahn J (2004) Modulation of T cell development and activation by novel members of the Schlafen (slfn) gene family harbouring an RNA helicase-like motif. *Int Immunol* 16:1535-1548 doi:10.1093/intimm/dxh155
72. Godfrey AK, Naqvi S, Chmatal L, Chick JM, Mitchell RN, Gygi SP, Skaletsky H, Page DC (2020) Quantitative analysis of Y-Chromosome gene expression across 36 human tissues. *Genome Res* 30:860-873 doi:10.1101/gr.261248.120



73. Greenlee-Wacker MC, Galvan MD, Bohlson SS (2012) CD93: recent advances and implications in disease. *Curr Drug Targets* 13:411-420 doi:10.2174/138945012799424651
74. Griffiths MR, Botto M, Morgan BP, Neal JW, Gasque P (2018) CD93 regulates central nervous system inflammation in two mouse models of autoimmune encephalomyelitis. *Immunology* 155:346-355 doi:10.1111/imm.12974
75. Gu P, Theiss A, Han J, Feagins LA (2017) Increased Cell Adhesion Molecules, PECAM-1, ICAM-3, or VCAM-1, Predict Increased Risk for Flare in Patients With Quiescent Inflammatory Bowel Disease. *J Clin Gastroenterol* 51:522-527 doi:10.1097/MCG.0000000000000618
76. Gultekin Y, Eren E, Ozoren N (2015) Overexpressed NLR3 acts as an anti-inflammatory cytosolic protein. *J Innate Immun* 7:25-36 doi:10.1159/000363602
77. Guo H, Zhang Q, Dai R, Yu B, Hoekzema K, Tan J, Tan S, Jia X, Chung WK, Hernan R, Alkuraya FS, Alsulaiman A, Al-Muhaizea MA, Lesca G, Pons L, Labalme A, Laux L, Bryant E, Brown NJ, Savva E, Ayres S, Eratne D, Peeters H, Bilan F, Letienne-Cejudo L, Gilbert-Dussardier B, Ruiz-Arana IL, Merlini JM, Boizot A, Bartoloni L, Santoni F, Karłowicz D, McDonald M, Wu H, Hu Z, Chen G, Ou J, Brasch-Andersen C, Fagerberg CR, Dreyer I, Chun-Hui Tsai A, Slegesky V, McGee RB, Daniels B, Sellars EA, Carpenter LA, Schaefer B, Sacoto MJG, Begtrup A, Schnur RE, Punj S, Wentzensen IM, Rhodes L, Pan Q, Bernier RA, Chen C, Eichler EE, Xia K (2020) NCKAP1 Disruptive Variants Lead to a Neurodevelopmental Disorder with Core Features of Autism. *Am J Hum Genet* 107:963-976 doi:10.1016/j.ajhg.2020.10.002
78. Hagan N, Kane JL, Grover D, Woodworth L, Madore C, Saleh J, Sancho J, Liu J, Li Y, Proto J, Zelic M, Mahan A, Kothe M, Scholte AA, Fitzgerald M, Gisevius B, Haghighi A, Butovsky O, Ofengeim D (2020) CSF1R signaling is a regulator of pathogenesis in progressive MS. *Cell Death Dis* 11:904 doi:10.1038/s41419-020-03084-7
79. Hamann J, Aust G, Arac D, Engel FB, Formstone C, Fredriksson R, Hall RA, Harty BL, Kirchhoff C, Knapp B, Krishnan A, Liebscher I, Lin HH, Martinelli DC, Monk KR, Peeters MC, Piao X, Promel S, Schoneberg T, Schwartz TW, Singer K, Stacey M, Ushkaryov YA, Vallon M, Wolfrum U, Wright MW, Xu L, Langenhan T, Schioth HB (2015) International Union of Basic and Clinical Pharmacology. XCIV. Adhesion G protein-coupled receptors. *Pharmacol Rev* 67:338-367 doi:10.1124/pr.114.009647
80. Hansen M, Kuhlman ACB, Sahl RE, Kelly B, Morville T, Dohmann TL, Chrois KM, Larsen S, Helge JW, Dela F (2019) Inflammatory biomarkers in patients in Simvastatin treatment: No effect of co-enzyme Q10 supplementation. *Cytokine* 113:393-399 doi:10.1016/j.cyto.2018.10.011
81. Haralambieva IH, Zimmermann MT, Ovsyannikova IG, Grill DE, Oberg AL, Kennedy RB, Poland GA (2016) Whole Transcriptome Profiling Identifies CD93 and Other Plasma Cell Survival Factor Genes Associated with Measles-Specific Antibody Response after Vaccination. *PLoS One* 11:e0160970 doi:10.1371/journal.pone.0160970
82. Hartman MHT, Groot HE, Leach IM, Karper JC, van der Harst P (2018) Translational overview of cytokine inhibition in acute myocardial infarction and chronic heart failure. *Trends Cardiovasc Med* 28:369-379 doi:10.1016/j.tcm.2018.02.003
83. He S, Wang L, Miao L, Wang T, Du F, Zhao L, Wang X (2009) Receptor interacting protein kinase-3 determines cellular necrotic response to TNF- $\alpha$ . *Cell* 137:1100-1111 doi:10.1016/j.cell.2009.05.021
84. Helmke A, Nordlohne J, Balzer MS, Dong L, Rong S, Hiss M, Shushakova N, Haller H, von Vietinghoff S (2019) CX3CL1-CX3CR1 interaction mediates macrophage-mesothelial cross talk and promotes peritoneal fibrosis. *Kidney Int* 95:1405-1417 doi:10.1016/j.kint.2018.12.030
85. Henry RJ, Ritzel RM, Barrett JP, Doran SJ, Jiao Y, Leach JB, Szeto GL, Wu J, Stoica BA, Faden AI, Loane DJ (2020) Microglial Depletion with CSF1R Inhibitor During Chronic Phase of Experimental Traumatic Brain Injury Reduces Neurodegeneration and Neurological Deficits. *J Neurosci* 40:2960-2974 doi:10.1523/JNEUROSCI.2402-19.2020
86. Hille F, Charpentier E (2016) CRISPR-Cas: biology, mechanisms and relevance. *Philos Trans R Soc Lond B Biol Sci* 371 doi:10.1098/rstb.2015.0496
87. Hille F, Richter H, Wong SP, Bratovic M, Ressel S, Charpentier E (2018) The Biology of CRISPR-Cas: Backward and Forward. *Cell* 172:1239-1259 doi:10.1016/j.cell.2017.11.032
88. Hogg MC, Rayner M, Susdalezew S, Monsefi N, Crivello M, Woods I, Resler A, Blackburn L, Fabbriozzi P, Trolese MC, Nardo G, Bendotti C, van den Berg LH, van Es MA, Prehn JHM (2020) 5'ValCAC tRNA fragment generated as part of a protective angiogenic response provides prognostic value in amyotrophic lateral sclerosis. *Brain Commun* 2:fcaa138 doi:10.1093/braincomms/fcaa138
89. Hsieh WY, Zhou QD, York AG, Williams KJ, Scumpia PO, Kronenberger EB, Hoi XP, Su B, Chi X, Bui VL, Khialeeva E, Kaplan A, Son YM, Divakaruni AS, Sun J, Smale ST, Flavell RA, Bensinger SJ (2020) Toll-Like Receptors Induce Signal-Specific Reprogramming of the Macrophage Lipidome. *Cell Metab* 32:128-143 e125 doi:10.1016/j.cmet.2020.05.003
90. Huang-Fu N, Cheng JS, Wang Y, Li ZW, Wang SH (2018) Neat1 regulates oxidized low-density lipoprotein-induced inflammation and lipid uptake in macrophages via paraspeckle formation. *Mol Med Rep* 17:3092-3098 doi:10.3892/mmr.2017.8211

91. Huang S, Xu Y, Ge X, Xu B, Peng W, Jiang X, Shen L, Xia L (2019) Long noncoding RNA NEAT1 accelerates the proliferation and fibrosis in diabetic nephropathy through activating Akt/mTOR signaling pathway. *J Cell Physiol* 234:11200-11207 doi:10.1002/jcp.27770
92. Huangfu N, Xu Z, Zheng W, Wang Y, Cheng J, Chen X (2018) LncRNA MALAT1 regulates oxLDL-induced CD36 expression via activating beta-catenin. *Biochem Biophys Res Commun* 495:2111-2117 doi:10.1016/j.bbrc.2017.12.086
93. Hume DA, Caruso M, Ferrari-Cestari M, Summers KM, Pridans C, Irvine KM (2020) Phenotypic impacts of CSF1R deficiencies in humans and model organisms. *J Leukoc Biol* 107:205-219 doi:10.1002/JLB.MR0519-143R
94. Hunsucker SA, Spychala J, Mitchell BS (2001) Human cytosolic 5'-nucleotidase I: characterization and role in nucleoside analog resistance. *J Biol Chem* 276:10498-10504 doi:10.1074/jbc.M011218200
95. Husebye T, Eritsland J, Arnesen H, Bjornerheim R, Mangschau A, Seljelot I, Andersen GO (2014) Association of interleukin 8 and myocardial recovery in patients with ST-elevation myocardial infarction complicated by acute heart failure. *PLoS One* 9:e112359 doi:10.1371/journal.pone.0112359
96. Ignatova VV, Jansen P, Baltissen MP, Vermeulen M, Schneider R (2019) The interactome of a family of potential methyltransferases in HeLa cells. *Sci Rep* 9:6584 doi:10.1038/s41598-019-43010-2
97. Isobe M, Toya H, Mito M, Chiba T, Asahara H, Hirose T, Nakagawa S (2020) Forced isoform switching of Neat1\_1 to Neat1\_2 leads to the loss of Neat1\_1 and the hyperformation of paraspeckles but does not affect the development and growth of mice. *RNA* 26:251-264 doi:10.1261/rna.072587.119
98. Iyer DN, Faruq O, Zhang L, Rastgoo N, Liu A, Chang H (2021) Pathophysiological roles of myristoylated alanine-rich C-kinase substrate (MARCKS) in hematological malignancies. *Biomark Res* 9:34 doi:10.1186/s40364-021-00286-9
99. Janovitz T, Wong S, Young NS, Oliveira T, Falck-Pedersen E (2017) Parvovirus B19 integration into human CD36+ erythroid progenitor cells. *Virology* 511:40-48 doi:10.1016/j.virol.2017.08.011
100. Ji H, Ding Z, Hawke D, Xing D, Jiang BH, Mills GB, Lu Z (2012) AKT-dependent phosphorylation of Niban regulates nucleophosmin- and MDM2-mediated p53 stability and cell apoptosis. *EMBO Rep* 13:554-560 doi:10.1038/embor.2012.53
101. Jia Z, Zhang Y, Li Q, Ye Z, Liu Y, Fu C, Cang X, Wang M, Guan MX (2019) A coronary artery disease-associated tRNA<sup>Thr</sup> mutation altered mitochondrial function, apoptosis and angiogenesis. *Nucleic Acids Res* 47:2056-2074 doi:10.1093/nar/gky1241
102. Johansson ME, Zhang XY, Edfeldt K, Lundberg AM, Levin MC, Boren J, Li W, Yuan XM, Folkersen L, Eriksson P, Hedin U, Low H, Sviridov D, Rios FJ, Hansson GK, Yan ZQ (2014) Innate immune receptor NOD2 promotes vascular inflammation and formation of lipid-rich necrotic cores in hypercholesterolemic mice. *Eur J Immunol* 44:3081-3092 doi:10.1002/eji.201444755
103. Jones SA, Jenkins BJ (2018) Recent insights into targeting the IL-6 cytokine family in inflammatory diseases and cancer. *Nat Rev Immunol* 18:773-789 doi:10.1038/s41577-018-0066-7
104. Junttila IS (2018) Tuning the Cytokine Responses: An Update on Interleukin (IL)-4 and IL-13 Receptor Complexes. *Front Immunol* 9:888 doi:10.3389/fimmu.2018.00888
105. Kawabata K, Makino T, Makino K, Kajihara I, Fukushima S, Ihn H (2020) IL-16 expression is increased in the skin and sera of patients with systemic sclerosis. *Rheumatology (Oxford)* 59:519-523 doi:10.1093/rheumatology/kez318
106. Kawase T, Ichikawa H, Ohta T, Nozaki N, Tashiro F, Ohki R, Taya Y (2008) p53 target gene AEN is a nuclear exonuclease required for p53-dependent apoptosis. *Oncogene* 27:3797-3810 doi:10.1038/onc.2008.32
107. Kenneweg F, Bang C, Xiao K, Boulanger CM, Loyer X, Mazlan S, Schroen B, Hermans-Beijnsberger S, Foinquinos A, Hirt MN, Eschenhagen T, Funcke S, Stojanovic S, Genschel C, Schimmel K, Just A, Pfanne A, Scherf K, Dehmel S, Raemon-Buettner SM, Fiedler J, Thum T (2019) Long Noncoding RNA-Enriched Vesicles Secreted by Hypoxic Cardiomyocytes Drive Cardiac Fibrosis. *Mol Ther Nucleic Acids* 18:363-374 doi:10.1016/j.omtn.2019.09.003
108. Khan KA, Naylor AJ, Khan A, Noy PJ, Mambretti M, Lodhia P, Athwal J, Korzystka A, Buckley CD, Willcox BE, Mohammed F, Bicknell R (2017) Multimerin-2 is a ligand for group 14 family C-type lectins CLEC14A, CD93 and CD248 spanning the endothelial pericyte interface. *Oncogene* 36:6097-6108 doi:10.1038/onc.2017.214
109. Kielar M, Dumnicka P, Ignacak E, Bedkowska-Prokop A, Gala-Bladzinska A, Maziarz B, Ceranowicz P, Kusnierz-Cabala B (2021) Soluble Complement Component 1q Receptor 1 (sCD93) Is Associated with Graft Function in Kidney Transplant Recipients. *Biomolecules* 11 doi:10.3390/biom11111623
110. Kienhorst LB, van Lochem E, Kievit W, Dalbeth N, Merriman ME, Phipps-Green A, Loof A, van Heerde W, Vermeulen S, Stamp LK, van Koolwijk E, de Graaf J, Holzinger D, Roth J, Janssens HJ, Merriman TR, Broen JC, Janssen M, Radstake TR (2015) Gout Is a Chronic Inflammatory Disease in Which High Levels of Interleukin-8 (CXCL8), Myeloid-Related Protein 8/Myeloid-Related Protein 14 Complex, and an Altered Proteome Are Associated With Diabetes Mellitus and Cardiovascular Disease. *Arthritis Rheumatol* 67:3303-3313 doi:10.1002/art.39318

111. Kim ET, Dybas JM, Kulej K, Reyes ED, Price AM, Akhtar LN, Orr A, Garcia BA, Boutell C, Weitzman MD (2021) Comparative proteomics identifies Schlafen 5 (SLFN5) as a herpes simplex virus restriction factor that suppresses viral transcription. *Nat Microbiol* 6:234-245 doi:10.1038/s41564-020-00826-3
112. Kim H, Hwang JS, Lee B, Hong J, Lee S (2014) Newly Identified Cancer-Associated Role of Human Neuronal Growth Regulator 1 (NEGR1). *J Cancer* 5:598-608 doi:10.7150/jca.8052
113. Knutsen E, Lellahi SM, Aure MR, Nord S, Fismen S, Larsen KB, Gabriel MT, Hedberg A, Bjorklund SS, Oslo Breast Cancer Research C, Bofin AM, Maelandsmo GM, Sorlie T, Mortensen ES, Perander M (2020) The expression of the long NEAT1\_2 isoform is associated with human epidermal growth factor receptor 2-positive breast cancers. *Sci Rep* 10:1277 doi:10.1038/s41598-020-57759-4
114. Korbecki J, Siminska D, Kojder K, Grochans S, Gutowska I, Chlubek D, Baranowska-Bosiacka I (2020) Fractalkine/CX3CL1 in Neoplastic Processes. *Int J Mol Sci* 21 doi:10.3390/ijms21103723
115. Kotwica-Mojzycz K, Jodlowska-Jedrych B, Mojzycz M (2021) CD200:CD200R Interactions and Their Importance in Immunoregulation. *Int J Mol Sci* 22 doi:10.3390/ijms22041602
116. Kraler S, Wenzl FA, Georgiopoulos G, Obeid S, Liberale L, von Eckardstein A, Muller O, Mach F, Raber L, Losdat S, Schmiady MO, Stellos K, Stamatelopoulos K, Camici GG, Srdic A, Paneni F, Akhmedov A, Luscher TF (2022) Soluble lectin-like oxidized low-density lipoprotein receptor-1 predicts premature death in acute coronary syndromes. *Eur Heart J* doi:10.1093/eurheartj/ehac143
117. Kuhn CD, Wilusz JE, Zheng Y, Beal PA, Joshua-Tor L (2015) On-enzyme refolding permits small RNA and tRNA surveillance by the CCA-adding enzyme. *Cell* 160:644-658 doi:10.1016/j.cell.2015.01.005
118. Lancellotti P, Marechal P, Donis N, Oury C (2019) Inflammation, cardiovascular disease, and cancer: a common link with far-reaching implications. *Eur Heart J* 40:3910-3912 doi:10.1093/eurheartj/ehz645
119. Lewis Marffy AL, McCarthy AJ (2020) Leukocyte Immunoglobulin-Like Receptors (LILRs) on Human Neutrophils: Modulators of Infection and Immunity. *Front Immunol* 11:857 doi:10.3389/fimmu.2020.00857
120. Ley K, Pramod AB, Croft M, Ravichandran KS, Ting JP (2016) How Mouse Macrophages Sense What Is Going On. *Front Immunol* 7:204 doi:10.3389/fimmu.2016.00204
121. Li H, Kniep E, Emmendorffer A, Lohmann-Matthes ML (1991) Differentiation of macrophage precursors to cells with LAK activity under the influence of CSF-1 and high dose IL-2. *Scand J Immunol* 33:511-520 doi:10.1111/j.1365-3083.1991.tb02521.x
122. Li H, Pohler U, Strehlow I, Hertig S, Baccarini M, Emmendorffer A, Tschopp J, Lohmann-Matthes ML (1994) Macrophage precursor cells produce perforin and perform Yac-1 lytic activity in response to stimulation with interleukin-2. *J Leukoc Biol* 56:117-123 doi:10.1002/jlb.56.2.117
123. Li H, Schwitzer R, Baccarini M, Lohmann-Matthes ML (1989) Cooperative effects of colony-stimulating factor 1 and recombinant interleukin 2 on proliferation and induction of cytotoxicity of macrophage precursors generated from mouse bone marrow cell cultures. *J Exp Med* 169:973-986 doi:10.1084/jem.169.3.973
124. Li M, Kao E, Gao X, Sandig H, Limmer K, Pavon-Eternod M, Jones TE, Landry S, Pan T, Weitzman MD, David M (2012) Codon-usage-based inhibition of HIV protein synthesis by human schlafen 11. *Nature* 491:125-128 doi:10.1038/nature11433
125. Li X, Xiong X, Zhang M, Wang K, Chen Y, Zhou J, Mao Y, Lv J, Yi D, Chen XW, Wang C, Qian SB, Yi C (2017) Base-Resolution Mapping Reveals Distinct m(1)A Methylome in Nuclear- and Mitochondrial-Encoded Transcripts. *Mol Cell* 68:993-1005 e1009 doi:10.1016/j.molcel.2017.10.019
126. Li X, Ye S, Lu Y (2020) Long non-coding RNA NEAT1 overexpression associates with increased exacerbation risk, severity, and inflammation, as well as decreased lung function through the interaction with microRNA-124 in asthma. *J Clin Lab Anal* 34:e23023 doi:10.1002/jcla.23023
127. Liang Q, Su L, Zhang D, Jiao J (2020) CD93 negatively regulates astrogenesis in response to MMRN2 through the transcriptional repressor ZFP503 in the developing brain. *Proc Natl Acad Sci U S A* 117:9413-9422 doi:10.1073/pnas.1922713117
128. Libby P (2015) Fanning the flames: inflammation in cardiovascular diseases. *Cardiovasc Res* 107:307-309 doi:10.1093/cvr/cvv188
129. Lino Cardenas CL, Kessinger CW, Cheng Y, MacDonald C, MacGillivray T, Ghoshhajra B, Huleihel L, Nuri S, Yeri AS, Jaffer FA, Kaminski N, Ellinor P, Weintraub NL, Malhotra R, Isselbacher EM, Lindsay ME (2018) An HDAC9-MALAT1-BRG1 complex mediates smooth muscle dysfunction in thoracic aortic aneurysm. *Nat Commun* 9:1009 doi:10.1038/s41467-018-03394-7
130. Lino Cardenas CL, Kessinger CW, Chou EL, Ghoshhajra B, Yeri AS, Das S, Weintraub NL, Malhotra R, Jaffer FA, Lindsay ME (2019) HDAC9 complex inhibition improves smooth muscle-dependent stenotic vascular disease. *JCI Insight* 4 doi:10.1172/jci.insight.124706
131. Little FF, de Bie J, van Oosterhout A, Kornfeld H, Center DM, Cruikshank WW (2003) Immunomodulatory effect of interleukin-16 on allergic airway inflammation. *Chest* 123:431S-432S doi:10.1378/chest.123.3\_suppl.431s

132. Liu F, Zhou P, Wang Q, Zhang M, Li D (2018) The Schlafen family: complex roles in different cell types and virus replication. *Cell Biol Int* 42:2-8 doi:10.1002/cbin.10778
133. Liu HQ, Zhang XY, Edfeldt K, Nijhuis MO, Idborg H, Back M, Roy J, Hedin U, Jakobsson PJ, Laman JD, de Kleijn DP, Pasterkamp G, Hansson GK, Yan ZQ (2013) NOD2-mediated innate immune signaling regulates the eicosanoids in atherosclerosis. *Arterioscler Thromb Vasc Biol* 33:2193-2201 doi:10.1161/ATVBAHA.113.301715
134. Liu J, Chen SJ, Hsu SW, Zhang J, Li JM, Yang DC, Gu S, Pinkerton KE, Chen CH (2021) MARCKS cooperates with NKAP to activate NF- $\kappa$ B signaling in smoke-related lung cancer. *Theranostics* 11:4122-4136 doi:10.7150/thno.53558
135. Liu JQ, Hu A, Zhu J, Yu J, Talebian F, Bai XF (2020) CD200-CD200R Pathway in the Regulation of Tumor Immune Microenvironment and Immunotherapy. *Adv Exp Med Biol* 1223:155-165 doi:10.1007/978-3-030-35582-1\_8
136. Liu S, Lei Z, Li J, Wang L, Jia R, Liu Z, Jiang C, Gao Y, Liu M, Kuang L, Qian Z, Zhou D, Speck SH, Liang X (2020) Interleukin 16 contributes to gammaherpesvirus pathogenesis by inhibiting viral reactivation. *PLoS Pathog* 16:e1008701 doi:10.1371/journal.ppat.1008701
137. Liu X, Liu J, Zhao S, Zhang H, Cai W, Cai M, Ji X, Leak RK, Gao Y, Chen J, Hu X (2016) Interleukin-4 Is Essential for Microglia/Macrophage M2 Polarization and Long-Term Recovery After Cerebral Ischemia. *Stroke* 47:498-504 doi:10.1161/STROKEAHA.115.012079
138. Liu Y, Given KS, Dickson EL, Owens GP, Macklin WB, Bennett JL (2019) Concentration-dependent effects of CSF1R inhibitors on oligodendrocyte progenitor cells ex vivo and in vivo. *Exp Neurol* 318:32-41 doi:10.1016/j.expneurol.2019.04.011
139. Liu Y, Yang H, Liu LX, Yan W, Guo HJ, Li WJ, Tian C, Li HH, Wang HX (2016) NOD2 contributes to myocardial ischemia/reperfusion injury by regulating cardiomyocyte apoptosis and inflammation. *Life Sci* 149:10-17 doi:10.1016/j.lfs.2016.02.039
140. Lohmann-Matthes ML, Emmendoerffer A, Hao L (1991) Influence of interleukin-2 on the differentiation of macrophages. *Pathobiology* 59:117-121 doi:10.1159/000163627
141. Lu X, Huang J, Wu S, Zheng Q, Liu P, Feng H, Su X, Fu H, Xi Q, Wang G (2020) The tRNA-like small noncoding RNA mascRNA promotes global protein translation. *EMBO Rep* 21:e49684 doi:10.15252/embr.201949684
142. Luo Y, Duan H, Qian Y, Feng L, Wu Z, Wang F, Feng J, Yang D, Qin Z, Yan X (2017) Macrophagic CD146 promotes foam cell formation and retention during atherosclerosis. *Cell Res* 27:352-372 doi:10.1038/cr.2017.8
143. Lyons SM, Fay MM, Akiyama Y, Anderson PJ, Ivanov P (2017) RNA biology of angiogenin: Current state and perspectives. *RNA Biol* 14:171-178 doi:10.1080/15476286.2016.1272746
144. Lyu Q, Xu S, Lyu Y, Choi M, Christie CK, Slivano OJ, Rahman A, Jin ZG, Long X, Xu Y, Miano JM (2019) SENCER stabilizes vascular endothelial cell adherens junctions through interaction with CKAP4. *Proc Natl Acad Sci U S A* 116:546-555 doi:10.1073/pnas.1810729116
145. Ma M, Hui J, Zhang QY, Zhu Y, He Y, Liu XJ (2018) Long non-coding RNA nuclear-enriched abundant transcript 1 inhibition blunts myocardial ischemia reperfusion injury via autophagic flux arrest and apoptosis in streptozotocin-induced diabetic rats. *Atherosclerosis* 277:113-122 doi:10.1016/j.atherosclerosis.2018.08.031
146. Machyna M, Kiefer L, Simon MD (2020) Enhanced nucleotide chemistry and toehold nanotechnology reveals lncRNA spreading on chromatin. *Nat Struct Mol Biol* 27:297-304 doi:10.1038/s41594-020-0390-z
147. Malinauskas T, Peer TV, Bishop B, Mueller TD, Siebold C (2020) Repulsive guidance molecules lock growth differentiation factor 5 in an inhibitory complex. *Proc Natl Acad Sci U S A* 117:15620-15631 doi:10.1073/pnas.2000561117
148. Marino F, Tozzi M, Schembri L, Ferraro S, Tarallo A, Scanzano A, Legnaro M, Castelli P, Cosentino M (2015) Production of IL-8, VEGF and Elastase by Circulating and Intraplaque Neutrophils in Patients with Carotid Atherosclerosis. *PLoS One* 10:e0124565 doi:10.1371/journal.pone.0124565
149. Matsui K (1999) Role of interleukin-2 receptor expression on macrophages from Salmonella-infected mice. *FEMS Immunol Med Microbiol* 24:97-103 doi:10.1111/j.1574-695X.1999.tb01270.x
150. Matsumoto S, Yamamichi T, Shinzawa K, Kasahara Y, Nojima S, Kodama T, Obika S, Takehara T, Morii E, Okuyama H, Kikuchi A (2019) GREB1 induced by Wnt signaling promotes development of hepatoblastoma by suppressing TGF $\beta$  signaling. *Nat Commun* 10:3882 doi:10.1038/s41467-019-11533-x
151. Mavrommatis E, Fish EN, Platanias LC (2013) The schlafen family of proteins and their regulation by interferons. *J Interferon Cytokine Res* 33:206-210 doi:10.1089/jir.2012.0133
152. McCormack R, Podack ER (2015) Perforin-2/Mpeg1 and other pore-forming proteins throughout evolution. *J Leukoc Biol* 98:761-768 doi:10.1189/jlb.4MR1114-523RR
153. Mellett M (2020) Regulation and dysregulation of CARD14 signalling and its physiological consequences in inflammatory skin disease. *Cell Immunol* 354:104147 doi:10.1016/j.cellimm.2020.104147

154. Metzner FJ, Huber E, Hopfner KP, Lammens K (2022) Structural and biochemical characterization of human Schlafen 5. *Nucleic Acids Res* 50:1147-1161 doi:10.1093/nar/gkab1278
155. Mickeviciute GC, Valiuskyte M, Platten M, Wszolek ZK, Andersen O, Danylaite Karrenbauer V, Ineichen BV, Granberg T (2021) Neuroimaging phenotypes of CSF1R-related leukoencephalopathy: Systematic review, meta-analysis, and imaging recommendations. *J Intern Med* doi:10.1111/joim.13420
156. Mikulska M, Lanini S, Gudiol C, Drgona L, Ippolito G, Fernandez-Ruiz M, Salzberger B (2018) ESCMID Study Group for Infections in Compromised Hosts (ESGICH) Consensus Document on the safety of targeted and biological therapies: an infectious diseases perspective (Agents targeting lymphoid cells surface antigens [I]: CD19, CD20 and CD52). *Clin Microbiol Infect* 24 Suppl 2:S71-S82 doi:10.1016/j.cmi.2018.02.003
157. Modic M, Grosch M, Rot G, Schirge S, Lepko T, Yamazaki T, Lee FCY, Rusha E, Shaposhnikov D, Palo M, Merl-Pham J, Cacchiarelli D, Rogelj B, Hauck SM, von Mering C, Meissner A, Lickert H, Hirose T, Ule J, Drukker M (2019) Cross-Regulation between TDP-43 and Paraspeckles Promotes Pluripotency-Differentiation Transition. *Mol Cell* 74:951-965 e913 doi:10.1016/j.molcel.2019.03.041
158. Moreno Velasquez I, Gajulapuri A, Leander K, Berglund A, de Faire U, Gigante B (2019) Serum IL8 is not associated with cardiovascular events but with all-cause mortality. *BMC Cardiovasc Disord* 19:34 doi:10.1186/s12872-019-1014-6
159. Moss WN (2018) RNA2DMut: a web tool for the design and analysis of RNA structure mutations. *RNA* 24:273-286 doi:10.1261/rna.063933.117
160. Murugaiah V, Varghese PM, Beirag N, De Cordova S, Sim RB, Kishore U (2021) Complement Proteins as Soluble Pattern Recognition Receptors for Pathogenic Viruses. *Viruses* 13 doi:10.3390/v13050824
161. Musunuru K (2017) Genome Editing: The Recent History and Perspective in Cardiovascular Diseases. *J Am Coll Cardiol* 70:2808-2821 doi:10.1016/j.jacc.2017.10.002
162. Naganuma T, Nakagawa S, Tanigawa A, Sasaki YF, Goshima N, Hirose T (2012) Alternative 3'-end processing of long noncoding RNA initiates construction of nuclear paraspeckles. *EMBO J* 31:4020-4034 doi:10.1038/emboj.2012.251
163. Nakagawa S, Ip JY, Shioi G, Tripathi V, Zong X, Hirose T, Prasanth KV (2012) Malat1 is not an essential component of nuclear speckles in mice. *RNA* 18:1487-1499 doi:10.1261/rna.033217.112
164. Nakagawa S, Shimada M, Yanaka K, Mito M, Arai T, Takahashi E, Fujita Y, Fujimori T, Standaert L, Marine JC, Hirose T (2014) The lncRNA Neat1 is required for corpus luteum formation and the establishment of pregnancy in a subpopulation of mice. *Development* 141:4618-4627 doi:10.1242/dev.110544
165. Nakagawa S, Yamazaki T, Hirose T (2018) Molecular dissection of nuclear paraspeckles: towards understanding the emerging world of the RNP milieu. *Open Biol* 8 doi:10.1098/rsob.180150
166. Nativel B, Ramin-Mangata S, Mevizou R, Figueres A, Andries J, Iwema T, Ikewaki N, Gasque P, Viranaicken W (2019) CD93 is a cell surface lectin receptor involved in the control of the inflammatory response stimulated by exogenous DNA. *Immunology* 158:85-93 doi:10.1111/imm.13100
167. Negróni A, Pierdomenico M, Cucchiara S, Stronati L (2018) NOD2 and inflammation: current insights. *J Inflamm Res* 11:49-60 doi:10.2147/JIR.S137606
168. Nelson BJ, Danielpour D, Rossio JL, Turpin J, Nacy CA (1994) Interleukin-2 suppresses activated macrophage intracellular killing activity by inducing macrophages to secrete TGF-beta. *J Leukoc Biol* 55:81-90 doi:10.1002/jlb.55.1.81
169. Nimmerjahn F, Ravetch JV (2008) Fcgamma receptors as regulators of immune responses. *Nat Rev Immunol* 8:34-47 doi:10.1038/nri2206
170. Norsworthy PJ, Fossati-Jimack L, Cortes-Hernandez J, Taylor PR, Bygrave AE, Thompson RD, Nourshargh S, Walport MJ, Botto M (2004) Murine CD93 (C1qRp) contributes to the removal of apoptotic cells in vivo but is not required for C1q-mediated enhancement of phagocytosis. *J Immunol* 172:3406-3414 doi:10.4049/jimmunol.172.6.3406
171. Oosting M, Cheng SC, Bolscher JM, Vestering-Stenger R, Plantinga TS, Verschuere IC, Arts P, Garritsen A, van Eenennaam H, Sturm P, Kullberg BJ, Hoischen A, Adema GJ, van der Meer JW, Netea MG, Joosten LA (2014) Human TLR10 is an anti-inflammatory pattern-recognition receptor. *Proc Natl Acad Sci U S A* 111:E4478-4484 doi:10.1073/pnas.1410293111
172. Otsuka F, Zhao X, Trout HH, Qiao Y, Wasserman BA, Nakano M, Macphee CH, Brandt M, Krug-Gourley S, Guo L, Ladich ER, Cheng Q, Davis HR, Finn AV, Virmani R, Kolodgie FD (2017) Community-based statins and advanced carotid plaque: Role of CD163 positive macrophages in lipoprotein-associated phospholipase A2 activity in atherosclerotic plaque. *Atherosclerosis* 267:78-89 doi:10.1016/j.atherosclerosis.2017.10.014
173. Ozaki K, Leonard WJ (2002) Cytokine and cytokine receptor pleiotropy and redundancy. *J Biol Chem* 277:29355-29358 doi:10.1074/jbc.R200003200
174. Panigrahy D, Gartung A, Yang J, Yang H, Gilligan MM, Sulciner ML, Bhasin SS, Bielenberg DR, Chang J, Schmidt BA, Piwowarski J, Fishbein A, Soler-Ferran D, Sparks MA, Staffa SJ, Sukhatme V, Hammock BD, Kieran MW, Huang S, Bhasin M, Serhan CN,

- Sukhatme VP (2019) Preoperative stimulation of resolution and inflammation blockade eradicates micrometastases. *J Clin Invest* 129:2964-2979 doi:10.1172/JCI127282
175. Pascoal Ramos MI, Kesmir C, Stok JE, Geerdink R, Satravelas N, Westerlaken GHA, Meyaard L, van der Vlist M (2022) CD200R1L is a functional evolutionary conserved activating receptor in human neutrophils. *J Leukoc Biol* 111:367-377 doi:10.1002/JLB.2A0520-334R
  176. Pereira M, Ribeiro DR, Pinheiro MM, Ferreira M, Kellner S, Soares AR (2021) m(5)U54 tRNA Hypomodification by Lack of TRMT2A Drives the Generation of tRNA-Derived Small RNAs. *Int J Mol Sci* 22 doi:10.3390/ijms22062941
  177. Pickar-Oliver A, Gersbach CA (2019) The next generation of CRISPR-Cas technologies and applications. *Nat Rev Mol Cell Biol* 20:490-507 doi:10.1038/s41580-019-0131-5
  178. Poderoso T, De la Riva PM, Alvarez B, Dominguez J, Ezquerro A, Revilla C (2022) CD200R family receptors are expressed on porcine monocytes and modulate the production of IL-8 and TNF-alpha triggered by TLR4 or TLR7 in these cells. *Mol Immunol* 144:166-177 doi:10.1016/j.molimm.2022.02.019
  179. Poller W, Dimmeler S, Heymans S, Zeller T, Haas J, Karakas M, Leistner DM, Jakob P, Nakagawa S, Blankenberg S, Engelhardt S, Thum T, Weber C, Meder B, Hajjar R, Landmesser U (2018) Non-coding RNAs in cardiovascular diseases: diagnostic and therapeutic perspectives. *Eur Heart J* 39:2704-2716 doi:10.1093/eurheartj/ehx165
  180. Prabhudas M, Bowdish D, Drickamer K, Febbraio M, Herz J, Kobzik L, Krieger M, Loike J, Means TK, Moestrup SK, Post S, Sawamura T, Silverstein S, Wang XY, El Khoury J (2014) Standardizing scavenger receptor nomenclature. *J Immunol* 192:1997-2006 doi:10.4049/jimmunol.1490003
  181. Prehn JHM, Jirstrom E (2020) Angiogenin and tRNA fragments in Parkinson's disease and neurodegeneration. *Acta Pharmacol Sin* 41:442-446 doi:10.1038/s41401-020-0375-9
  182. Puck A, Aigner R, Modak M, Cejka P, Blaas D, Stockl J (2015) Expression and regulation of Schlafen (SLFN) family members in primary human monocytes, monocyte-derived dendritic cells and T cells. *Results Immunol* 5:23-32 doi:10.1016/j.rnim.2015.10.001
  183. Pyonteck SM, Akkari L, Schuhmacher AJ, Bowman RL, Sevenich L, Quail DF, Olson OC, Quick ML, Huse JT, Teijeiro V, Setty M, Leslie CS, Oei Y, Pedraza A, Zhang J, Brennan CW, Sutton JC, Holland EC, Daniel D, Joyce JA (2013) CSF-1R inhibition alters macrophage polarization and blocks glioma progression. *Nat Med* 19:1264-1272 doi:10.1038/nm.3337
  184. Quinodoz SA, Ollikainen N, Tabak B, Palla A, Schmidt JM, Detmar E, Lai MM, Shishkin AA, Bhat P, Takei Y, Trinh V, Aznauryan E, Russell P, Cheng C, Jovanovic M, Chow A, Cai L, McDonel P, Garber M, Guttman M (2018) Higher-Order Inter-chromosomal Hubs Shape 3D Genome Organization in the Nucleus. *Cell* 174:744-757 e724 doi:10.1016/j.cell.2018.05.024
  185. Raggi F, Pelassa S, Pierobon D, Penco F, Gattorno M, Novelli F, Eva A, Varesio L, Giovarelli M, Bosco MC (2017) Regulation of Human Macrophage M1-M2 Polarization Balance by Hypoxia and the Triggering Receptor Expressed on Myeloid Cells-1. *Front Immunol* 8:1097 doi:10.3389/fimmu.2017.01097
  186. Ramesh A, Kumar S, Nandi D, Kulkarni A (2019) CSF1R- and SHP2-Inhibitor-Loaded Nanoparticles Enhance Cytotoxic Activity and Phagocytosis in Tumor-Associated Macrophages. *Adv Mater* 31:e1904364 doi:10.1002/adma.201904364
  187. Rashad S, Niizuma K, Tominaga T (2020) tRNA cleavage: a new insight. *Neural Regen Res* 15:47-52 doi:10.4103/1673-5374.264447
  188. Remmerie A, Scott CL (2018) Macrophages and lipid metabolism. *Cell Immunol* 330:27-42 doi:10.1016/j.cellimm.2018.01.020
  189. Roberts O, Paraoan L (2020) PERP-ing into diverse mechanisms of cancer pathogenesis: Regulation and role of the p53/p63 effector PERP. *Biochim Biophys Acta Rev Cancer* 1874:188393 doi:10.1016/j.bbcan.2020.188393
  190. Rojo R, Raper A, Ozdemir DD, Lefevre L, Grabert K, Wollscheid-Lengeling E, Bradford B, Caruso M, Gazova I, Sanchez A, Lisowski ZM, Alves J, Molina-Gonzalez I, Davtyan H, Lodge RJ, Glover JD, Wallace R, Munro DAD, David E, Amit I, Miron VE, Priller J, Jenkins SJ, Hardingham GE, Blurton-Jones M, Mabbott NA, Summers KM, Hohenstein P, Hume DA, Pridans C (2019) Deletion of a Csf1r enhancer selectively impacts CSF1R expression and development of tissue macrophage populations. *Nat Commun* 10:3215 doi:10.1038/s41467-019-11053-8
  191. Ruan Z, Wang S, Yu W, Deng F (2019) LncRNA NEAT1 aggravates diabetic myocardial ischemia-reperfusion injury through regulating PINK1 by targeting miR-27b. *Int J Cardiol* 286:136 doi:10.1016/j.ijcard.2019.03.046
  192. Sadik A, Somarribas Patterson LF, Ozturk S, Mohapatra SR, Panitz V, Secker PF, Pfander P, Loth S, Salem H, Prentzell MT, Berdel B, Iskar M, Faessler E, Reuter F, Kirst I, Kalter V, Foerster KI, Jager E, Guevara CR, Sobeh M, Hielscher T, Poschet G, Reinhardt A, Hassel JC, Zapatka M, Hahn U, von Deimling A, Hopf C, Schlichting R, Escher BI, Burhenne J, Haefeli WE, Ishaque N, Bohme A, Schauble S, Thedieck K, Trump S, Seiffert M, Opitz CA (2020) IL4I1 Is a Metabolic Immune Checkpoint that Activates the AHR and Promotes Tumor Progression. *Cell* 182:1252-1270 e1234 doi:10.1016/j.cell.2020.07.038
  193. Sarangdhar MA, Allam R (2021) Angiogenin (ANG)-Ribonuclease Inhibitor (RNH1) System in Protein Synthesis and Disease. *Int J Mol Sci* 22 doi:10.3390/ijms22031287

194. Scheibenbogen C, Keilholz U, Richter M, Andreesen R, Hunstein W (1992) The interleukin-2 receptor in human monocytes and macrophages: regulation of expression and release of the alpha and beta chains (p55 and p75). *Res Immunol* 143:33-37 doi:10.1016/0923-2494(92)80077-x
195. Schmall A, Al-Tamari HM, Herold S, Kampschulte M, Weigert A, Wietelmann A, Vipotnik N, Grimminger F, Seeger W, Pullamsetti SS, Savai R (2015) Macrophage and cancer cell cross-talk via CCR2 and CX3CR1 is a fundamental mechanism driving lung cancer. *Am J Respir Crit Care Med* 191:437-447 doi:10.1164/rccm.201406-1137OC
196. Schnappauf O, Chae JJ, Kastner DL, Aksentijevich I (2019) The Pyrin Inflammasome in Health and Disease. *Front Immunol* 10:1745 doi:10.3389/fimmu.2019.01745
197. Schulman IG (2017) Liver X receptors link lipid metabolism and inflammation. *FEBS Lett* 591:2978-2991 doi:10.1002/1873-3468.12702
198. Schwarz DA, Katayama CD, Hedrick SM (1998) Schlafen, a new family of growth regulatory genes that affect thymocyte development. *Immunity* 9:657-668 doi:10.1016/s1074-7613(00)80663-9
199. Seizer P, Schiemann S, Merz T, Daub K, Bigalke B, Stellos K, Muller I, Stockle C, Muller K, Gawaz M, May AE (2010) CD36 and macrophage scavenger receptor a modulate foam cell formation via inhibition of lipid-laden platelet phagocytosis. *Semin Thromb Hemost* 36:157-162 doi:10.1055/s-0030-1251499
200. Sheng J, Xu Z (2016) Three decades of research on angiogenin: a review and perspective. *Acta Biochim Biophys Sin (Shanghai)* 48:399-410 doi:10.1093/abbs/gmv131
201. Shiga T, Nozaki Y, Tomita D, Kishimoto K, Hirooka Y, Kinoshita K, Funauchi M, Matsumura I (2021) Usefulness of Interleukin-18 as a Diagnostic Biomarker to Differentiate Adult-Onset Still's Disease With/Without Macrophage Activation Syndrome From Other Secondary Hemophagocytic Lymphohistiocytosis in Adults. *Front Immunol* 12:750114 doi:10.3389/fimmu.2021.750114
202. Shin SP, Goh AR, Ju JM, Kang HG, Kim SJ, Kim JK, Park EJ, Bae YS, Choi K, Jung YS, Lee SJ (2021) Local adenoviral delivery of soluble CD200R-Ig enhances antitumor immunity by inhibiting CD200-beta-catenin-driven M2 macrophage. *Mol Ther Oncolytics* 23:138-150 doi:10.1016/j.omto.2021.09.001
203. Shingai Y, Yokota T, Okuzaki D, Sudo T, Ishibashi T, Doi Y, Ueda T, Ozawa T, Nakai R, Tanimura A, Ichii M, Shibayama H, Kanakura Y, Hosen N (2021) Autonomous TGFbeta signaling induces phenotypic variation in human acute myeloid leukemia. *Stem Cells* 39:723-736 doi:10.1002/stem.3348
204. Simchovitz A, Hanan M, Niederhoffer N, Madrer N, Yayon N, Bennett ER, Greenberg DS, Kadener S, Soreq H (2019) NEAT1 is overexpressed in Parkinson's disease substantia nigra and confers drug-inducible neuroprotection from oxidative stress. *FASEB J* 33:11223-11234 doi:10.1096/fj.201900830R
205. Singh K, Loreth D, Pottker B, Hefti K, Innos J, Schwald K, Hengstler H, Menzel L, Sommer CJ, Radyushkin K, Kretz O, Philips MA, Haas CA, Frauenknecht K, Lillevali K, Heimrich B, Vasar E, Schafer MKE (2018) Neuronal Growth and Behavioral Alterations in Mice Deficient for the Psychiatric Disease-Associated Negr1 Gene. *Front Mol Neurosci* 11:30 doi:10.3389/fnmol.2018.00030
206. Sjaarda J, Gerstein H, Chong M, Yusuf S, Meyre D, Anand SS, Hess S, Pare G (2018) Blood CSF1 and CXCL12 as Causal Mediators of Coronary Artery Disease. *J Am Coll Cardiol* 72:300-310 doi:10.1016/j.jacc.2018.04.067
207. Smith KP, Hall LL, Lawrence JB (2020) Nuclear hubs built on RNAs and clustered organization of the genome. *Curr Opin Cell Biol* 64:67-76 doi:10.1016/j.ceb.2020.02.015
208. Sohn WJ, Kim D, Lee KW, Kim MS, Kwon S, Lee Y, Kim DS, Kwon HJ (2007) Novel transcriptional regulation of the schlafen-2 gene in macrophages in response to TLR-triggered stimulation. *Mol Immunol* 44:3273-3282 doi:10.1016/j.molimm.2007.03.001
209. Stefanovic L, Stefanovic B (2012) Role of cytokine receptor-like factor 1 in hepatic stellate cells and fibrosis. *World J Hepatol* 4:356-364 doi:10.4254/wjh.v4.i12.356
210. Su Y, Yamazaki S, Morisue R, Suzuki J, Yoshikawa T, Nakatsura T, Tsuboi M, Ochiai A, Ishii G (2021) Tumor-Infiltrating T Cells Concurrently Overexpress CD200R with Immune Checkpoints PD-1, CTLA-4, and TIM-3 in Non-Small-Cell Lung Cancer. *Pathobiology* 88:218-227 doi:10.1159/000511557
211. Sun GD, Kobayashi T, Abe M, Tada N, Adachi H, Shiota A, Totsuka Y, Hino O (2007) The endoplasmic reticulum stress-inducible protein Niban regulates eIF2alpha and S6K1/4E-BP1 phosphorylation. *Biochem Biophys Res Commun* 360:181-187 doi:10.1016/j.bbrc.2007.06.021
212. Sun H, He X, Tao X, Hou T, Chen M, He M, Liao H (2020) The CD200/CD200R signaling pathway contributes to spontaneous functional recovery by enhancing synaptic plasticity after stroke. *J Neuroinflammation* 17:171 doi:10.1186/s12974-020-01845-x
213. Sun R, Hedl M, Abraham C (2019) Twist1 and Twist2 Induce Human Macrophage Memory upon Chronic Innate Receptor Treatment by HDAC-Mediated Deacetylation of Cytokine Promoters. *J Immunol* 202:3297-3308 doi:10.4049/jimmunol.1800757
214. Sun Y, Chen W, Torphy RJ, Yao S, Zhu G, Lin R, Lugano R, Miller EN, Fujiwara Y, Bian L, Zheng L, Anand S, Gao F, Zhang W, Ferrara SE, Goodspeed AE, Dimberg A, Wang XJ, Edil BH, Barnett CC, Schulick RD, Chen L, Zhu Y (2021) Blockade of the CD93 pathway

normalizes tumor vasculature to facilitate drug delivery and immunotherapy. *Sci Transl Med* 13 doi:10.1126/scitranslmed.abc8922

215. Sundaram B, Kanneganti TD (2021) Advances in Understanding Activation and Function of the NLR4 Inflammasome. *Int J Mol Sci* 22 doi:10.3390/ijms22031048
216. Suzuki T, Yashiro Y, Kikuchi I, Ishigami Y, Saito H, Matsuzawa I, Okada S, Mito M, Iwasaki S, Ma D, Zhao X, Asano K, Lin H, Kirino Y, Sakaguchi Y, Suzuki T (2020) Complete chemical structures of human mitochondrial tRNAs. *Nat Commun* 11:4269 doi:10.1038/s41467-020-18068-6
217. Suzuki Y, Shirai M, Asada K, Yasui H, Karayama M, Hozumi H, Furuhashi K, Enomoto N, Fujisawa T, Nakamura Y, Inui N, Shirai T, Hayakawa H, Suda T (2018) Macrophage mannose receptor, CD206, predict prognosis in patients with pulmonary tuberculosis. *Sci Rep* 8:13129 doi:10.1038/s41598-018-31565-5
218. Swaminathan K, Campbell A, Papalazarou V, Jaber-Hijazi F, Nixon C, McGhee E, Strathdee D, Sansom OJ, Machesky LM (2021) The RAC1 Target NCKAP1 Plays a Crucial Role in the Progression of Braf;Pten-Driven Melanoma in Mice. *J Invest Dermatol* 141:628-637 e615 doi:10.1016/j.jid.2020.06.029
219. Swanson KV, Deng M, Ting JP (2019) The NLRP3 inflammasome: molecular activation and regulation to therapeutics. *Nat Rev Immunol* 19:477-489 doi:10.1038/s41577-019-0165-0
220. Szomjak E, Der H, Kerekes G, Veres K, Csiba L, Toth J, Peter M, Soltesz P, Szodoray P (2010) Immunological parameters, including CXCL8 (IL-8) characterize cerebro- and cardiovascular events in patients with peripheral artery diseases. *Scand J Immunol* 71:283-291 doi:10.1111/j.1365-3083.2010.02368.x
221. Takai T, Ono M, Hikida M, Ohmori H, Ravetch JV (1996) Augmented humoral and anaphylactic responses in Fc gamma RII-deficient mice. *Nature* 379:346-349 doi:10.1038/379346a0
222. Takenaka M, Yabuta A, Takahashi Y, Takakura Y (2021) Interleukin-4-carrying small extracellular vesicles with a high potential as anti-inflammatory therapeutics based on modulation of macrophage function. *Biomaterials* 278:121160 doi:10.1016/j.biomaterials.2021.121160
223. Teng Y, Qin H, Bahassan A, Bendzun NG, Kennedy EJ, Cowell JK (2016) The WASF3-NCKAP1-CYFIP1 Complex Is Essential for Breast Cancer Metastasis. *Cancer Res* 76:5133-5142 doi:10.1158/0008-5472.CAN-16-0562
224. Thornton S, Tan R, Sproles A, Do T, Schick J, Grom AA, DeLay M, Schuler GS (2019) A Multiparameter Flow Cytometry Analysis Panel to Assess CD163 mRNA and Protein in Monocyte and Macrophage Populations in Hyperinflammatory Diseases. *J Immunol* 202:1635-1643 doi:10.4049/jimmunol.1800765
225. Tosi GM, Caldi E, Parolini B, Toti P, Neri G, Nardi F, Traversi C, Cevenini G, Marigliani D, Nuti E, Bacci T, Galvagni F, Orlandini M (2017) CD93 as a Potential Target in Neovascular Age-Related Macular Degeneration. *J Cell Physiol* 232:1767-1773 doi:10.1002/jcp.25689
226. Tremblay M, Sanchez-Ferras O, Bouchard M (2018) GATA transcription factors in development and disease. *Development* 145 doi:10.1242/dev.164384
227. Trindade BC, Chen GY (2020) NOD1 and NOD2 in inflammatory and infectious diseases. *Immunol Rev* 297:139-161 doi:10.1111/imr.12902
228. Ushach I, Zlotnik A (2016) Biological role of granulocyte macrophage colony-stimulating factor (GM-CSF) and macrophage colony-stimulating factor (M-CSF) on cells of the myeloid lineage. *J Leukoc Biol* 100:481-489 doi:10.1189/jlb.3RU0316-144R
229. Van't Klooster CC, Ridker PM, Hjortnaes J, van der Graaf Y, Asselbergs FW, Westerink J, Aerts J, Visseren FLJ (2019) The relation between systemic inflammation and incident cancer in patients with stable cardiovascular disease: a cohort study. *Eur Heart J* 40:3901-3909 doi:10.1093/eurheartj/ehz587
230. Van Haute L, Lee SY, McCann BJ, Powell CA, Bansal D, Vasiliauskaite L, Garone C, Shin S, Kim JS, Frye M, Gleeson JG, Miska EA, Rhee HW, Minczuk M (2019) NSUN2 introduces 5-methylcytosines in mammalian mitochondrial tRNAs. *Nucleic Acids Res* 47:8720-8733 doi:10.1093/nar/gkz559
231. Velasquez IM, Frumento P, Johansson K, Berglund A, de Faire U, Leander K, Gigante B (2014) Association of interleukin 8 with myocardial infarction: results from the Stockholm Heart Epidemiology Program. *Int J Cardiol* 172:173-178 doi:10.1016/j.ijcard.2013.12.170
232. Vitale J, Terren I, Orrantia A, Bilbao A, Gamboa PM, Borrego F, Zenarruzabeitia O (2020) The Expression and Function of CD300 Molecules in the Main Players of Allergic Responses: Mast Cells, Basophils and Eosinophils. *Int J Mol Sci* 21 doi:10.3390/ijms21093173
233. Vitale J, Terren I, Orrantia A, Zenarruzabeitia O, Borrego F (2019) CD300 receptor family in viral infections. *Eur J Immunol* 49:364-374 doi:10.1002/eji.201847951
234. Vogel A, Brunner JS, Hajto A, Sharif O, Schabbauer G (2022) Lipid scavenging macrophages and inflammation. *Biochim Biophys Acta Mol Cell Biol Lipids* 1867:159066 doi:10.1016/j.bbalip.2021.159066



235. Wang J, Li Y (2019) CD36 tango in cancer: signaling pathways and functions. *Theranostics* 9:4893-4908 doi:10.7150/thno.36037
236. Wang L, Liu Y, Yan S, Du T, Fu X, Gong X, Zhou X, Zhang T, Wang X (2020) Disease Progression-Dependent Expression of CD200R1 and CX3CR1 in Mouse Models of Parkinson's Disease. *Aging Dis* 11:254-268 doi:10.14336/AD.2019.0615
237. Wang Y, Hu SB, Wang MR, Yao RW, Wu D, Yang L, Chen LL (2018) Genome-wide screening of NEAT1 regulators reveals cross-regulation between paraspeckles and mitochondria. *Nat Cell Biol* 20:1145-1158 doi:10.1038/s41556-018-0204-2
238. Wang Z, Xu Q, Zhang N, Du X, Xu G, Yan X (2020) CD146, from a melanoma cell adhesion molecule to a signaling receptor. *Signal Transduct Target Ther* 5:148 doi:10.1038/s41392-020-00259-8
239. Wellner K, Czech A, Ignatova Z, Betat H, Morl M (2018) Examining tRNA 3'-ends in Escherichia coli: teamwork between CCA-adding enzyme, RNase T, and RNase R. *RNA* 24:361-370 doi:10.1261/rna.064436.117
240. West JA, Mito M, Kurosaka S, Takumi T, Tanegashima C, Chujo T, Yanaka K, Kingston RE, Hirose T, Bond C, Fox A, Nakagawa S (2016) Structural, super-resolution microscopy analysis of paraspeckle nuclear body organization. *J Cell Biol* 214:817-830 doi:10.1083/jcb.201601071
241. Wilusz JE (2015) Controlling translation via modulation of tRNA levels. *Wiley Interdiscip Rev RNA* 6:453-470 doi:10.1002/wrna.1287
242. Wilusz JE, Freier SM, Spector DL (2008) 3' end processing of a long nuclear-retained noncoding RNA yields a tRNA-like cytoplasmic RNA. *Cell* 135:919-932 doi:10.1016/j.cell.2008.10.012
243. Wilusz JE, Whipple JM, Phizicky EM, Sharp PA (2011) tRNAs marked with CCACCA are targeted for degradation. *Science* 334:817-821 doi:10.1126/science.1213671
244. Wu HJ, Tang GM, Shao PY, Zou HX, Shen WF, Huang MD, Pan HH, Zhai CL, Qian G (2019) Long non-coding RNA NEAT1 modulates hypoxia/reoxygenation-induced cardiomyocyte injury via targeting microRNA-520a. *Exp Ther Med* 18:2199-2206 doi:10.3892/etm.2019.7788
245. Xie SJ, Diao LT, Cai N, Zhang LT, Xiang S, Jia CC, Qiu DB, Liu C, Sun YJ, Lei H, Hou YR, Tao S, Hu YX, Xiao ZD, Zhang Q (2021) lncRNA and its parent lncRNA MALAT1 promote proliferation and metastasis of hepatocellular carcinoma cells by activating ERK/MAPK signaling pathway. *Cell Death Discov* 7:110 doi:10.1038/s41420-021-00497-x
246. Xiong Y, He L, Shay C, Lang L, Loveless J, Yu J, Chemmalakuzhy R, Jiang H, Liu M, Teng Y (2019) Nck-associated protein 1 associates with HSP90 to drive metastasis in human non-small-cell lung cancer. *J Exp Clin Cancer Res* 38:122 doi:10.1186/s13046-019-1124-0
247. Xu Y, Cao Z, Ding Y, Li Z, Xiang X, Lai R, Sheng Z, Liu Y, Cai W, Hu R, Wang H, Xie Q (2019) Long Non-coding RNA NEAT1 Alleviates Acute-on-Chronic Liver Failure Through Blocking TRAF6 Mediated Inflammatory Response. *Front Physiol* 10:1503 doi:10.3389/fphys.2019.01503
248. Xun Q, Wang Z, Hu X, Ding K, Lu X (2020) Small-Molecule CSF1R Inhibitors as Anticancer Agents. *Curr Med Chem* 27:3944-3966 doi:10.2174/1573394715666190618121649
249. Yamazaki T, Fujikawa C, Kubota A, Takahashi A, Hirose T (2018) CRISPRa-mediated NEAT1 lncRNA upregulation induces formation of intact paraspeckles. *Biochem Biophys Res Commun* 504:218-224 doi:10.1016/j.bbrc.2018.08.158
250. Yamazaki T, Souquere S, Chujo T, Kobelke S, Chong YS, Fox AH, Bond CS, Nakagawa S, Pierron G, Hirose T (2018) Functional Domains of NEAT1 Architectural lncRNA Induce Paraspeckle Assembly through Phase Separation. *Mol Cell* 70:1038-1053 e1037 doi:10.1016/j.molcel.2018.05.019
251. Yao Y, Xu XH, Jin L (2019) Macrophage Polarization in Physiological and Pathological Pregnancy. *Front Immunol* 10:792 doi:10.3389/fimmu.2019.00792
252. Yin S, Lu K, Tan T, Tang J, Wei J, Liu X, Hu X, Wan H, Huang W, Fan Y, Xie D, Yu Y (2020) Transcriptomic and open chromatin atlas of high-resolution anatomical regions in the rhesus macaque brain. *Nat Commun* 11:474 doi:10.1038/s41467-020-14368-z
253. Yoon T, Pyo JY, Ahn SS, Song JJ, Park YB, Lee SW (2020) Serum interleukin-16 significantly correlates with the Vasculitis Damage Index in antineutrophil cytoplasmic antibody-associated vasculitis. *Arthritis Res Ther* 22:73 doi:10.1186/s13075-020-02172-5
254. Youn JC, Yu HT, Jeon JW, Lee HS, Jang Y, Park YW, Park YB, Shin EC, Ha JW (2014) Soluble CD93 levels in patients with acute myocardial infarction and its implication on clinical outcome. *PLoS One* 9:e96538 doi:10.1371/journal.pone.0096538
255. Yu B, Wang S (2018) Angio-LncRs: lncRNAs that regulate angiogenesis and vascular disease. *Theranostics* 8:3654-3675 doi:10.7150/thno.26024
256. Yu Y, Wang Z, Zheng Q, Li J (2021) GREB1L overexpression correlates with prognosis and immune cell infiltration in lung adenocarcinoma. *Sci Rep* 11:13281 doi:10.1038/s41598-021-92695-x
257. Yuan H, Zelkha S, Burkatovskaya M, Gupte R, Leeman SE, Amar S (2013) Pivotal role of NOD2 in inflammatory processes affecting atherosclerosis and periodontal bone loss. *Proc Natl Acad Sci U S A* 110:E5059-5068 doi:10.1073/pnas.1320862110

258. Yuasa T, Kubo S, Yoshino T, Ujike A, Matsumura K, Ono M, Ravetch JV, Takai T (1999) Deletion of fcγ receptor IIB renders H-2(b) mice susceptible to collagen-induced arthritis. *J Exp Med* 189:187-194 doi:10.1084/jem.189.1.187
259. Yue T, Zhan X, Zhang D, Jain R, Wang KW, Choi JH, Misawa T, Su L, Quan J, Hildebrand S, Xu D, Li X, Turer E, Sun L, Moresco EMY, Beutler B (2021) SLFN2 protection of tRNAs from stress-induced cleavage is essential for T cell-mediated immunity. *Science* 372 doi:10.1126/science.aba4220
260. Yue Y, Huang W, Liang J, Guo J, Ji J, Yao Y, Zheng M, Cai Z, Lu L, Wang J (2015) IL4I1 Is a Novel Regulator of M2 Macrophage Polarization That Can Inhibit T Cell Activation via L-Tryptophan and Arginine Depletion and IL-10 Production. *PLoS One* 10:e0142979 doi:10.1371/journal.pone.0142979
261. Zani IA, Stephen SL, Mughal NA, Russell D, Homer-Vanniasinkam S, Wheatcroft SB, Ponnambalam S (2015) Scavenger receptor structure and function in health and disease. *Cells* 4:178-201 doi:10.3390/cells4020178
262. Zhang B, Li B, Sun C, Tu T, Xiao Y, Liu Q (2021) Identification of key gene modules and pathways of human platelet transcriptome in acute myocardial infarction patients through co-expression network. *Am J Transl Res* 13:3890-3905
263. Zhang B, Mao YS, Diermeier SD, Novikova IV, Nawrocki EP, Jones TA, Lazar Z, Tung CS, Luo W, Eddy SR, Sanbonmatsu KY, Spector DL (2017) Identification and Characterization of a Class of MALAT1-like Genomic Loci. *Cell Rep* 19:1723-1738 doi:10.1016/j.celrep.2017.05.006
264. Zhang DW, Shao J, Lin J, Zhang N, Lu BJ, Lin SC, Dong MQ, Han J (2009) RIP3, an energy metabolism regulator that switches TNF-induced cell death from apoptosis to necrosis. *Science* 325:332-336 doi:10.1126/science.1172308
265. Zhang M, Zheng Y, Sun Y, Li S, Chen L, Jin X, Hou X, Liu X, Chen Q, Li J, Liu M, Zheng X, Zhang Y, Wu J, Yu B (2019) Knockdown of NEAT1 induces tolerogenic phenotype in dendritic cells by inhibiting activation of NLRP3 inflammasome. *Theranostics* 9:3425-3442 doi:10.7150/thno.33178
266. Zhang P, Cao L, Zhou R, Yang X, Wu M (2019) The lncRNA Neat1 promotes activation of inflammasomes in macrophages. *Nat Commun* 10:1495 doi:10.1038/s41467-019-09482-6
267. Zhang Q, Chao TC, Patil VS, Qin Y, Tiwari SK, Chiou J, Dobin A, Tsai CM, Li Z, Dang J, Gupta S, Urdahl K, Nizet V, Gingeras TR, Gaulton KJ, Rana TM (2019) The long noncoding RNA ROCK1 regulates inflammatory gene expression. *EMBO J* 38 doi:10.15252/embj.2018100041
268. Zhang Q, Lian Z, Zhang W, Cui Y, Wang W, Wu J, Chen Z, Wang W (2019) Association between interleukin-8 gene -251 A/T polymorphism and the risk of coronary artery disease: A meta-analysis. *Medicine (Baltimore)* 98:e17866 doi:10.1097/MD.00000000000017866
269. Zhang X, Cui J, Qian H, Wang B, Yan F, Zhao Z (2020) CD200R Is Involved in the Anti-inflammatory Effect of Dexmedetomidine in Lipopolysaccharide-Stimulated Microglia. *Inflammation* 43:1707-1715 doi:10.1007/s10753-020-01244-7
270. Zhao G, Zhang H, Zhu S, Wang S, Zhu K, Zhao Y, Xu L, Zhang P, Xie J, Sun A, Zou Y, Ge J (2021) Interleukin-18 accelerates cardiac inflammation and dysfunction during ischemia/reperfusion injury by transcriptional activation of CXCL16. *Cell Signal* 87:110141 doi:10.1016/j.cellsig.2021.110141
271. Zhao Y, Su H, Shen X, Du J, Zhang X, Zhao Y (2017) The immunological function of CD52 and its targeting in organ transplantation. *Inflamm Res* 66:571-578 doi:10.1007/s00011-017-1032-8
272. Zheng D, Liwinski T, Elinav E (2020) Inflammasome activation and regulation: toward a better understanding of complex mechanisms. *Cell Discov* 6:36 doi:10.1038/s41421-020-0167-x
273. Zhou ZW, Zheng LJ, Ren X, Li AP, Zhou WS (2019) LncRNA NEAT1 facilitates survival and angiogenesis in oxygen-glucose deprivation (OGD)-induced brain microvascular endothelial cells (BMECs) via targeting miR-377 and upregulating SIRT1, VEGFA, and BCL-XL. *Brain Res* 1707:90-98 doi:10.1016/j.brainres.2018.10.031
274. Zong T, Yang Y, Zhao H, Li L, Liu M, Fu X, Tang G, Zhou H, Aung LHH, Li P, Wang J, Wang Z, Yu T (2021) tsRNAs: Novel small molecules from cell function and regulatory mechanism to therapeutic targets. *Cell Prolif* 54:e12977 doi:10.1111/cpr.12977
275. Zong X, Nakagawa S, Freier SM, Fei J, Ha T, Prasanth SG, Prasanth KV (2016) Natural antisense RNA promotes 3' end processing and maturation of MALAT1 lncRNA. *Nucleic Acids Res* 44:2898-2908 doi:10.1093/nar/gkw047
